# Supplementary material for: Total synthesis of the natural (−)-205B alkaloid and its activity toward α7 nAChRs
Source: Royal Society of Chemistry journal article supplement (doi:10.1039/d2ob01723g), 2022-12-20

# Total Synthesis of Natural (-)-205B Alkaloid and its Activity Toward $\alpha 7$ -nAChR

*Sara Mazeh,<sup>[a]</sup> Maria-Dolores Garcia-Fernandez,<sup>[b]</sup> Barbara Pelletier,<sup>[b]</sup> Christophe  
Moreau<sup>[b]</sup> and Philippe Delair\*<sup>[a]</sup>*

<sup>a</sup>Département de Pharmacochimie Moléculaire, Univ. Grenoble Alpes, ICMG FR-2607,  
CNRS, UMR-5063, F-38041, Grenoble, France

<sup>b</sup>Univ. Grenoble Alpes, CNRS, CEA, IBS, F-38000 Grenoble

## Electronic Supplementary Information

### Table of Contents

|                                                                                                                                        |           |
|----------------------------------------------------------------------------------------------------------------------------------------|-----------|
| General details                                                                                                                        | page S-2  |
| Experimental procedures and spectroscopic data                                                                                         | page S-3  |
| Summary of previously published synthesis of alkaloid 205B                                                                             | page S-14 |
| Comparison Tables of NMR Data of <b>1</b>                                                                                              | page S-17 |
| NMR spectra for compounds <b>1</b> , <b>7a</b> , <b>7b</b> , <b>7c</b> , <b>8a</b> , <b>8b</b> , <b>9 – 14</b> , <b>17</b> , <b>S1</b> | page S-19 |

## General details

All reactions were carried out under argon, unless otherwise stated. THF and Et<sub>2</sub>O were distilled from Na-benzophenone, CH<sub>2</sub>Cl<sub>2</sub> and iPr<sub>2</sub>NH from CaH<sub>2</sub>, and DMF from CaSO<sub>4</sub>. All other commercial materials were used as received without purification. NMR spectra were recorded on a Bruker Avance 400, or Bruker Avance III 500 spectrometer and the coupling constants have been calculated, where possible, by using the method described by Hoye et al.<sup>[1]</sup> Melting points are uncorrected. IR spectra were recorded on neat samples with a Jasco FT/IR-4100 spectrometer. The mass spectra were recorded on a Amazon Speed (Bruker Daltonics) mass spectrometer in ESI mode. High-resolution mass spectra (HRMS) were performed on a LTQ Orbitrap XL (Thermo Scientific) mass spectrometer by the mass facility, PCN-ICMG, Grenoble. In general, extraction with the specific organic solvent was followed by appropriate aqueous washing, drying over Na<sub>2</sub>SO<sub>4</sub>, filtration, and evaporation of the solvent under reduced pressure.

Xenopus oocytes were prepared by surgical retrieval, and defolliculated by collagenase. Fifty nanoliters of mRNA were injected by oocytes and further incubated in modified Barth's buffer: 1 mM KCl, 0.82 mM MgSO<sub>4</sub>, 88 mM NaCl, 2.4 mM NaHCO<sub>3</sub>, 0.41 mM CaCl<sub>2</sub>, 16 mM HEPES, pH 7.4 supplemented with 100 U.ml<sup>-1</sup> of penicillin and streptomycin and 0.1 mg.ml<sup>-1</sup> of gentamycin). The composition of the ND96 buffer for TEVC recordings is: 96 mM NaCl, 2 mM KCl, 1.8 mM CaCl<sub>2</sub>, 1 mM MgCl<sub>2</sub>, 5 mM HEPES, pH 7.4 supplemented with 0.3 mM niflumic acid. Animal handling and experiments fully conformed to European regulations and were approved by the French Ministry of Higher Education and Research (APAFIS#4420-2016030813053199 v4 to CM). Authorization of the animal facility has been delivered by the Prefect of Isere (Authorization # D 38 185 10 001).

[1] - (a) Hoye, T. R.; Hanson, P. R.; Vyvyan, J. R. *J. Org. Chem.* **1994**, *59*, 4096-4103. (b) Hoye, T. R.; Zhao, H. *J. Org. Chem.* **2002**, *67*, 4014-4016

## Experimental procedures and spectroscopic data

**(2*S*,3*S*,8*R*,8*aR*)-8-Hydroxy-3-(2-methylallyl)-2-((*R*)-1-(2,4,6-triisopropylphenyl)ethoxy)hexahydroindolizin-5-(1*H*)-one (3b)**. Prepared from previously published procedure (see reference 6). Data for **3b** : mp 170-190 °C dec. (ether);  $[\alpha]_D^{20} +66.5$  (c 0.88, CHCl<sub>3</sub>); IR (KBr) 3348, 3074, 2961, 2922, 2869, 1614, 1461, 1410, 1370, 1326, 1210 cm<sup>-1</sup>; <sup>1</sup>H NMR (400 MHz, CDCl<sub>3</sub>) δ 7.04 (s, 1H), 6.92 (s, 1H), 5.02 (q, *J* = 6.7Hz, 1H), 4.66 (s, 1H), 4.54-4.61 (m, 2H), 4.06 (q, *J* = 2.0 Hz, 1H), 3.95 (q, *J* = 7.0 Hz, 1H), 3.78-3.90 (m, 2H), 3.10-3.22 (m, 1H), 2.84 (sept, *J* = 6.9 Hz, 1H), 2.14-2.44 (m, 5H), 1.84-2.04 (m, 3H), 1.71 (s, 3H), 1.52 (d, *J* = 6.7 Hz, 3H), 1.15-1.29 (m, 18H); <sup>13</sup>C NMR (100 MHz, CDCl<sub>3</sub>) δ 168.5 (C), 148.5 (C), 147.4 (C), 145.2 (C), 143.8 (C), 133.8 (C), 123.3 (2CH), 120.5, 111.7 (CH<sub>2</sub>), 74.8 (CH), 72.9 (CH), 64.5 (CH), 58.9 (CH), 56.9 (CH), 35.4 (CH<sub>2</sub>), 34.1 (CH), 33.2 (CH<sub>2</sub>), 29.3 (CH), 28.8 (CH), 27.9 (CH<sub>2</sub>), 26.2 (CH<sub>2</sub>), 25.4 (CH<sub>3</sub>), 25.2 (CH<sub>3</sub>), 25.1 (CH<sub>3</sub>), 24.4 (CH<sub>3</sub>), 24.3 (CH<sub>3</sub>), 24.2 (CH<sub>3</sub>), 23.1 (CH<sub>3</sub>), 22.7 (CH<sub>3</sub>); HRMS calcd. for C<sub>29</sub>H<sub>45</sub>NO<sub>3</sub>Na: 478.3297. Found: 478.3292 (MNa<sup>+</sup>).

**(2*S*,3*S*,8*R*,8*aR*)-8-(((Bromomethyl)dimethylsilyl)oxy)-3-(2-methylallyl)-2-((*R*)-1-(2,4,6-triisopropylphenyl)ethoxy)hexahydroindolizin-5(1*H*)-one, 7a** : To a solution of alcohol **3** (6.4 mg, 0.014 mmol, 1.0 equiv) in 250 μl of dry DCM, Et<sub>3</sub>N (0.030 ml, 0.22 mmol, 15.7 equiv) and (bromomethyl)chlorodimethylsilane (20 μl, 27.5 mg, 0.147 mmol, 10.5 equiv) were added. The reaction mixture was stirred at 50°C in a sealed tube for 2.5h. After cooling to room temperature, the reaction mixture was extracted with DCM to give 30.1 mg of crude material which, after silica gel purification (0–20% EtOAc in pentane), gave 8.1 mg (95% yield) of **7a** as colorless oil. IR (KBr) 3072, 2960, 2930, 1644, 1456, 1255, 1104, 1073, 842, 815 cm<sup>-1</sup>; <sup>1</sup>H NMR (500 MHz, CDCl<sub>3</sub>) δ 7.02 (s, 1H), 6.92 (s, 1H), 5.01 (q, *J* = 6.7 Hz, 1H), 4.65 (s, 1H), 4.58 (ddd, *J* = 6.2, 6.2, 8.7 Hz, 1H), 4.54 (s, 1H), 4.14 (ddd, *J* = 2.0, 2.0, 4.1 Hz, 1H), 3.95 (ddd, *J* = 6.3, 6.3, 7.4 Hz, 1H), 3.90–3.75 (m, 2H), 3.15 (sept, *J* = 6.8 Hz, 1H), 2.84 (sept, *J* = 6.8 Hz, 1H), 2.43 (s, 2H), 2.41 (ddd, *J* = 7.0, 11.8, 18.0 Hz, 1H), 2.29 (ddd, *J* = 1.5, 7.0, 18.0 Hz, 1H), 2.25–2.16 (m, 3H), 1.99–1.91 (m, 2H), 1.84 (dddd, *J* = 1.9, 7.3, 12.1, 14.1 Hz, 1H), 1.69 (s, 3H), 1.53 (d, *J* = 6.6 Hz, 3H), 1.33–1.15 (m, 18H), 0.26 (s, 6H); <sup>13</sup>C NMR (125 MHz, CDCl<sub>3</sub>) δ 168.1 (C), 147.3 (C), 144.8 (C), 143.8 (C), 133.7 (C), 123.2 (CH), 120.4 (CH), 111.5 (CH<sub>2</sub>), 74.6 (CH), 72.9 (CH), 66.1 (CH), 59.1 (CH), 56.7 (CH), 35.4 (CH<sub>2</sub>), 34.0 (CH), 33.4 (CH<sub>2</sub>), 29.2 (CH), 28.7 (CH), 28.2 (CH<sub>2</sub>), 26.2 (CH<sub>2</sub>), 25.1 (CH<sub>3</sub>),

24.9 (CH<sub>3</sub>), 24.3 (CH<sub>3</sub>), 24.0 (CH<sub>3</sub>), 23.9 (CH<sub>3</sub>), 22.8 (CH<sub>3</sub>), 22.4 (CH<sub>3</sub>), 15.7 (CH<sub>2</sub>), -2.49 (CH<sub>3</sub>), -2.51 (CH<sub>3</sub>); HRMS calcd for C<sub>32</sub>H<sub>53</sub>BrNO<sub>3</sub>Si: 606.2978, found: 606.2966 (MH<sup>+</sup>).

**(2*S*,3*S*,8*R*,8*aR*)-8-(((Chloromethyl)diphenylsilyloxy)-3-(2-methylallyl)-2-((*R*)-1-(2,4,6-triisopropylphenyl)ethoxy)hexahydroindolizin-5(1*H*)-one, 7b** : To a solution of alcohol **3** (5.4 mg, 0.012 mmol, 1.0 equiv) in 300  $\mu$ l of dry DCM were added Et<sub>3</sub>N (0.050 ml, 0.36 mmol, 30 equiv) and (chloromethyl)chlorodiphenylsilane (30.5 mg, 0.114 mmol, 9.5 equiv). The reaction mixture was stirred at 50°C in a sealed tube for 4.5h. After cooling to room temperature, the reaction mixture was quenched with water and extracted with pentane to give 28.1 mg of crude material. Purification over silica gel (0–20% of EtOAc in pentane) gave 5.7 mg (66%) of **7b** as colorless oil (in mixture with  $\approx$ 10% of hydrogenated methylallyl side chain from partially purified starting material). IR (KBr) 3071, 3057, 2960, 2926, 2868, 1616, 1460, 1121, 1073 cm<sup>-1</sup>; <sup>1</sup>H NMR (500 MHz, CDCl<sub>3</sub>)  $\delta$  7.65–7.58 (m, 4H), 7.52–7.46 (m, 2H), 7.44–7.37 (m, 4H), 7.02 (s, 1H), 6.89 (s, 1H), 4.97 (q, *J* = 6.7 Hz, 1H), 4.65 (ddd, *J* = 6.6, 6.6, 7.8 Hz, 1H), 4.64 (s, 1H), 4.52 (s, 1H), 4.32 (ddd, *J* = 1.9, 1.9, 4.2 Hz, 1H), 4.05 (ddd, *J* = 6.2, 6.2, 7.4 Hz, 1H), 3.80 (ddd, *J* = 2.8, 7.5, 8.3 Hz, 1H), 3.84–3.72 (m, 1H), 3.30 (d, *J* = 2.1 Hz, 2H), 3.15–3.03 (m, 1H), 2.84 (sept., *J* = 6.9 Hz, 1H), 2.46 (ddd, *J* = 7.2, 11.7, 17.8 Hz, 1H), 2.34–2.23 (m, 2H), 2.22–2.15 (m, 2H), 1.90 (ddd, *J* = 6.0, 8.3, 12.5 Hz, 1H), 1.85 (dddd, *J* = 1.7, 4.2, 7.2, 13.6 Hz, 1H), 1.74 (dddd, *J* = 2.0, 7.3, 12.1, 13.9 Hz, 1H), 1.67 (s, 3H), 1.47 (d, *J* = 6.7 Hz, 3H), 1.31–1.12 (m, 18H); <sup>13</sup>C NMR (125 MHz, CDCl<sub>3</sub>)  $\delta$  168.1 (C), 147.2 (C), 143.7 (C), 134.9 (CH), 134.0 (C), 131.8 (C), 131.7 (C), 131.0 (CH), 130.90 (CH), 130.92 (CH), 128.3 (CH), 128.23 (CH), 128.21 (CH), 123.1 (CH), 120.3 (CH), 111.4 (CH<sub>2</sub>), 75.1 (CH), 73.3 (CH), 66.9 (CH), 59.2 (CH), 56.6 (CH), 35.3 (CH<sub>2</sub>), 34.0 (CH), 33.6 (CH<sub>2</sub>), 29.3 (CH), 28.8 (CH), 27.8 (CH<sub>2</sub>), 27.4 (CH<sub>2</sub>), 26.3 (CH<sub>2</sub>), 25.1 (CH<sub>3</sub>), 24.9 (CH<sub>3</sub>), 24.8 (CH<sub>3</sub>), 24.0 (CH<sub>3</sub>), 23.9 (CH<sub>3</sub>), 22.6 (CH<sub>3</sub>), 22.5 (CH<sub>3</sub>); HRMS calcd for C<sub>42</sub>H<sub>57</sub>ClNO<sub>3</sub>Si: 686.3791, found: 686.3787 (MH<sup>+</sup>).

**(2*S*,3*S*,8*R*,8*aR*)-8-(((Chloromethyl)diisopropylsilyloxy)-3-(2-methylallyl)-2-((*R*)-1-(2,4,6-triisopropylphenyl)ethoxy)hexahydroindolizin-5(1*H*)-one, 7c** : To a solution of indolizidinone **3** (925.0 mg, 2.03 mmol, 1.0 equiv) in 5 ml of dry DCM was added 680 mg of a chloro(chloromethyl)diisopropylsilane 134 (3.41 mmol, 1.7 equiv). Also, imidazole (300 mg, 4.40 mmol, 2.1 equiv) and DMAP (45 mg, 0.37 mmol, 0.18 equiv) were added and the solution was stirred at 60°C in a sealed tube for 2h. Additional 1.1 g of the silyl reagent 134

were added in 4-time portions with 2-hour intervals (5.52 mmol, 2.7 equiv). The reaction was followed with TLC until the disappearance of the starting material. Then it was quenched with water and brine, and the aqueous layer was extracted 3 times with pentane. The combined organic phases were dried over MgSO<sub>4</sub> and concentrated under reduced pressure to give 1.7 g of crude material which was purified over silica gel (0–20% EtOAc/cyclohexane) leaving 1.06 g of pure silyl ether **7c** (85%), along with 100.0 mg of the siloxane byproduct **S1** (7%). Analytical data for **7c** : IR (KBr)  $\nu$  3582, 3274, 2959, 2868, 1645, 1458, 1070 cm<sup>-1</sup>; <sup>1</sup>H NMR (400 MHz, CDCl<sub>3</sub>)  $\delta$  7.03 (s, 1H), 6.92 (s, 1H), 5.02 (q,  $J$  = 6.6 Hz, 1H), 4.65 (s, 1H), 4.60 (ddd,  $J$  = 6.0, 6.0, 8.5 Hz, 1H), 4.54 (s, 1H), 4.33 (ddd,  $J$  = 1.7, 2.4, 4.2 Hz, 1H), 4.02 (ddd,  $J$  = 5.7, 6.0, 7.3 Hz, 1H), 3.83 (ddd,  $J$  = 2.4, 8.0, 8.0 Hz, 1H), 3.87–3.78 (m, 1H), 3.20–3.08 (m, 1H), 2.94 (s, 2H), 2.84 (sept,  $J$  = 6.9 Hz, 1H), 2.44 (ddd,  $J$  = 6.9, 12.1, 18.0 Hz, 1H), 2.32 (ddd,  $J$  = 1.6, 7.2, 18.0 Hz, 1H), 2.28–2.16 (m, 3H), 2.04 (dddd,  $J$  = 1.6, 4.2, 6.9, 13.9 Hz, 1H), 1.99 (dddd,  $J$  = 5.7, 8.0, 12.6 Hz, 1H), 1.86 (dddd,  $J$  = 1.7, 7.2, 12.1, 13.9 Hz, 1H), 1.67 (s, 3H), 1.50 (d,  $J$  = 6.6 Hz, 3H), 1.32–1.14 (m, 19H), 1.11–1.00 (m, 12H), 0.79 (m, 1H); <sup>13</sup>C NMR (100 MHz, CDCl<sub>3</sub>)  $\delta$  168.0 (C), 148.3 (C), 147.2 (C), 144.5 (C), 143.7 (C), 133.9 (C), 123.0 (CH), 120.3 (CH), 111.4 (CH<sub>2</sub>), 75.0 (CH), 73.1 (CH), 66.2 (CH), 59.4 (CH), 56.7 (CH), 35.2 (CH<sub>2</sub>), 33.8 (CH), 33.6 (CH<sub>2</sub>), 29.2 (CH), 28.3 (CH), 28.3 (CH<sub>2</sub>), 26.3 (CH<sub>2</sub>), 26.1 (CH<sub>2</sub>), 25.1 (CH<sub>3</sub>), 24.9 (CH<sub>3</sub>), 24.8 (CH<sub>3</sub>), 24.0 (CH<sub>3</sub>), 23.9 (CH<sub>3</sub>), 23.8 (CH<sub>3</sub>), 22.6 (CH<sub>3</sub>), 22.5 (CH<sub>3</sub>), 17.5 (CH<sub>3</sub>), 17.4 (CH<sub>3</sub>), 17.1 (CH<sub>3</sub>), 13.1 (CH<sub>3</sub>), 12.1 (CH<sub>3</sub>), 11.9 (CH<sub>3</sub>); HRMS calcd for C<sub>36</sub>H<sub>61</sub>ClNO<sub>3</sub>Si: 618.4109. Found: 618.4123 (MH<sup>+</sup>).

Analytical data for **S1**, (2*S*,3*S*,8*R*,8*aR*)-8-((3-Hydroxy-1,1,3,3-tetraisopropylidisiloxanyl)oxy)-3-(2-methylallyl)-2-((*R*)-1-(2,4,6-triisopropylphenyl)ethoxy)hexahydroindolizin-5(1*H*)-one : IR (KBr)  $\nu$  3305, 2958, 2866, 1621, 1464 cm<sup>-1</sup>; <sup>1</sup>H NMR (500 MHz, CDCl<sub>3</sub>)  $\delta$  7.03 (s, 1H), 6.92 (s, 1H), 5.00 (q,  $J$  = 6.7 Hz, 1H), 4.64 (s, 1H), 4.59 (ddd,  $J$  = 6.1, 6.1, 8.9 Hz, 1H), 4.52 (s, 1H), 4.33 (ddd,  $J$  = 1.9, 2.6, 4.2 Hz, 1H), 4.04 (ddd,  $J$  = 5.9, 5.9, 7.3 Hz, 1H), 3.82 (ddd,  $J$  = 2.5, 7.6, 7.6 Hz, 1H), 3.87–3.77 (m, 1H), 3.14 (sept,  $J$  = 6.9 Hz, 1H), 2.84 (sept,  $J$  = 6.9 Hz, 1H), 2.50 (ddd,  $J$  = 7.2, 12.0, 18.6 Hz, 1H), 2.39–2.29 (m, 2H), 2.24 (A of ABX,  $J$  = 8.7, 14.2 Hz, 1H), 2.17 (B of ABX,  $J$  = 5.0, 14.2 Hz, 1H), 2.10 (dddd,  $J$  = 1.5, 4.3, 7.2, 13.5 Hz, 1H), 1.97 (ddd,  $J$  = 5.6, 8.1, 13.1 Hz, 1H), 1.82 (dddd,  $J$  = 1.3, 7.1, 11.9, 13.5 Hz, 1H), 1.66 (s, 3H), 1.52 (d,  $J$  = 6.7 Hz, 3H), 1.32–1.13 (m, 18H), 1.10–1.01 (m, 24H), 1.01–0.86 (m, 4H); <sup>13</sup>C NMR (125 MHz, CDCl<sub>3</sub>)  $\delta$  168.6 (C), 148.3 (C), 147.2 (C), 144.4 (C), 143.7 (C), 134.2 (C), 123.1 (CH), 120.3 (CH), 111.3 (CH<sub>2</sub>), 75.2 (CH), 73.3 (CH), 65.1 (CH), 59.6 (CH), 56.6 (CH), 35.2 (CH<sub>2</sub>), 34.0 (CH), 33.7 (CH<sub>2</sub>), 29.3 (CH), 28.9 (CH), 28.1 (CH<sub>2</sub>), 26.4 (CH<sub>2</sub>), 25.2 (CH<sub>3</sub>), 24.9 (CH<sub>3</sub>), 24.7 (CH<sub>3</sub>), 24.0 (CH<sub>3</sub>), 23.9 (CH<sub>3</sub>), 23.8 (CH<sub>3</sub>), 22.5 (CH<sub>3</sub>), 22.4 (CH<sub>3</sub>),

17.5 (CH<sub>3</sub>), 17.4 (CH<sub>3</sub>), 17.35 (CH<sub>3</sub>), 17.30 (CH<sub>3</sub>), 13.6 (CH), 13.5 (CH), 13.4 (CH); HRMS calcd for C<sub>41</sub>H<sub>74</sub>NO<sub>5</sub>Si<sub>2</sub>: 716.5100. Found: 716.5075 (MH<sup>+</sup>).

**(1*R*,5*S*,8*S*,9*S*,10*aR*)-3,3-Dimethyl-8-(2-methylallyl)-9-((*R*)-1-(2,4,6-triisopropylphenyl)ethoxy) hexahydro-1*H*-1,5-methanopyrrolo[1,2-*f*][1,6,2]oxazasilocin-6(3*H*)-one, **8a** :** To a solution of silyl ether **7a** (5.0 mg, 0.008 mmol, 1.0 equiv) in 300 µl of dry THF at -78°C was added 60 µl of LiHMDS solution in THF (1.0 M, 0.06 mmol, 7.5 equiv). The reaction temperature was gradually increased to -15°C over 1 hour. TLC analysis (EtOAc) showed a complete consumption of starting material. The reaction mixture was quenched with water and extracted with DCM. The organic solution was dried on MgSO<sub>4</sub> and the solvent was removed under reduced pressure to give 5.9 mg of crude material. Purification over silica gel (10–100% EtOAc in pentane) produced 2.8 mg (65%) of **8a** as colorless oil : IR (KBr)  $\nu$  3055, 2960, 2931, 2869, 1642, 1455, 1428, 1081, cm<sup>-1</sup>; <sup>1</sup>H NMR (500 MHz, CDCl<sub>3</sub>)  $\delta$  7.03 (s, 1H), 6.92 (s, 1H), 5.02 (q, *J* = 6.8 Hz, 1H), 4.67 (s, 1H), 4.57 (s, 1H), 4.56 (ddd, *J* = 5.8, 6.2, 9.4 Hz, 1H), 4.26 (ddd, *J* = 2.2, 2.2, 4.6 Hz, 1H), 3.90–3.80 (m, 3H), 3.16 (sept, *J* = 6.8 Hz, 1H), 2.84 (sept, *J* = 6.8 Hz, 1H), 2.80 (dddd, *J* = 2.0, 3.1, 5.3, 7.1 Hz, 1H), 2.41 (ddd, *J* = 7.8, 7.8, 13.6 Hz, 1H), 2.33 (A of ABX, *J* = 5.8, 14.2 Hz, 1H), 2.27 (B of ABX, *J* = 9.4, 14.2 Hz, 1H), 1.98–1.90 (m, 3H), 1.72 (s, 3H), 1.54 (d, *J* = 6.8 Hz, 3H), 1.34–1.12 (m, 19H), 0.94 (dd, *J* = 7.1, 14.8 Hz, 1H), 0.14 (s, 3H), -0.17 (s, 3H). <sup>13</sup>C NMR (125 MHz, CDCl<sub>3</sub>)  $\delta$  170.8 (C), 148.5 (C), 147.4 (C), 145.3 (C), 143.7 (C), 133.3 (C), 123.2 (CH), 120.3 (CH), 111.6 (CH<sub>2</sub>), 74.2 (CH), 72.4 (CH), 66.6 (CH), 60.4 (CH), 56.8 (CH), 35.3 (CH<sub>2</sub>), 34.0 (CH), 33.2 (CH), 33.0 (CH<sub>2</sub>), 32.7 (CH<sub>2</sub>), 29.2 (CH), 28.5 (CH), 25.1 (CH<sub>3</sub>), 25.0 (CH<sub>3</sub>), 24.9 (CH<sub>3</sub>), 24.1 (CH<sub>3</sub>), 24.0 (CH<sub>3</sub>), 23.9 (CH<sub>3</sub>), 22.8 (CH<sub>3</sub>), 22.3 (CH<sub>3</sub>), 19.8 (CH<sub>2</sub>), 2.4 (CH<sub>3</sub>), 2.1 (CH<sub>3</sub>). HRMS calcd for C<sub>32</sub>H<sub>53</sub>NO<sub>3</sub>Si : 526.3711. Found: 526.3698 (MH<sup>+</sup>).

**(1*R*,5*S*,8*S*,9*S*,10*aR*)-3,3-Diisopropyl-8-(2-methylallyl)-9-((*R*)-1-(2,4,6-triisopropylphenyl)ethoxy)hexahydro-1*H*-1,5-methanopyrrolo[1,2-*f*][1,6,2]oxazasilocin-6(3*H*)-one **8c** :** To a solution of silyl ether **7c** (1.0 g, 1.62 mmol, 1.0 equiv) in 15 ml THF at -78°C was added a freshly prepared solution of 0.4M LiHMDS in THF (16 ml, 6.4 mmol, 3.9 equiv). The reaction was allowed to warm to -20°C over 1h30 min, followed by TLC and quenched with brine at -25 °C. The aqueous layer was extracted 3 times with DCM. After drying over MgSO<sub>4</sub>, the organic phase was concentrated under vacuum to leave 932.2 mg of crude material which was purified over silica gel (0–10% EtOAc/cyclohexane) to give 860.0 mg of pure cyclic silyl ether **8c** (91%) : IR (KBr)  $\nu$ , 2959, 2866, 1644, 1462, 1610 cm<sup>-1</sup>; <sup>1</sup>H

NMR (500 MHz, CDCl<sub>3</sub>) δ 7.02 (s, 1H), 6.91 (s, 1H), 5.03 (q, *J* = 6.7 Hz, 1H), 4.66 (s, 1H), 4.61–4.54 (m, 2H), 4.27 (ddd, *J* = 1.9, 1.9, 4.2 Hz, 1H), 3.96 (ddd, *J* = 5.0, 6.6, 7.7 Hz, 1H), 3.86 (sept, *J* = 6.9 Hz, 1H), 3.81 (ddd, *J* = 2.4, 8.1, 8.1 Hz, 1H), 3.16 (sept, *J* = 7.0 Hz, 1H), 2.84 (sept, *J* = 6.9 Hz, 1H), 2.79 (dddd, *J* = 1.3, 2.3, 5.8, 7.7 Hz, 1H), 2.45 (ddd, *J* = 8.0, 8.0, 12.7 Hz, 1H), 2.31 (A of ABX, *J* = 6.1, 14.1, 1H), 2.27 (B of ABX, *J* = 8.7, 14.1 Hz, 1H), 2.01–1.89 (m, 3H), 1.71 (s, 3H), 1.53 (d, *J* = 6.7 Hz, 3H), 1.31–1.14 (m, 19 H), 1.04–0.91 (m, 8H), 0.80 (d, *J* = 7.4 Hz, 3H), 0.76 (d, *J* = 7.4 Hz, 3H), 0.61 (sept, *J* = 7.5 Hz, 1H). <sup>13</sup>C NMR (125 MHz, CDCl<sub>3</sub>) δ 170.9 (C), 148.4 (C), 147.2 (C), 145.1 (C), 143.7 (C), 133.3 (C), 123.1 (CH), 120.3 (CH), 111.4 (CH<sub>2</sub>), 74.3 (CH), 72.4 (CH), 66.0 (CH), 60.8 (CH), 56.8 (CH), 35.3 (CH<sub>2</sub>), 34.0 (CH), 32.9 (CH<sub>2</sub>), 32.7 (CH), 29.1 (CH), 28.4 (CH), 25.1 (CH<sub>3</sub>), 24.9 (CH<sub>3</sub>), 24.0 (CH<sub>3</sub>), 23.9 (CH<sub>3</sub>), 22.8 (CH<sub>3</sub>), 22.4 (CH<sub>3</sub>), 17.4 (CH<sub>3</sub>), 17.3 (CH<sub>3</sub>), 16.6 (CH<sub>3</sub>), 16.5 (CH<sub>3</sub>), 13.9 (CH), 13.4 (CH), 13.3 (CH<sub>2</sub>). HRMS calcd for C<sub>36</sub>H<sub>60</sub>NO<sub>3</sub>Si: 582.4342. Found: 582.4348 (MH<sup>+</sup>).

**(2*S*,2*aS*,4*R*,5*aR*,6*S*,8*R*,8*aR*)-8-Hydroxy-6-((hydroxydiisopropylsilyl)methyl)-4-methyl-2-((*R*)-1-(2,4,6-triisopropylphenyl)ethoxy)decahydro-1*H*-pyrrolo[2,1,5-*de*]quinolizin-4-yl formate **9** and (1*S*,5*R*,5*aR*,7*S*,7*aS*,9*R*,10*aR*)-3,3-Diisopropyl-9-methyl-7-((*R*)-1-(2,4,6-triisopropylphenyl)ethoxy)dodecahydro-1,5-methano[1,6,2]oxazasilocino[7,6,5-*cd*]indolizin-9-yl formate **10** and (2*S*,3*S*,6*S*,8*R*,8*aR*)-6-((Hydroxydiisopropylsilyl)methyl)-3-(2-methylallyl)-2-((*R*)-1-(2,4,6-triisopropylphenyl)ethoxy)octahydroindolizin-8-ol **11** :**

To a solution of lactam **8c** (0.0020 g, 0.034 mmol.) in 0.300 ml of ether at –5 °C was added a 1M solution LiAlH<sub>4</sub> in ether (0,050 ml, 0.050 mmol, 1.5 equiv). The reaction was stirred at –5°C and, followed by TLC (20% AcOEt in pentane). Two additional amounts (0,050 ml and 0.025 ml) of LiAlH<sub>4</sub> was added each following hours to complete the reaction which was then quench at 0°C with formic acid (0.250 ml) for 1h. Solid K<sub>2</sub>CO<sub>3</sub> was then added carefully until no more gas evolution followed by 1 ml of brine. Usual extraction with ether left 0.0217 g of crude material which was purified by silica gel chromatography (0–50% AcOEt in pentane) to give 0.0012 g of over reduced lactam **11**, 0.0018 g of silyl ether **10** and 0.0050 g of silanol **9**.

Data for **9** : IR (KBr) ν 3398, 2959, 2866, 1722, 1607, 1462 cm<sup>-1</sup>; <sup>1</sup>H NMR (500 MHz, CDCl<sub>3</sub>) δ 8.03 (s, 1H), 7.03 (d, *J* = 1.6 Hz, 1H), 6.94 (d, *J* = 1.6 Hz, 1H), 5.00 (q, *J* = 6.8 Hz, 1H), 3.99 (ddd, *J* = 4.3, 6.7, 9.3 Hz, 1H), 3.89 (sept, *J* = 6.8 Hz, 1H), 3.78 (app s, 1H), 3.31 (ddd, *J* = 1.3, 8.4, 9.3 Hz, 1H), 3.25 (ddd, *J* = 3.9, 6.7, 12.8 Hz, 1H), 3.15 (sept, *J* = 6.8 Hz, 1H), 2.85 (sept, *J* = 6.9 Hz, 1H), 2.81 (app. dd, *J* = 3.0, 12.7 Hz, 1H), 2.23 (dd, *J* = 12.8, 12.8

Hz, 1H), 2.14 (ddd,  $J = 8.9, 8.9, 13.1$  Hz, 1H), 2.08 (ddd,  $J = 1.9, 3.4, 14.8$  Hz, 1H), 2.00 (dd,  $J = 12.8, 12.8$  Hz, 1H), 1.80–1.66 (m, 4H), 1.62 (ddd,  $J = 2.4, 6.0, 14.8$  Hz, 1H), 1.57 (s, 3H), 1.49 (d,  $J = 6.8$  Hz, 3H), 1.32–1.17 (m, 18 H), 1.10 (dd,  $J = 10.4$  Hz, 15.3 Hz, 1H), 1.05–0.93 (m, 12H), 0.86–0.80 (m, 3H).  $^{13}\text{C}$  NMR (125 MHz,  $\text{CDCl}_3$ )  $\delta$  160.3 (CH), 148.8 (C), 147.3 (C), 145.9 (C), 133.1 (C), 123.2 (CH), 120.4 (CH), 84.7 (C), 74.5 (CH), 71.1 (CH), 67.1 (CH), 60.4 (CH), 59.2 (CH), 53.9 (CH), 33.9 (CH), 33.7 (CH<sub>2</sub>), 32.6 (CH<sub>2</sub>), 31.9 (CH), 31.0 (CH<sub>2</sub>), 30.4 (CH<sub>2</sub>), 29.1 (CH), 28.0 (CH), 25.0 (CH<sub>3</sub>), 24.9 (CH<sub>3</sub>), 24.6 (CH<sub>3</sub>), 24.5 (CH<sub>3</sub>), 23.9 (CH<sub>3</sub>), 23.3 (CH<sub>3</sub>), 22.9 (CH<sub>3</sub>), 20.7 (CH<sub>2</sub>), 17.7 (CH<sub>3</sub>), 17.5 (CH<sub>3</sub>), 17.4 (CH<sub>3</sub>), 13.3 (CH), 13.2 (CH). HRMS calcd for  $\text{C}_{37}\text{H}_{64}\text{NO}_5\text{Si}$ : 630.4554. Found: 630.4565 ( $\text{MH}^+$ ).

Data for **10** : IR (KBr)  $\nu$  2959, 2864, 1722, 1607, 1461  $\text{cm}^{-1}$ ;  $^1\text{H}$  NMR (500 MHz,  $\text{CDCl}_3$ )  $\delta$  8.05 (s, 1H), 7.04 (d,  $J = 1.8$  Hz, 1H), 6.93 (d,  $J = 1.8$  Hz, 1H), 4.99 (q,  $J = 6.8$  Hz, 1H), 3.97 (app s, 1H), 3.93–3.84 (m, 2H), 3.23–3.08 (m, 3H), 2.92–2.78 (m, 2H), 2.23–2.11 (m, 2H), 2.01 (dd,  $J = 13.1, 13.1$  Hz, 1H), 1.96 (br s, 1H), 1.76–1.60 (m, 5H), 1.58 (s, 3H), 1.48 (d,  $J = 6.8$  Hz, 3H), 1.30–1.14 (m, 18H), 1.05 (dd,  $J = 7.8, 15.0$  Hz, 1H), 1.01–0.78 (m, 14H), 0.53 (ddd,  $J = 2.0, 2.0, 15.0$  Hz, 1H).  $^{13}\text{C}$  NMR (125 MHz,  $\text{CDCl}_3$ )  $\delta$  160.3 (CH), 148.8 (C), 147.2 (C), 146.0 (C), 133.2 (C), 123.1 (CH), 120.2 (CH), 85.2 (C), 74.3 (CH), 70.7 (CH), 67.9 (CH), 60.1 (CH), 58.3 (CH), 54.7 (CH), 34.0 (CH), 33.4 (CH<sub>2</sub>), 32.2 (CH<sub>2</sub>), 31.5 (CH<sub>2</sub>), 31.2 (CH), 30.2 (CH<sub>2</sub>), 29.2 (CH), 28.0 (CH), 25.1 (CH<sub>3</sub>), 24.8 (CH<sub>3</sub>), 24.7 (CH<sub>3</sub>), 24.3 (CH<sub>3</sub>), 24.0 (CH<sub>3</sub>), 23.8 (CH<sub>3</sub>), 23.4 (CH<sub>3</sub>), 22.9 (CH<sub>3</sub>), 17.9 (CH<sub>3</sub>), 17.6 (CH<sub>3</sub>), 17.2 (CH<sub>3</sub>), 16.8 (CH<sub>3</sub>), 15.1 (CH), 14.8 (CH<sub>2</sub>), 13.1 (CH). HRMS calcd for  $\text{C}_{37}\text{H}_{62}\text{NO}_4\text{Si}$  : 612.4448. Found: 612.4451 ( $\text{MH}^+$ ).

Data for **11** : IR (KBr)  $\nu$  3366, 2958, 2865, 1608, 1462, 1382, 1261, 881  $\text{cm}^{-1}$ ;  $^1\text{H}$  NMR (500 MHz,  $\text{CDCl}_3$ )  $\delta$  7.04 (d,  $J = 1.8$  Hz, 1H), 6.95 (d,  $J = 1.8$  Hz, 1H), 5.04 (q,  $J = 6.8$  Hz, 1H), 4.74 (br s, 2H), 4.00 (ddd,  $J = 6.3, 6.3, 8.7$  Hz, 1H), 3.91 (sept,  $J = 6.8$  Hz, 1H), 3.77 (app s, 1H), 3.38 (ddd,  $J = 3.3, 6.3, 9.3$  Hz, 1H), 3.19 (sept,  $J = 6.8$  Hz, 1H), 2.96 (ddd,  $J = 2.3, 6.8, 9.2$  Hz, 1H), 2.86 (sept,  $J = 6.9$  Hz, 1H), 2.78 (dd,  $J = 3.5, 11.3$  Hz, 1H), 2.48 (app d,  $J = 11.3$  Hz, 1H), 2.31 (app d,  $J = 15.4$  Hz, 1H), 2.22–2.12 (m, 2H), 2.00–1.88 (m, 2H), 1.77 (ddd,  $J = 6.3, 9.2, 12.9$  Hz, 1H), 1.72 (s, 3H), 1.54 (ddd,  $J = 2.5, 6.2, 14.5$  Hz, 1H), 1.50 (d,  $J = 6.8$  Hz, 3H), 1.34–1.13 (m, 18H), 1.07–0.80 (m, 15H), 0.69 (dd,  $J = 6.7, 15.0$  Hz, 1H).  $^{13}\text{C}$  NMR (125 MHz,  $\text{CDCl}_3$ )  $\delta$  148.8 (C), 147.2 (C), 145.7 (C), 145.3 (C), 133.5 (C), 123.1 (CH), 120.4 (CH), 111.3 (CH<sub>2</sub>), 75.8 (CH), 71.2 (CH), 68.2 (CH), 63.8 (CH), 61.6 (CH), 56.7 (CH<sub>2</sub>), 36.3 (CH<sub>2</sub>), 33.9 (CH), 31.2 (CH<sub>2</sub>), 31.1 (CH<sub>2</sub>), 29.1 (CH), 28.4 (CH), 28.2 (CH), 25.3 (CH<sub>3</sub>), 24.9 (CH<sub>3</sub>), 24.8 (CH<sub>3</sub>), 24.5 (CH<sub>3</sub>), 23.9 (CH<sub>3</sub>), 23.8 (CH<sub>3</sub>), 23.2 (CH<sub>3</sub>), 22.9 (CH<sub>3</sub>), 17.9 (CH<sub>2</sub>),



17.6 (CH<sub>3</sub>), 17.5 (CH<sub>3</sub>), 17.3 (CH<sub>3</sub>), 13.4 (CH), 13.3 (CH). HRMS calcd for C<sub>36</sub>H<sub>64</sub>NO<sub>3</sub>Si: 586.4655. Found: 586.4652 (MH<sup>+</sup>).

**(1*S*,5*R*,5*aR*,7*S*,7*aS*,9*R*,10*aR*)-3,3-Diisopropyl-9-methyl-7-((*R*)-1-(2,4,6-triisopropylphenyl)ethoxy)dodecahydro-1,5-methano[1,6,2]oxazasilocino[7,6,5-*cd*]indolizin-9-ol** **12** and **(1*S*,2*aR*,3*R*,5*S*,5*aR*,7*R*,8*aS*)-5-((Hydroxydiisopropylsilyl)methyl)-7-methyl-1-((*R*)-1-(2,4,6-**

**triisopropylphenyl)ethoxy)decahydro-1*H*-pyrrolo[2,1,5-*de*]quinolizine-3,7-diol** **13** : A solution of formate **9** in 2.7 ml of methanol with 0.280 g of K<sub>2</sub>CO<sub>3</sub> was stirred at room temperature for 1h. After dilution with brine the mixture was processed in the usual way with methylenechloride to leave 0.0892 g of the crude mixture as a pale yellow oil. Purification on silica gel (0–50% AcOEt in pentane) gave 0.0452 g of **12** and 0.0379 g of **13**.

Data for **12** : IR (KBr)  $\nu$  3365, 2959, 2864, 1608, 1461 cm<sup>-1</sup>; <sup>1</sup>H NMR (400 MHz, CDCl<sub>3</sub>)  $\delta$  7.04 (d, *J* = 2.0 Hz, 1H), 6.92 (d, *J* = 2.0 Hz, 1H), 4.98 (q, *J* = 6.9 Hz, 1H), 3.96 (br s, 1H), 3.93–3.85 (m, 2H), 3.20–3.07 (m, 3H), 2.86 (sept, *J* = 6.9 Hz, 1H), 2.77 (ddd, *J* = 0.8, 3.0, 12.8 Hz, 1H), 2.16 (ddd, *J* = 9.2, 9.2, 12.6 Hz, 1H), 1.95 (br s, 1H), 1.82 (dd, *J* = 12.8, 12.8 Hz, 1H), 1.75–1.60 (m, 4H), 1.47 (d, *J* = 6.9 Hz, 3H), 1.40 (ddd, *J* = 2.0, 3.7, 13.4 Hz, 1H), 1.31–1.11 (m, 22H), 1.07–0.95 (m, 5H), 0.95–0.87 (m, 4H), 0.87–0.78 (m, 6H), 0.53 (ddd, *J* = 1.9, 1.9, 15.0, 1H). <sup>13</sup>C NMR (125 MHz, CDCl<sub>3</sub>)  $\delta$  148.8 (C), 147.1 (C), 146.0 (C), 133.4 (C), 123.1 (CH), 120.2 (CH), 74.3 (CH), 71.6 (C), 70.6 (CH), 68.0 (CH), 60.9 (CH), 59.2 (CH), 54.5 (CH), 36.8 (CH<sub>2</sub>), 34.0 (CH), 33.4 (CH<sub>2</sub>), 32.3 (CH<sub>2</sub>), 31.6 (CH<sub>2</sub>), 31.4 (CH), 29.2 (CH), 28.0 (CH), 25.7 (CH<sub>3</sub>), 25.2 (CH<sub>3</sub>), 24.8 (CH<sub>3</sub>), 24.7 (CH<sub>3</sub>), 24.3 (CH<sub>3</sub>), 24.0 (CH<sub>3</sub>), 23.8 (CH<sub>3</sub>), 23.3 (CH<sub>3</sub>), 17.9 (CH<sub>3</sub>), 17.7 (CH<sub>3</sub>), 17.2 (CH<sub>3</sub>), 16.8 (CH<sub>3</sub>), 15.0 (CH), 14.8 (CH<sub>2</sub>), 13.1 (CH). HRMS calcd for C<sub>36</sub>H<sub>62</sub>NO<sub>3</sub>Si: 584.4499. Found: 584.4500 (MH<sup>+</sup>).

Data for **13** : IR (KBr)  $\nu$  3375, 2959, 2865, 1607, 1462 cm<sup>-1</sup>; <sup>1</sup>H NMR (500 MHz, CDCl<sub>3</sub>)  $\delta$  7.03 (d, *J* = 1.8 Hz, 1H), 6.93 (d, *J* = 1.8 Hz, 1H), 5.00 (q, *J* = 6.9 Hz, 1H), 3.99 (ddd, *J* = 4.2, 6.6, 9.4 Hz, 1H), 3.91 (sept, *J* = 6.9 Hz, 1H), 3.76 (app s, 1H), 3.28 (ddd, *J* = 1.5, 8.3, 8.3 Hz, 1H), 3.24–3.09 (m, 2H), 2.85 (sept, *J* = 6.9 Hz, 1H), 2.75 (app dd, *J* = 3.0, 13.1 Hz, 1H), 2.13 (ddd, *J* = 8.3, 9.1, 13.0 Hz, 1H), 2.07 (br d, *J* = 15.2 Hz, 1H), 1.86 (dd, *J* = 13.1, 13.1 Hz, 1H), 1.80–1.59 (m, 4H), 1.48 (d, *J* = 6.9 Hz, 3H), 1.43 (ddd, *J* = 2.1, 3.8, 13.5 Hz, 1H), 1.33–1.16 (m, 22H), 1.11 (dd, *J* = 10.5, 15.3 Hz, 1H), 1.06–0.92 (m, 13H), 0.91–0.81 (m, 2H). <sup>13</sup>C NMR (125 MHz, CDCl<sub>3</sub>)  $\delta$  148.8 (C), 147.2 (C), 145.9 (C), 133.3 (C), 123.2 (CH), 120.3 (CH), 74.5 (CH), 71.3 (C), 71.0 (CH), 67.2 (CH), 61.2 (CH), 60.1 (CH), 53.7 (CH), 37.2

(CH<sub>2</sub>), 33.9 (CH), 33.6 (CH<sub>2</sub>), 32.8 (CH<sub>2</sub>), 32.0 (CH<sub>2</sub>), 31.0 (CH), 29.1(CH<sub>2</sub>), 28.0 (CH), 25.8 (CH<sub>3</sub>), 25.0 (CH<sub>3</sub>), 24.9 (CH<sub>3</sub>), 24.6 (CH<sub>3</sub>), 24.5 (CH<sub>3</sub>), 23.9 (CH<sub>3</sub>), 23.2 (CH<sub>3</sub>), 20.8 (CH<sub>2</sub>), 17.7 (CH<sub>3</sub>), 17.5 (CH<sub>3</sub>), 17.4 (CH<sub>3</sub>), 13.4 (CH), 13.2 (CH). HRMS calcd for C<sub>36</sub>H<sub>64</sub>NO<sub>4</sub>Si: 602.4605. Found: 602.4611 (MH<sup>+</sup>).

**(1*S*,2*aR*,3*R*,5*S*,5*aR*,7*R*,8*aR*)-5,7-Dimethyl-1-((*R*)-1-(2,4,6-**

**triisopropylphenyl)ethoxy)decahydro-1*H*-pyrrolo[2,1,5-*de*]quinolizine-3,7-diol **14** :**  
Vaska's catalyst (IrCl(CO)[P(C<sub>6</sub>H<sub>5</sub>)<sub>3</sub>]<sub>2</sub>, 4.2 mg, 0.0054 mmol, 2.7 mol%) was added to a solution of lactam **8c** (0.1173 g, 0.201 mmol.) in 4.6 ml of toluene at RT. The obtained yellow suspension was stirred at RT for 5 min before the addition of TMDS (89  $\mu$ l, 0.503 mmol., 2.5 eq.). The reaction mixture was stirred for more 5 min before noticing the total disappearance of starting material by TLC. Formic acid (2.3 ml) was then added and the solution was vigorously stirred for 1.5 h at RT. The resultant solution was diluted with Et<sub>2</sub>O and then basified with saturated K<sub>2</sub>CO<sub>3</sub> solution and extracted with Et<sub>2</sub>O in the usual manner. High vacuum removal of the excess TMDS (2 h at 80 °C under 0.4 torr) left 0.116 g formate **9** in an enough purity to be engaged in the next step. This material was dissolved in 4.7 ml of dry DMSO and KOt-Bu (340 mg, 3.03 mmol, ~15 equiv), CsF (250 mg, 1.65 mmol, ~8 equiv) and 140  $\mu$ l of H<sub>2</sub>O (3%) were added at RT. After stirring 9h at 120°C, the reaction was hydrolysed with brine and extracted with Et<sub>2</sub>O in the usual way. Purification of crude material on silica gel (3% MeOH-NH<sub>3</sub>/DCM) yielded 41.0 mg 0.087 mmol of the corresponding protodesilylated alcohol **14** (46% yield over 2 steps). [ $\alpha$ ]<sub>D</sub><sup>20</sup> +14.6 (c 0.48, CHCl<sub>3</sub>); IR (KBr)  $\nu$  3408, 2960, 2928, 2869, 1607, 1459, 1372, 1263 cm<sup>-1</sup>; <sup>1</sup>H NMR (500 MHz, C<sub>6</sub>D<sub>6</sub>)  $\delta$  7.26 (d, *J* = 1.8 Hz, 1H), 7.10 (d, *J* = 1.8 Hz, 1H), 5.06 (q, *J* = 6.8 Hz, 1H), 4.19 (sept, *J* = 6.9 Hz, 1H), 3.91 (ddd, *J* = 4.9, 6.4, 9.2 Hz, 1H), 3.56 (app s, 1H), 3.19 (sept, *J* = 6.9 Hz, 1H), 2.95 (br t, *J* = 7.9 Hz, 1H), 2.89 (ddd, *J* = 3.9, 6.4, 12.2 Hz, 1H), 2.80 (sept, *J* = 6.9 Hz, 1H), 2.48 (ddd, *J* = 1.7, 3.0, 13.1 Hz, 1H), 2.27 (ddd, *J* = 7.9, 9.2, 12.8 Hz, 1H), 2.00 (br s, 1H), 1.65–1.51 (m, 4H), 1.61 (d, *J* = 6.8 Hz, 3H), 1.47–1.40 (m, 2H), 1.38 (d, *J* = 6.7 Hz, 3H), 1.37–1.27 (m, 7H), 1.26–1.21 (m, 6H), 1.19 (d, *J* = 6.7 Hz, 3H), 1.14 (d, *J* = 7.4 Hz, 3H), 1.06 (s, 3H), 0.98 (br d, *J* = 12.6 Hz, 1H). <sup>13</sup>C NMR (125 MHz, CDCl<sub>3</sub>)  $\delta$  148.8 (C), 147.2 (C), 145.8 (C), 133.4 (C), 123.2 (CH), 120.3 (CH), 75.0 (CH), 71.2 (C), 71.0 (CH), 67.2 (CH), 61.2 (CH), 58.0 (CH), 53.7 (CH), 38.0 (CH<sub>2</sub>), 34.6 (CH<sub>2</sub>), 34.0 (CH<sub>2</sub>), 33.9 (CH), 31.2 (CH), 30.9 (CH<sub>2</sub>), 29.1 (CH), 28.0 (CH), 25.7 (CH<sub>3</sub>), 25.0 (CH<sub>3</sub>), 24.9 (CH<sub>3</sub>), 24.6 (CH<sub>3</sub>), 24.5 (CH<sub>3</sub>), 24.0 (CH<sub>3</sub>), 23.9 (CH<sub>3</sub>), 23.7 (CH<sub>3</sub>), 23.2 (CH<sub>3</sub>). HRMS calcd for C<sub>30</sub>H<sub>50</sub>NO<sub>3</sub>: 472.3791. Found: 472.3789 (MH<sup>+</sup>).

**(1*S*,2*aR*,3*S*,5*S*,5*aR*,7*R*,8*aS*)-3,5,7-Trimethyldecahydro-1*H*-pyrrolo[2,1,5-*de*]quinolizine-1,7-diol **17**** : To a solution of alcohol **14** (92.0 mg, 0.195 mmol) in 2.0 ml MeCN were added DMAP (19.0 mg, 0.155 mmol, 0.8 eq.), 2,2'-bipyridyl (19.0 mg, 0.122 mmol, 0.6 eq.) and 2-azaadamantane N-oxyl (10.9 mg, 0.072 mmol, 0.4 eq.) and CuCl (32.2 mg, 0.323 mmol, 1.7 eq.) at room temperature. The mixture was stirred at the room temperature under open air atmosphere for 30 min. The reaction was monitored by TLC, noting the color change of the mixture from brown to green indicating the completion of the reaction. The reaction was quenched with saturated NaHCO<sub>3</sub> and Na<sub>2</sub>S<sub>2</sub>O<sub>3</sub> and the mixture was stirred vigorously at room temperature for 5 min. The mixture was then diluted with pentane and the aqueous layer extracted with pentane (3 times). The combined organic layers were dried over MgSO<sub>4</sub> and evaporated yielding 173.0 mg of (1*S*,2*aR*,5*S*,5*aR*,7*R*,8*aS*)-7-Hydroxy-5,7-dimethyl-1-((*R*)-1-(2,4,6-triisopropylphenyl)ethoxy) decahydro-3*H*-pyrrolo[2,1,5-*de*]quinolizin-3-one **15** in mixture with 2,2'-bipyridyl, used for the next step without any further purification. Data for **15** : IR (KBr)  $\nu$  3408, 2959, 2926, 2867, 1727, 1649, 1561, 1457 cm<sup>-1</sup>; <sup>1</sup>H NMR (400 MHz, CDCl<sub>3</sub>)  $\delta$  7.01 (s, 1H), 6.92 (s, 1H), 5.03 (q,  $J$  = 6.9 Hz, 1H), 3.94 (ddd,  $J$  = 4.3, 6.0, 7.9 Hz, 1H), 3.89 (sept,  $J$  = 6.7 Hz, 1H), 3.74 (dd,  $J$  = 7.0, 9.1 Hz, 1H), 3.16 (sept,  $J$  = 6.9 Hz, 1H), 3.06 (ddd,  $J$  = 4.2, 6.0, 11.3 Hz, 1H), 2.83 (sept,  $J$  = 6.9 Hz, 1H), 2.56 (ddd,  $J$  = 3.5, 7.4, 11.1 Hz, 1H), 2.36–2.22 (m, 3H), 2.06–1.87 (m, 2H), 1.70–1.51 (m, 4H), 1.31–1.13 (m, 21H), 1.02 (d,  $J$  = 6.7 Hz, 3H). HRMS calcd for C<sub>30</sub>H<sub>48</sub>NO<sub>3</sub>: 470.3629. Found: 470.3616 (MH<sup>+</sup>). A solution of 0.6 M NaHMDS in toluene (3.2 ml, 1.92 mmol) was added to a solution of methyltriphenylphosphonium bromide (764.1 mg, 2.14 mmol) in 5.4 ml THF at –78°C. The yellow suspension was stirred for 45 min as the temperature was allowed to warm to 0°C then stirred 15 min at this temperature. The mixture was cooled back to –90°C and the previous crude ketone **15** (173.0 mg) was added as a solution in 7.5 ml THF. The reaction mixture was stirred for 1h at –90°C < T < –80°C and temperature was increased to 0°C over 2h followed by stirring at RT for 1h. Quenching was done with water and the aqueous layer was extracted with pentane (3 times). The combined organic layers were dried with MgSO<sub>4</sub> and the solvent was evaporated under vacuo. Partial purification over silica gel (10% EtOAc/cyclohexane) afforded 600.0 mg of a mixture of alkene **16** and excess of Wittig reagent (~1.0:17.7). Data for **16** : IR (KBr)  $\nu$  3387, 2958, 2925, 2854, 1658, 1607, 1462, 1379 cm<sup>-1</sup>; <sup>1</sup>H NMR (400 MHz, CDCl<sub>3</sub>)  $\delta$  7.01 (d,  $J$  = 2.0 Hz, 1H), 6.91 (d,  $J$  = 2.0 Hz, 1H), 5.06 (q,  $J$  = 6.8 Hz, 1H), 4.71 (q,  $J$  = 1.6 Hz, 1H), 4.69 (q,  $J$  = 1.6 Hz, 1H), 4.02 (ddd,  $J$  = 2.8, 6.9, 8.6 Hz, 1H), 3.92 (sept.,  $J$  = 6.8 Hz, 1H), 3.65 (t,  $J$  = 8.0 Hz, 1H), 3.19 (sept,  $J$  = 6.8 Hz, 1H), 3.16 (ddd,  $J$  = 3.6, 6.9, 12.3

Hz, 1H), 2.83 (sept,  $J = 6.9$  Hz, 1H), 2.67 (ddd,  $J = 3.0, 3.0, 12.7$  Hz, 1H), 2.39 (dd,  $J = 5.6, 14.4$  Hz, 1H), 2.01–1.69 (m, 6H), 1.50 (d,  $J = 6.8$  Hz, 3H), 1.41 (ddd,  $J = 2.3, 3.6, 13.4$  Hz, 1H), 1.30–1.16 (m, 22H), 0.98 (d,  $J = 7.0$  Hz, 3H). HRMS calcd for  $C_{31}H_{50}NO_2$ : 468.3836. Found: 468.3827 (MH<sup>+</sup>). To a solution of the previous mixture in 6.0 ml of *i*-PrOH were added at RT phenyl silane (1.0 ml, 8.1 mmol), *tert*-butylhydroperoxide solution (5.0–6.0M in decane, 0.200 ml, 1.0–1.2 mmol) and Mn(dpm)<sub>3</sub> (0.040 g, 0.066 mmol). The reaction mixture was stirred for 4h then the solvent was evaporated. The crude mixture was directly loaded on silica gel (1% MeOH-NH<sub>3</sub>/DCM) to afford 0.1457 g of partially purified corresponding alkane: <sup>1</sup>H NMR (400 MHz, CDCl<sub>3</sub>) δ 7.00 (d,  $J = 1.9$  Hz, 1H), 6.90 (d,  $J = 1.9$  Hz, 1H), 5.00 (q,  $J = 6.8$  Hz, 1H), 4.01 (ddd,  $J = 2.7, 7.1, 9.6$  Hz, 1H), 3.92 (sept,  $J = 6.9$  Hz, 1H), 3.16 (sept,  $J = 6.8$  Hz, 1H), 3.14 (ddd,  $J = 3.8, 7.1, 12.4$  Hz, 1H), 2.83 (sept,  $J = 6.9$  Hz, 1H), 2.72 (ddd,  $J = 7.0, 9.4, 9.4$  Hz, 1H), 2.68 (ddd,  $J = 1.4, 3.1, 13.0$  Hz, 1H), 1.91–1.81 (m, 2H), 1.76–1.54 (m, 3H), 1.48 (d,  $J = 6.8$  Hz, 3H), 1.47–1.39 (m, 1H), 1.36 (ddd,  $J = 2.3, 3.8, 13.4$  Hz, 1H), 1.34–1.15 (m, 23H), 1.13 (ddd,  $J = 2.3, 3.0, 12.5$  Hz, 1H), 1.09 (d,  $J = 7.1$  Hz, 3H), 0.83 (d,  $J = 6.4$  Hz, 3H). HRMS calcd for  $C_{31}H_{52}NO_2$ : 470.39926. Found: 470.39795 (MH<sup>+</sup>). To a solution of the previous compound in 2.5 ml of DCM at 0 °C was added drop wise 0.320 ml TFA. The reaction mixture was vigorously stirred for 1 h at 0°C, after which it was quenched with 10% NaOH solution and extracted with DCM in the usual manner to give 0.170 g of the crude material which was purified over silica gel (6% MeOH–NH<sub>3</sub>/DCM) furnish 0.020 g of diol **17** (43% yield from **14**). IR (KBr) ν 3402, 2956, 2921, 2850, 1650, 1465, cm<sup>-1</sup>; <sup>1</sup>H NMR (400 MHz, CDCl<sub>3</sub>) δ 4.33 (ddd,  $J = 1.9, 5.1, 7.1$  Hz, 1H), 2.96 (ddd,  $J = 3.3, 5.1, 12.1$  Hz, 1H), 2.84 (ddd,  $J = 6.9, 9.1, 10.4$  Hz, 1H), 2.50 (ddd,  $J = 2.8, 5.5, 12.0$  Hz, 1H), 1.85 (ddd,  $J = 2.0, 6.9, 13.4$  Hz, 1H), 1.72 (ddd,  $J = 7.3, 9.0, 13.4$  Hz, 1H), 1.71–1.51 (m, 4H), 1.48 (ddd,  $J = 1.9, 3.2, 12.4$  Hz, 1H), 1.42 (ddd,  $J = 2.0, 2.8, 13.4$  Hz, 1H), 1.37–1.31 (m, 2H), 1.26 (s, 3H), 1.02 (d,  $J = 7.0$  Hz, 3H), 0.79 (d,  $J = 6.5$  Hz, 3H). HRMS calcd for  $C_{14}H_{26}NO_2$ : 240.1964. Found: 240.1958 (MH<sup>+</sup>).

**(2aR,3S,5S,5aR,8aR)-3,5,7-Trimethyl-2,2a,3,4,5,5a,6,8a-octahydro-1H-pyrrolo[2,1,5-de]quinolizine, alkaloid (-)-205B (1):** To a solution of the diol **17** (5.0 mg, 0.021 mmol, 1.0 equiv) in 250 μl DCM were added DMAP (10.0 mg, 0.082 mmol, 3.9 equiv) and *O*-phenyl chlorothionoformate (7.0 μl, 0.051 mmol, 2.4 equiv). The reaction mixture was stirred for 5h at RT and then quenched with 10% NaOH and diluted with DCM. The aqueous layer was then extracted with DCM (3 times) and the combined organic phases were dried over MgSO<sub>4</sub> and concentrated under reduced pressure. The residue was purified over silica gel (0–0.5%

MeOH-NH<sub>3</sub>/DCM) to afford 6.5 mg (83% yield) of O-((1*S*,2*aR*,3*S*,5*S*,5*aR*,7*R*,8*aS*)-7-Hydroxy-3,5,7-trimethyldecahydro-1*H*-pyrrolo[2,1,5-*de*]quinolizin-1-yl) O-phenyl carbonothioate. <sup>1</sup>H NMR (400 MHz, CDCl<sub>3</sub>) δ 7.45–7.39 (m, 2H), 7.31–7.27 (m, 1H), 7.12–7.07 (m, 2H), 5.70 (ddd, *J* = 2.6, 6.6, 9.2 Hz, 1H), 3.58 (ddd, *J* = 3.6, 6.6, 12.4 Hz, 1H), 2.78 (ddd, *J* = 6.8, 9.5, 9.5 Hz, 1H), 2.72 (ddd, *J* = 2.2, 2.9, 12.7 Hz, 1H), 2.11–1.94 (m, 3H), 1.83 (t, *J* = 12.6 Hz, 1H), 1.74–1.46 (m, 4H), 1.39–1.21 (m, 2H), 1.28 (s, 3H), 1.13 (d, *J* = 7.2 Hz, 3H), 0.84 (d, *J* = 6.6 Hz, 3H). To a refluxing solution of the previous O-phenyl carbonothioate (17.5 mg, 0.047 mmol, 1.0 equiv) in 2.8 ml of benzene was added dropwise a mixture of AIBN (3.6 mg, 0.022 mmol, 0.5 equiv) and TMS<sub>3</sub>SiH (34.5 μl, 0.11 mmol, 2.3 equiv) in 510 μl benzene over 45 min. The mixture was refluxed for additional 4h30min, then cooled and evaporated. The residue was loaded directly on silica gel for purification (3% MeOH–NH<sub>3</sub>/DCM) to give 10.2 mg of (2*aR*,4*S*,5*aR*,6*S*,8*S*,8*aR*)-4,6,8-trimethyldecahydro-1*H*-pyrrolo[2,1,5-*de*]quinolizin-4-ol, tertiary alcohol **18** (98%). <sup>1</sup>H NMR (400 MHz, CDCl<sub>3</sub>) δ 3.11 (dddd, *J* = 2.2, 4.0, 7.5, 11.8 Hz, 1H), 2.78 (ddd, *J* = 2.2, 3.0, 12.8 Hz, 1H), 2.43 (ddd, *J* = 6.5, 9.6, 9.6 Hz, 1H), 2.09–1.88 (m, 2H), 1.77–1.64 (m, 3H), 1.54–1.26 (m, 7H), 1.26 (s, 3H), 1.14 (d, *J* = 7.2 Hz, 3H), 0.82 (d, *J* = 6.5 Hz, 3H). HRMS calcd for C<sub>14</sub>H<sub>26</sub>NO: 224.2009. Found: 224.2008 (MH<sup>+</sup>). To a solution of the tertiary alcohol **18** (10.4 mg, 0.05 mmol, 1.0 equiv) in 6 ml of benzene was added *p*-TsOH.H<sub>2</sub>O (70 mg, 0.37 mmol, 7.4 equiv) followed by refluxing the reaction mixture for 8 h. The reaction was then cooled down and diluted with DCM and quenched with 10% NaOH. The aqueous layer was extracted 4 times with DCM and the combined organic layers were dried over magnesium sulphate and evaporated in vacuo to obtain the crude product as a 6:1 mixture of isomers. Purification over silica gel (10–50% AcOEt in pentane) afforded the targeted compound **1** (6.0 mg, 63% yield) as a colorless oil. [ $\alpha$ ]<sub>D</sub><sup>20</sup> +2.4 (c 0.33, CHCl<sub>3</sub>); IR (KBr) ν 2955, 2925, 2852, 1658, 1459, 1376 cm<sup>-1</sup>; <sup>1</sup>H NMR (500 MHz, C<sub>6</sub>D<sub>6</sub>) δ 5.17 (br s, 1H), 3.89 (br s, 1H), 2.97 (ddd, *J* = 1.2, 4.7, 11.6 Hz, 1H), 2.15 (ddd, *J* = 5.2, 9.9, 9.9 Hz, 1H), 2.04 (br t, *J* = 14.4 Hz, 1H), 1.99 (dddd, *J* = 1.6, 9.1, 12.1, 12.1 Hz, 1H), 1.80 (dddd, *J* = 1.9, 5.2, 9.1, 11.1 Hz, 1H), 1.59 (s, 3H), 1.60–1.53 (m, 1H), 1.40–1.20 (m, 6H), 1.30 (d, *J* = 7.1 Hz, 3H), 0.81 (d, *J* = 6.5 Hz, 3H). <sup>13</sup>C NMR (125 MHz, C<sub>6</sub>D<sub>6</sub>) δ 129.91 (C), 126.79 (C), 60.97 (CH), 58.95 (CH), 57.02 (CH), 36.35 (CH<sub>2</sub>), 33.34 (CH), 33.11 (CH), 30.13 (CH<sub>2</sub>), 29.17 (CH<sub>2</sub>), 28.72 (CH<sub>2</sub>), 24.15 (CH<sub>3</sub>), 20.76 (CH<sub>3</sub>), 19.41 (CH<sub>3</sub>). HRMS calcd for C<sub>14</sub>H<sub>24</sub>N: 206.19033 Found: 206.19045 (MH<sup>+</sup>).

## Summary of previously published synthesis of alkaloid 205B

Toyooka's synthesis (ref 3a) :

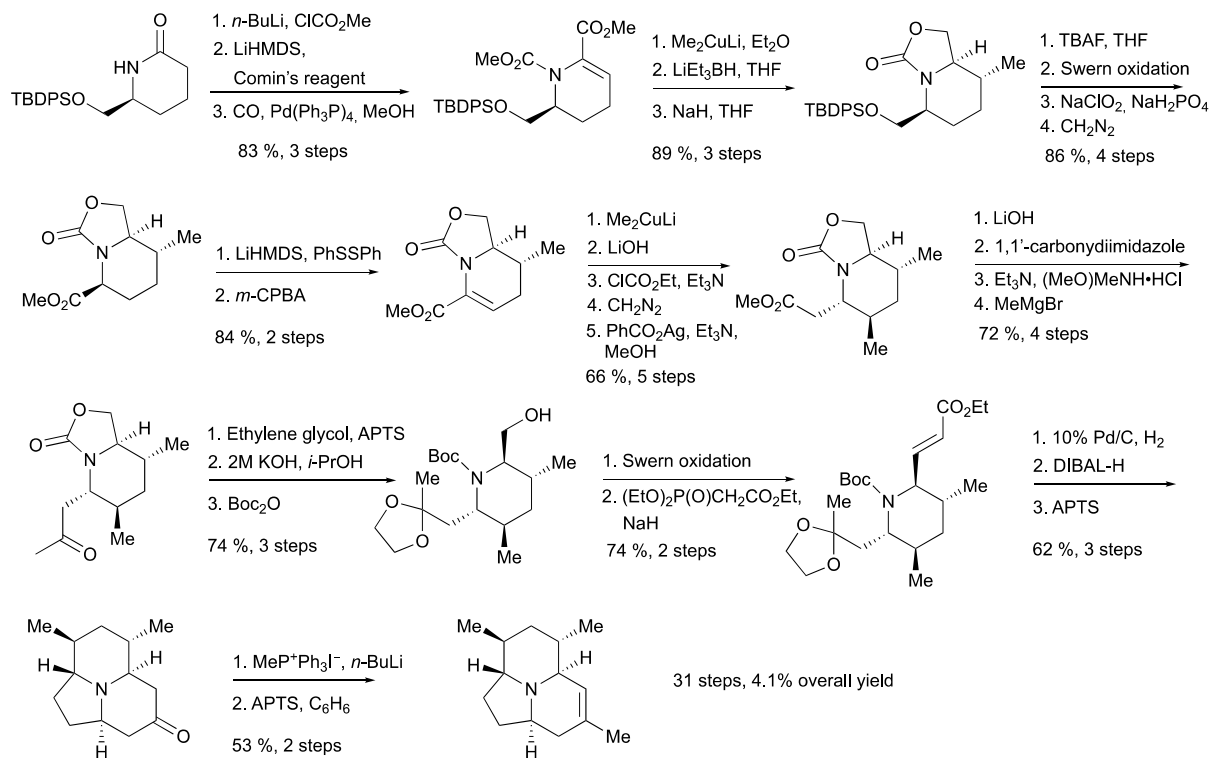

### Smith's synthesis (ref 3b) :

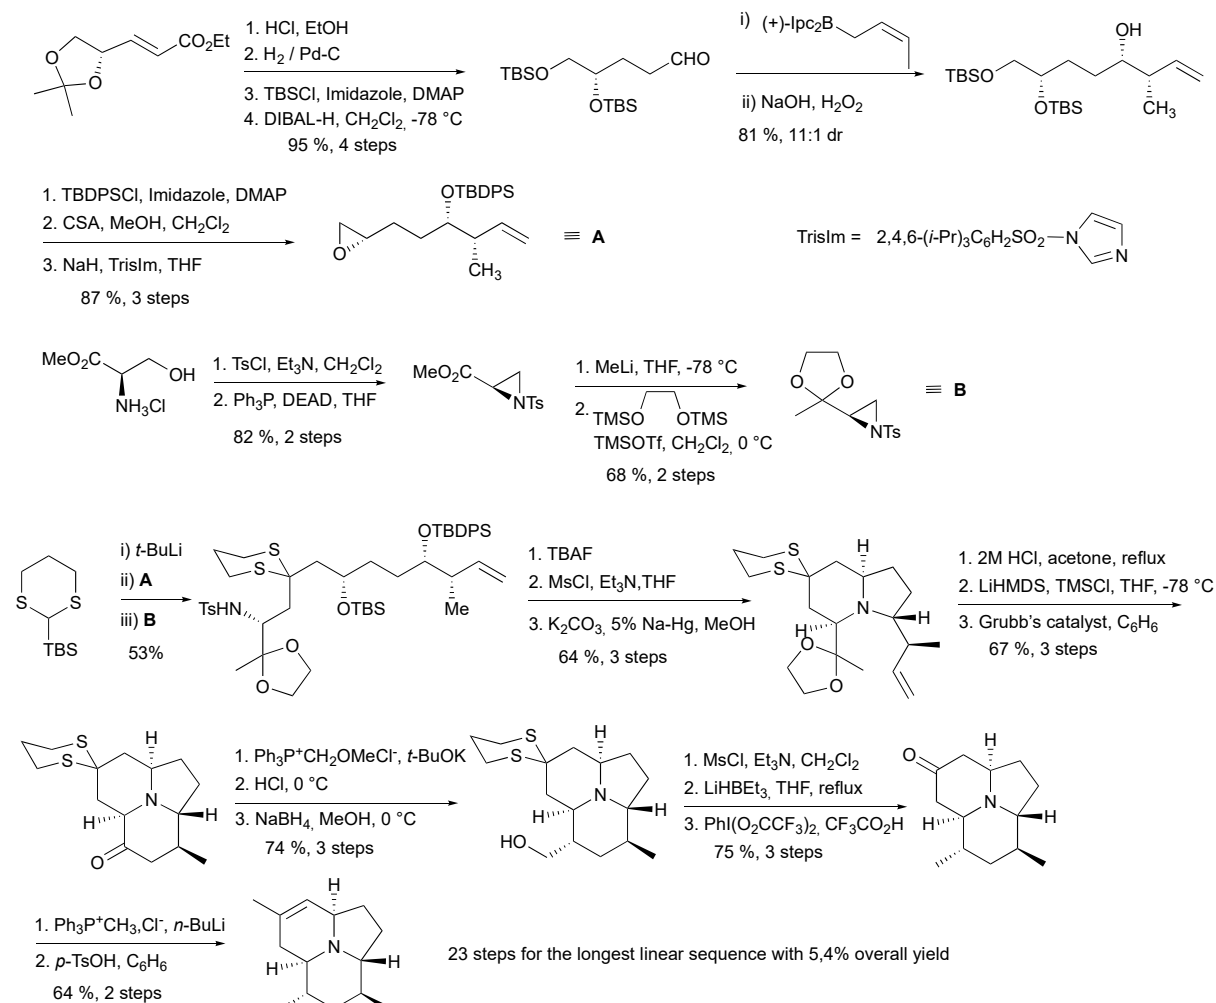

### Comins's synthesis (ref 3d) :

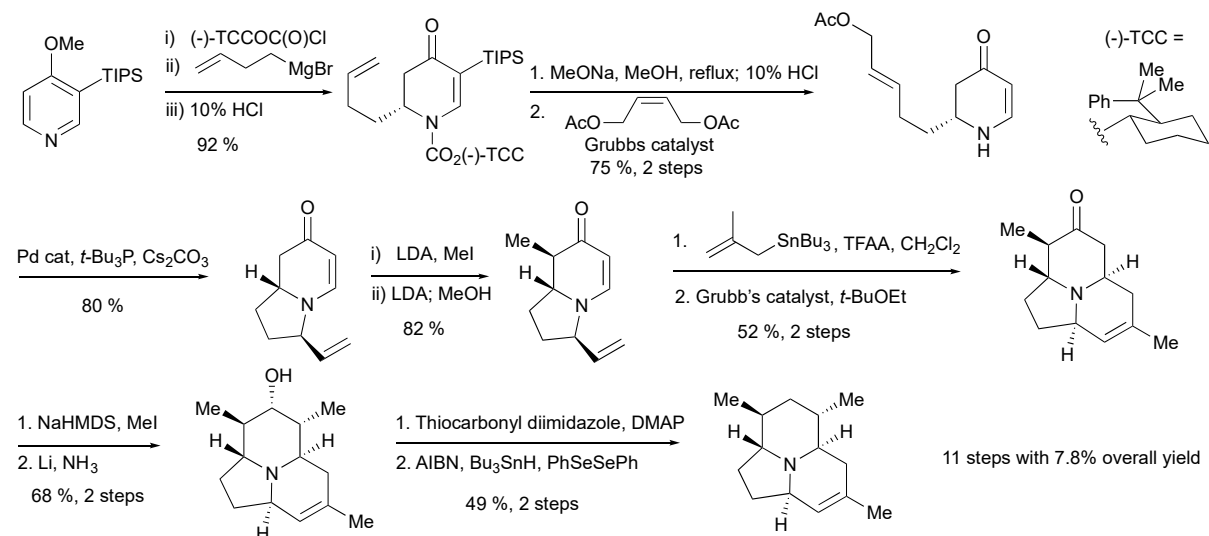

### Micalizio's synthesis (ref 3f) :

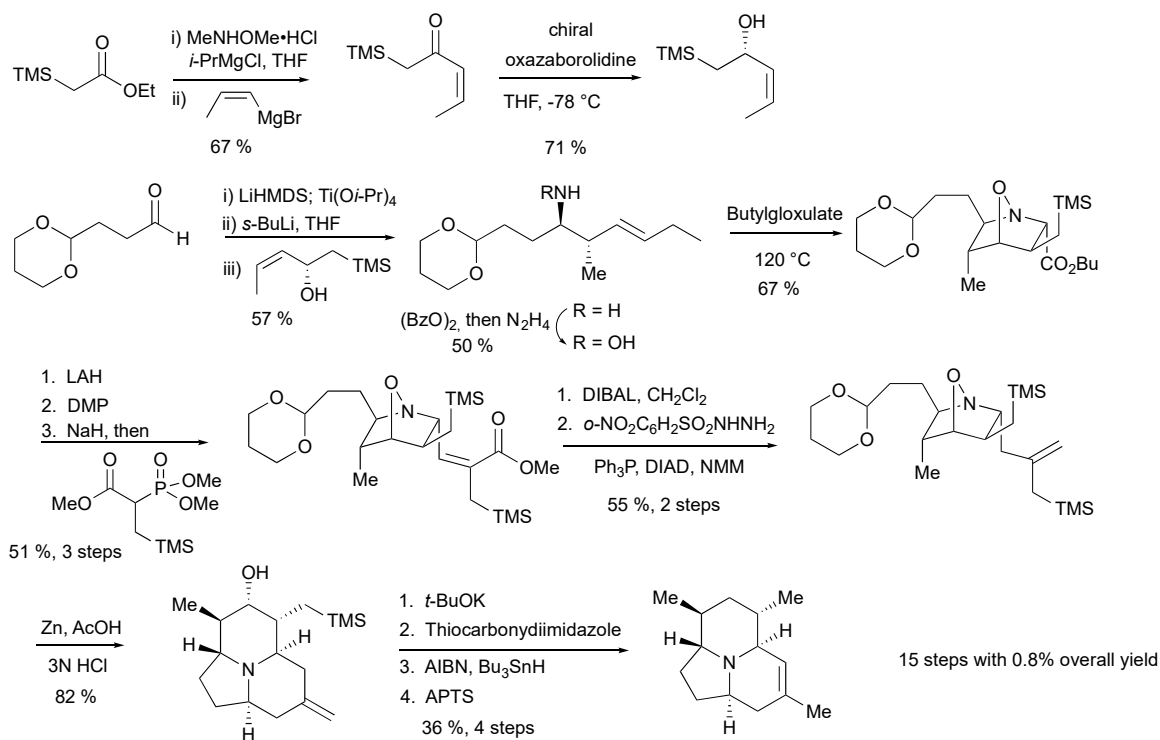

### Cha's synthesis (ref 3g) :

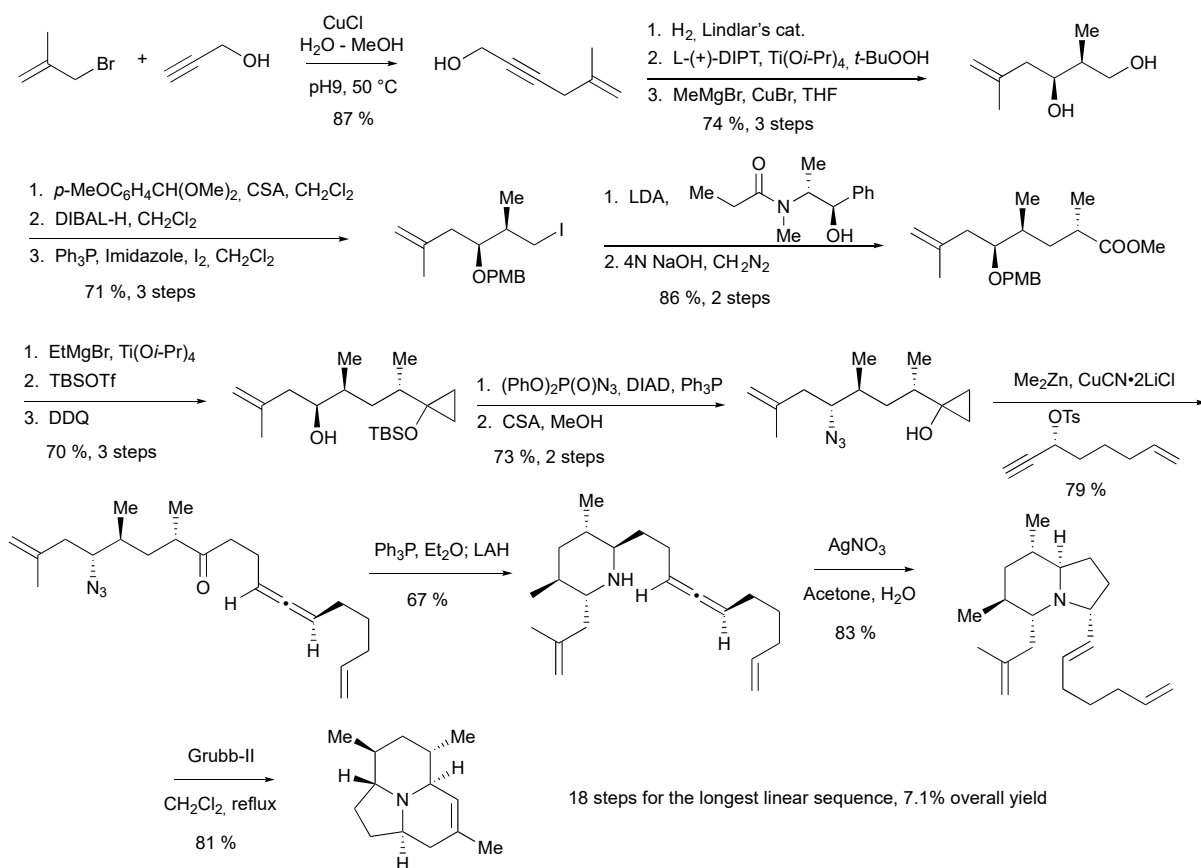



## Comparison Tables of NMR Data of 1

In CDCl<sub>3</sub> :

| <b><sup>1</sup>H NMR</b>       |                                                                                                                                             |                                                                                                                                                        |                                                                                                                                                             |                                                                                                                                                           |
|--------------------------------|---------------------------------------------------------------------------------------------------------------------------------------------|--------------------------------------------------------------------------------------------------------------------------------------------------------|-------------------------------------------------------------------------------------------------------------------------------------------------------------|-----------------------------------------------------------------------------------------------------------------------------------------------------------|
| Ref 1                          | Ref 3a                                                                                                                                      | Ref 3b                                                                                                                                                 | Ref 3d                                                                                                                                                      | Ref 3f                                                                                                                                                    |
| Natural product                | (500 MHz, CDCl <sub>3</sub> )<br>5.20 (br, 1H)<br>3.80 (br, 1H)<br>3.00 (dd, <i>J</i> = 11.2, 4.5 Hz, 1H)<br>2.12- 2.18 (m, 3H)             | (500 MHz, CDCl <sub>3</sub> )<br>5.18 (br s, 1H)<br>3.79 (br s, 1H)<br>2.98 (dd, <i>J</i> = 11.4, 4.6 Hz, 1H)<br>2.17-2.10 (m, 3H)                     | (400 MHz, CDCl <sub>3</sub> )<br>5.18 (bs, 1H)<br>3.79 (bs, 1H)<br>2.98 (dd, <i>J</i> = 4.6, 11.2 Hz, 1H)<br>2.17-2.10 (m, 3H)                              | (400 MHz, CDCl <sub>3</sub> )<br>5.18 (bs, 1H)<br>3.76 (br, 1H)<br>2.98 (dd, <i>J</i> = 4.4, 12.0 Hz, 1H)<br>2.13-2.09 (m, 3H)                            |
| Detailed description not given | 1.92 (m, 1H)<br>1.72 (m, 1H)<br><br>1.64 (s, 3H)<br>1.27-1.52 (m, 4H)<br>1.19 (d, <i>J</i> = 7.3 Hz, 3H)<br>0.86 (d, <i>J</i> = 6.4 Hz, 3H) | 1.93-1.88 (m, 1H)<br>1.79-1.71 (m, 1H)<br><br>1.62 (s, 3H),<br>1.49-1.26 (m, 6H)<br>1.18 (d, <i>J</i> = 7.2 Hz, 3H)<br>0.84 (d, <i>J</i> = 6.4 Hz, 3H) | 1.94 - 1.86 (m, 1H)<br>1.78 - 1.68 (m, 1H)<br><br>1.63 (s, 3H)<br>1.51 - 1.23 (m, 6H)<br>1.17 (d, <i>J</i> = 7.3 Hz, 3H)<br>0.84 (d, <i>J</i> = 6.6 Hz, 3H) | 1.91 - 1.88 (m, 1H)<br>1.74-1.66 (m, 1H)<br><br>1.62 (s, 3H)<br>1.48 - 1.25 (m, 6H)<br>1.17 (d, <i>J</i> = 7.2 Hz, 3H)<br>0.83 (d, <i>J</i> = 6.4 Hz, 3H) |

| <b><sup>13</sup>C NMR</b>     |                               |                               |                               |                               |
|-------------------------------|-------------------------------|-------------------------------|-------------------------------|-------------------------------|
| (100 MHz, CDCl <sub>3</sub> ) | (125 MHz, CDCl <sub>3</sub> ) | (125 MHz, CDCl <sub>3</sub> ) | (100 MHz, CDCl <sub>3</sub> ) | (100 MHz, CDCl <sub>3</sub> ) |
| 129.6                         | 129.52                        | 129.54                        | 129.48                        | 129.54                        |
| 125.6                         | 125.52                        | 125.56                        | 125.33                        | 125.61                        |
| 60.6                          | 60.46                         | 60.53                         | 60.54                         | 60.47                         |
| 58.2                          | 58.04                         | 58.12                         | 57.99                         | 58.09                         |
| 56.6                          | 56.49                         | 56.24                         | 56.41                         | 56.34                         |
| 35.6                          | 35.42                         | 35.51                         | 35.39                         | 35.48                         |
| 32.7                          | 32.55                         | 32.61                         | 32.57                         | 32.58                         |
| 32.5                          | 32.44                         | 32.43                         | 32.31                         | 32.51                         |
| 29.3                          | 29.22                         | 29.23                         | 29.09                         | 29.29                         |
| 28.5                          | 28.38                         | 28.43                         | 28.38                         | 28.41                         |
| 28.5                          | 28.35                         | 28.43                         | 28.34                         | 28.38                         |
| 23.5                          | 23.56                         | 23.52                         | 23.53                         | 23.54                         |
| 20.2                          | 20.19                         | 20.19                         | 20.11                         | 20.21                         |
| 18.8                          | 18.83                         | 18.82                         | 18.84                         | 18.83                         |

In C<sub>6</sub>D<sub>6</sub> :

| 1H NMR                                 |                                        |                                             |                                        |                                                     |
|----------------------------------------|----------------------------------------|---------------------------------------------|----------------------------------------|-----------------------------------------------------|
| Ref 3b                                 | Ref 3d                                 | Ref 3f                                      | Ref 3g                                 | This work                                           |
| (500 MHz, C6D6)                        | (400 MHz, C6D6)                        | (400 MHz, C6D6)                             | (400 MHz, C6D6)                        | (500 MHz, C6D6)                                     |
| 5.19 (br s, 1H)                        | 5.19 (bs, 1H)                          | 5.19 (d, <i>J</i> = 1.2 Hz, 1H)             | 5.19 (br s, 1H)                        | 5.17 (br s, 1H)                                     |
| 3.87 (br s, 1H)                        | 3.87 (bs, 1H)                          | 3.87 (br, 1H)                               | 3.86 (m, 1H)                           | 3.89 (br s, 1H)                                     |
| 2.95 (dd, <i>J</i> = 4.6, 11.5 Hz, 1H) | 2.95 (dd, <i>J</i> = 4.8, 14.2 Hz, 1H) | 2.95 (dd, <i>J</i> = 4.4, 11.6 Hz, 1H)      | 2.95 (dd, <i>J</i> = 11.7, 4.8 Hz, 1H) | 2.97 (ddd, <i>J</i> = 1.2, 4.7, 11.6 Hz, 1H)        |
| 2.15 (dd, <i>J</i> = 5.2, 9.8 Hz, 1H)  | 2.15 (dt, <i>J</i> = 5.1, 9.8 Hz, 1H)  | 2.15 (td, <i>J</i> = 4.8, 9.6 Hz, 1H)       | 2.15 (dd, <i>J</i> = 9.8, 4.8 Hz, 1H)  | 2.15 (ddd, <i>J</i> = 5.2, 9.9, 9.9 Hz, 1H)         |
| 2.06 (app t, <i>J</i> = 14.3 Hz, 1H)   | 2.05 (bt, <i>J</i> = 15.0 Hz, 1H)      | 2.06 (t, <i>J</i> = 14.8 Hz, 1H)            | 2.06 (br t, <i>J</i> = 14.6 Hz, 1H)    | 2.04 (br t, <i>J</i> = 14.4 Hz, 1H)                 |
| 2.02–1.95 (m, 1H)                      | 2.02–1.95 (m, 1H)                      | 2.01–1.95 (td, <i>J</i> = 2.4, 10.0 Hz, 1H) | 2.02–1.95 (m, 1H)                      | 1.99 (dddd, <i>J</i> = 1.6, 9.1, 12.1, 12.1 Hz, 1H) |
| 1.84–1.79 (m, 1H)                      | 1.84–1.78 (m, 1H)                      | 1.82–1.78 (m, 1H)                           |                                        | 1.80 (dddd, <i>J</i> = 1.9, 5.2, 9.1, 11.1 Hz, 1H)  |
| 1.60–1.53 (m, 1H)                      | 1.60–1.52 (m, 1H)                      | 1.60–1.53 (m, 1H)                           | 1.60–1.52 (m, 1H)                      | 1.60–1.53 (m, 1H)                                   |
| 1.59 (s, 3H)                           | 1.59 (s, 3H)                           | 1.59 (s, 3H)                                | 1.59 (s, 3H)                           | 1.59 (s, 3H)                                        |
| 1.39–1.21 (m, 6H)                      | 1.40–1.23 (m, 6H)                      | 1.36–1.23 (m, 6H)                           | 1.39–1.21 (m, 6H)                      | 1.40–1.20 (m, 6H)                                   |
| 1.29 (d, <i>J</i> = 7.1 Hz, 3H)        | 1.29 (d, <i>J</i> = 7.0 Hz, 3H)        | 1.29 (d, <i>J</i> = 7.2 Hz, 3H)             | 1.29 (d, <i>J</i> = 6.8 Hz, 3H)        | 1.30 (d, <i>J</i> = 7.1 Hz, 3H)                     |
| 0.81 (d, <i>J</i> = 6.6 Hz, 3H)        | 0.81 (d, <i>J</i> = 6.6 Hz, 3H)        | 0.81 (d, <i>J</i> = 6.8 Hz, 3H)             | 0.81 (d, <i>J</i> = 6.8 Hz, 3H)        | 0.81 (d, <i>J</i> = 6.5 Hz, 3H)                     |

  

| 13C NMR         |                 |                 |                 |                 |
|-----------------|-----------------|-----------------|-----------------|-----------------|
| (125 MHz, C6D6) | (100 MHz, C6D6) | (100 MHz, C6D6) | (150 MHz, C6D6) | (125 MHz, C6D6) |
| 129.94          | 129.92          | 129.90          | 129.90          | 129.91          |
| 126.85          | 126.81          | 126.85          | 129.81          | 129.79          |
| 60.99           | 60.96           | 60.98           | 60.94           | 60.97           |
| 59.00           | 58.96           | 59.00           | 58.96           | 58.95           |
| 57.02           | 56.97           | 57.01           | 56.97           | 57.02           |
| 36.39           | 36.34           | 36.38           | 36.34           | 36.35           |
| 33.36           | 33.34           | 33.36           | 33.32           | 33.34           |
| 33.16           | 33.14           | 33.16           | 33.13           | 33.11           |
| 30.18           | 30.15           | 30.19           | 30.15           | 30.13           |
| 29.20           | 29.18           | 29.20           | 29.17           | 29.17           |
| 28.74           | 28.70           | 28.73           | 28.70           | 28.72           |
| 24.15           | 24.18           | 24.17           | 24.14           | 24.15           |
| 20.79           | 20.79           | 20.79           | 20.76           | 20.76           |
| 19.43           | 19.43           | 19.42           | 19.40           | 19.41           |

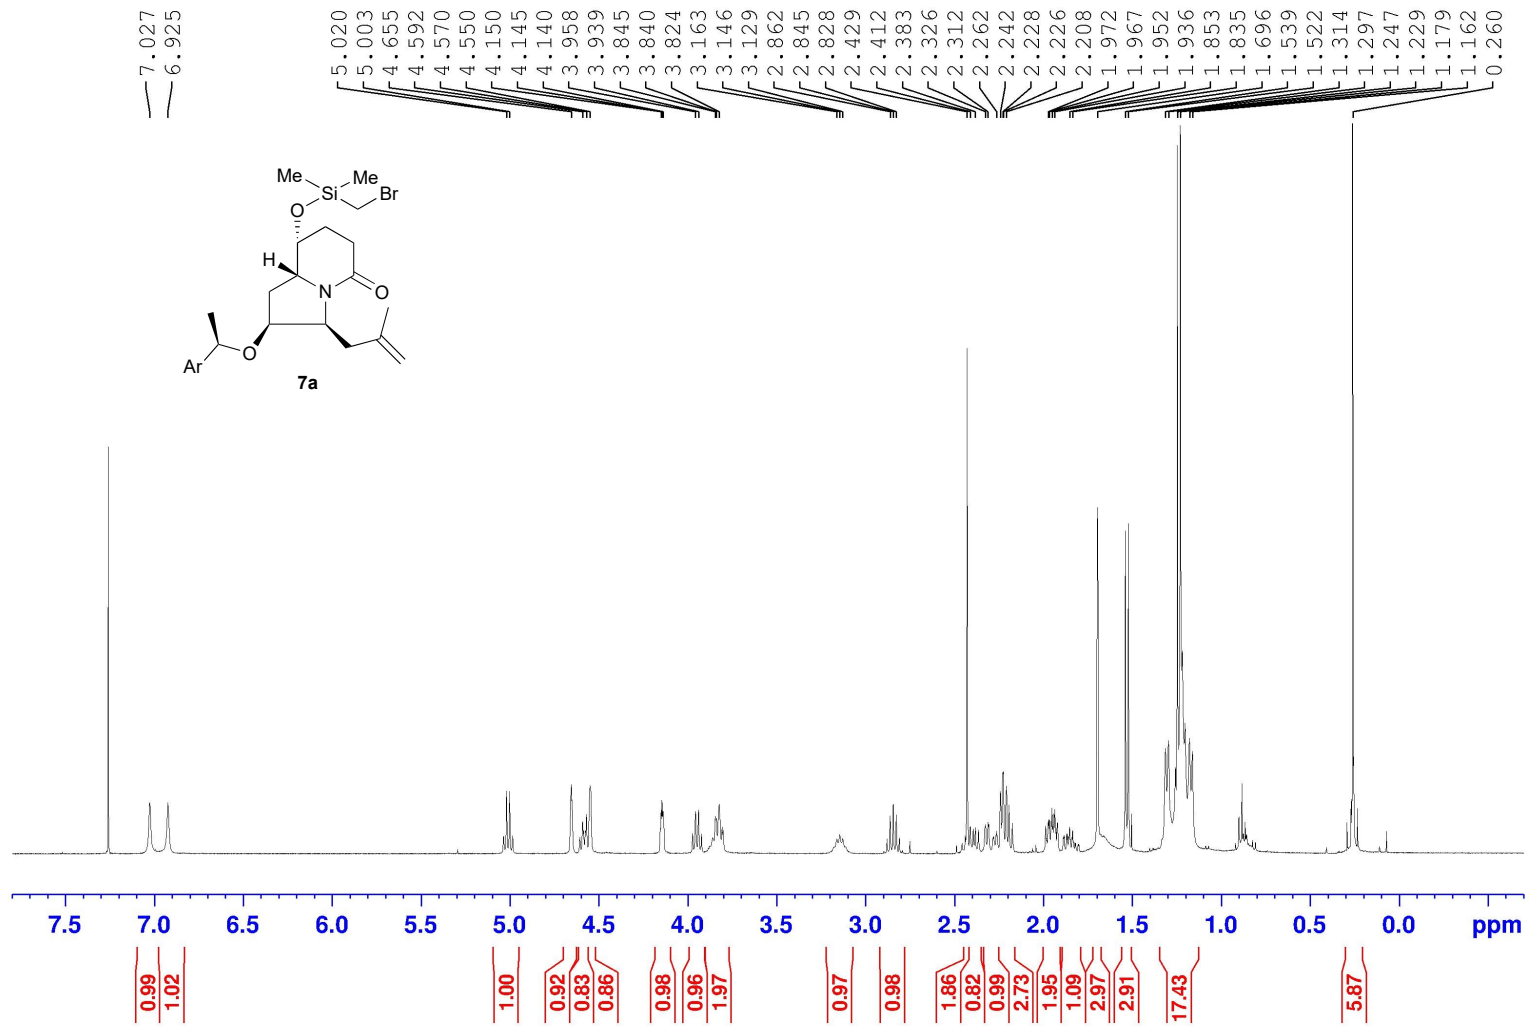

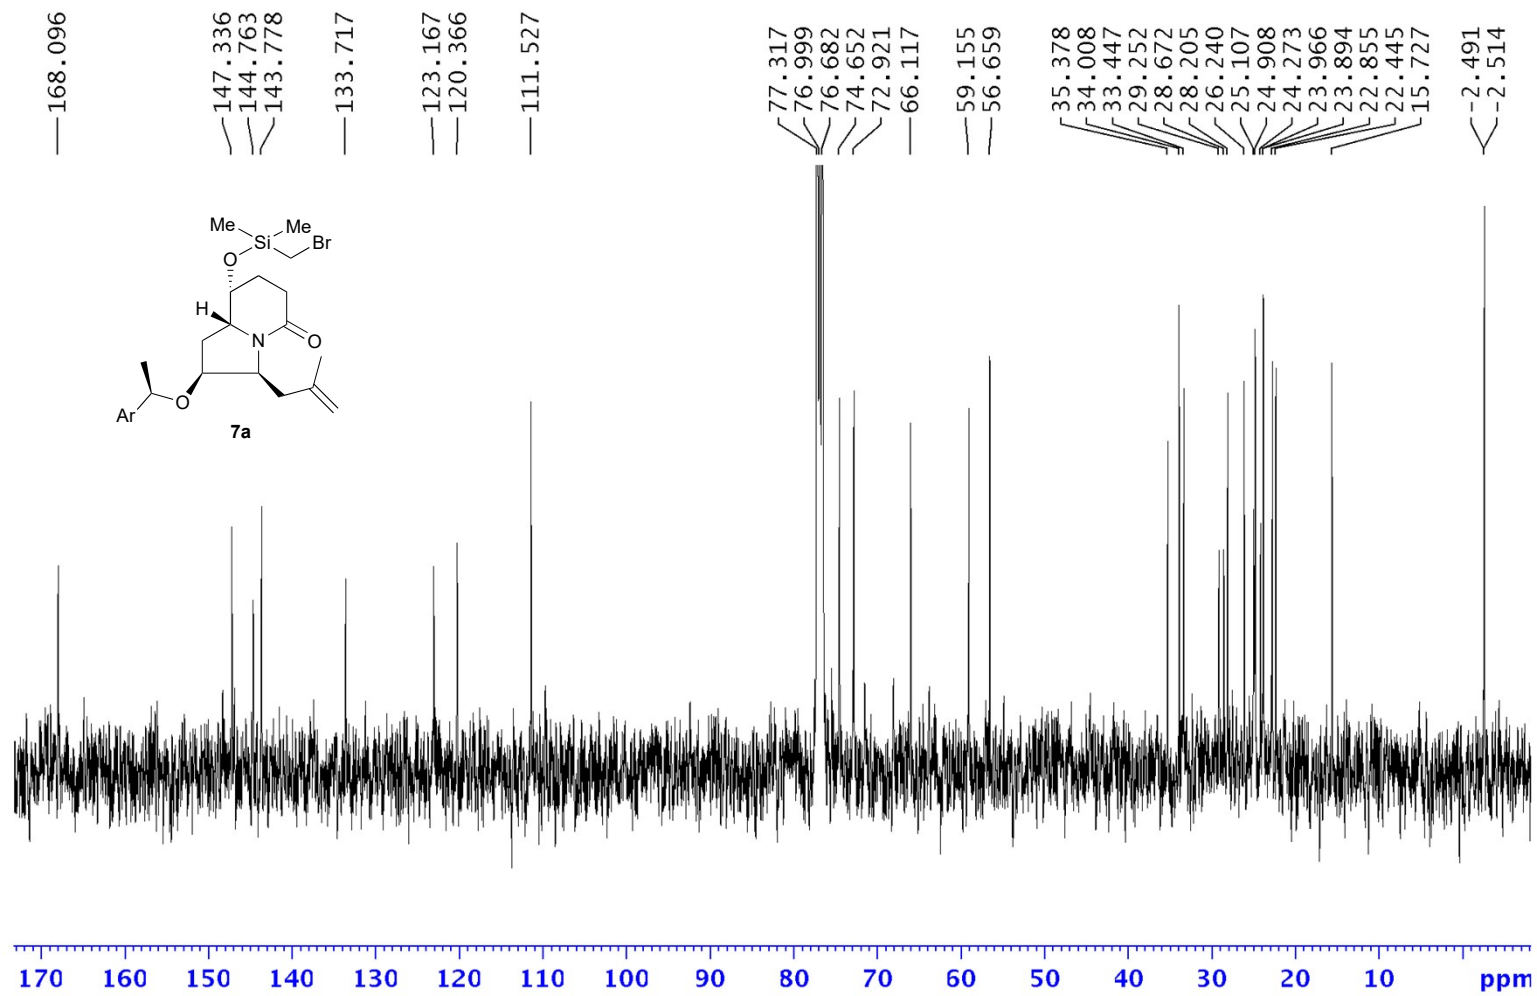

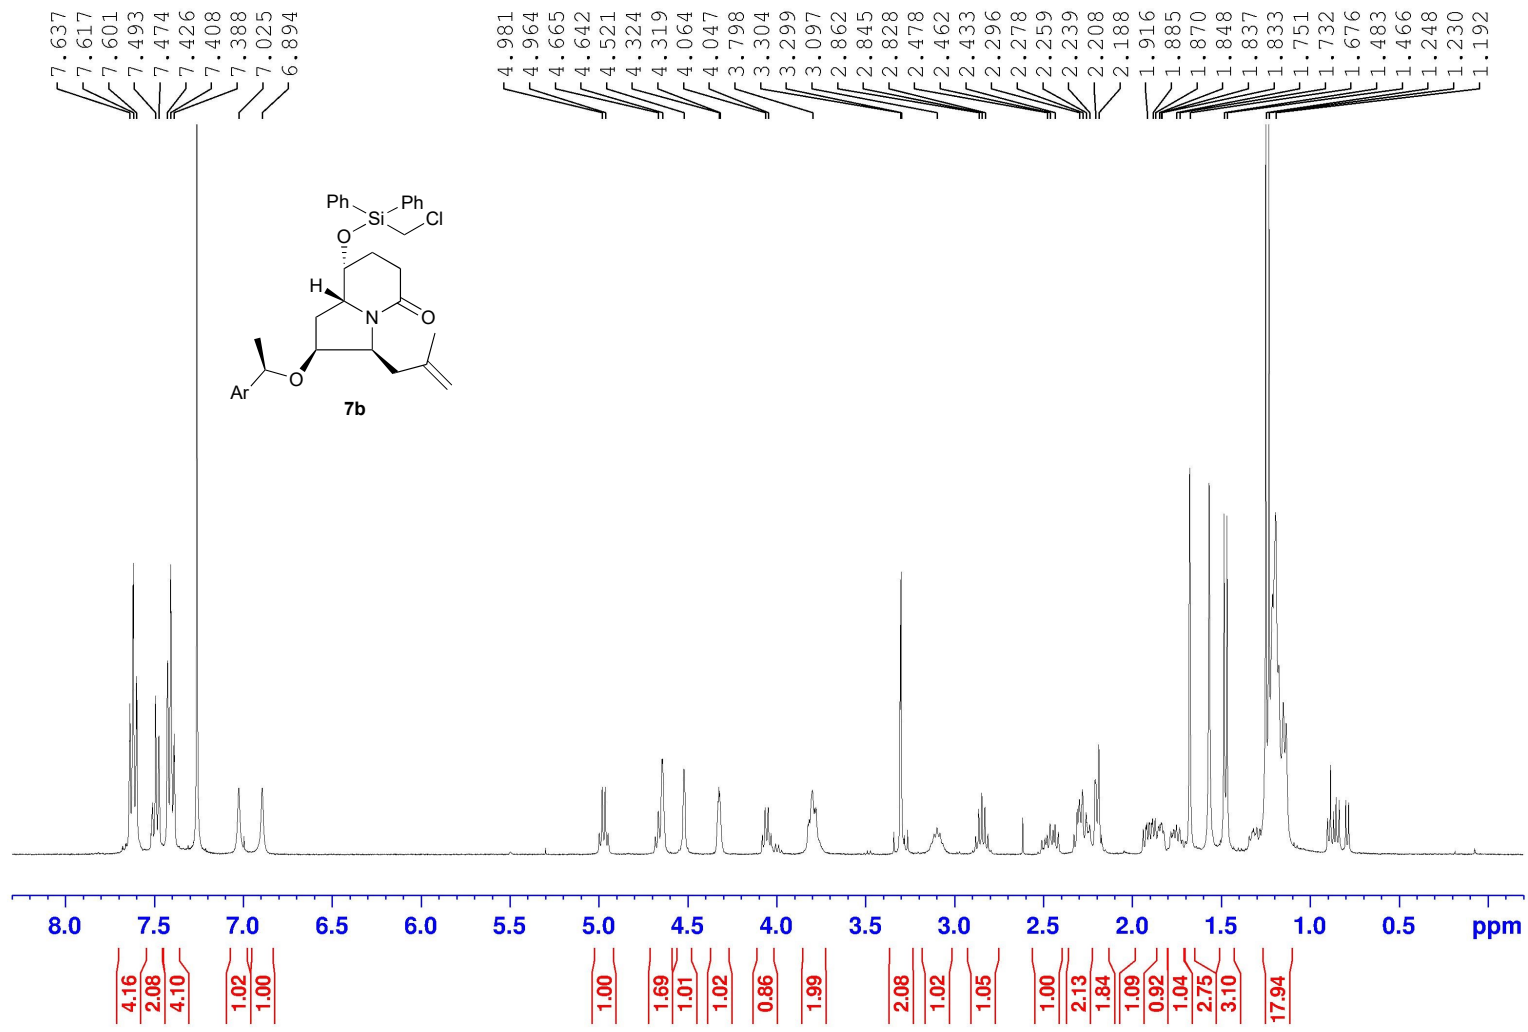

@DEPTQ CDCl3 /opt/topspin medchem 1

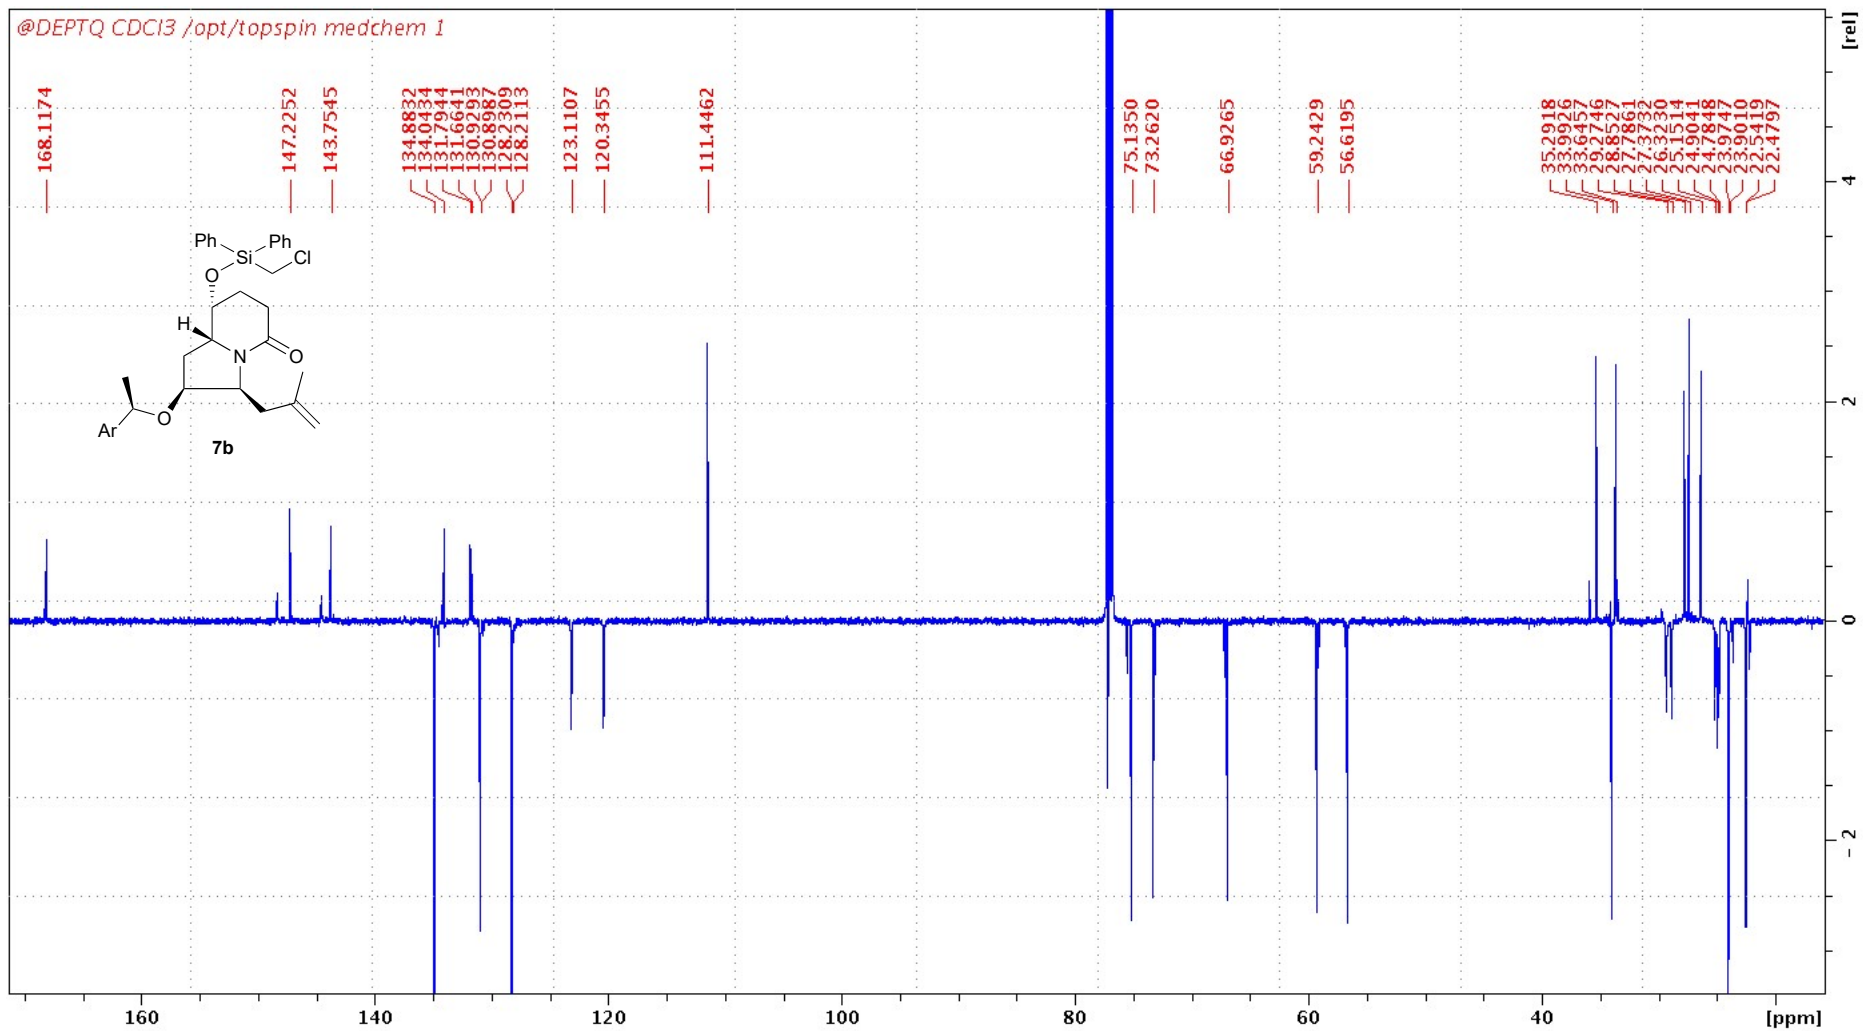

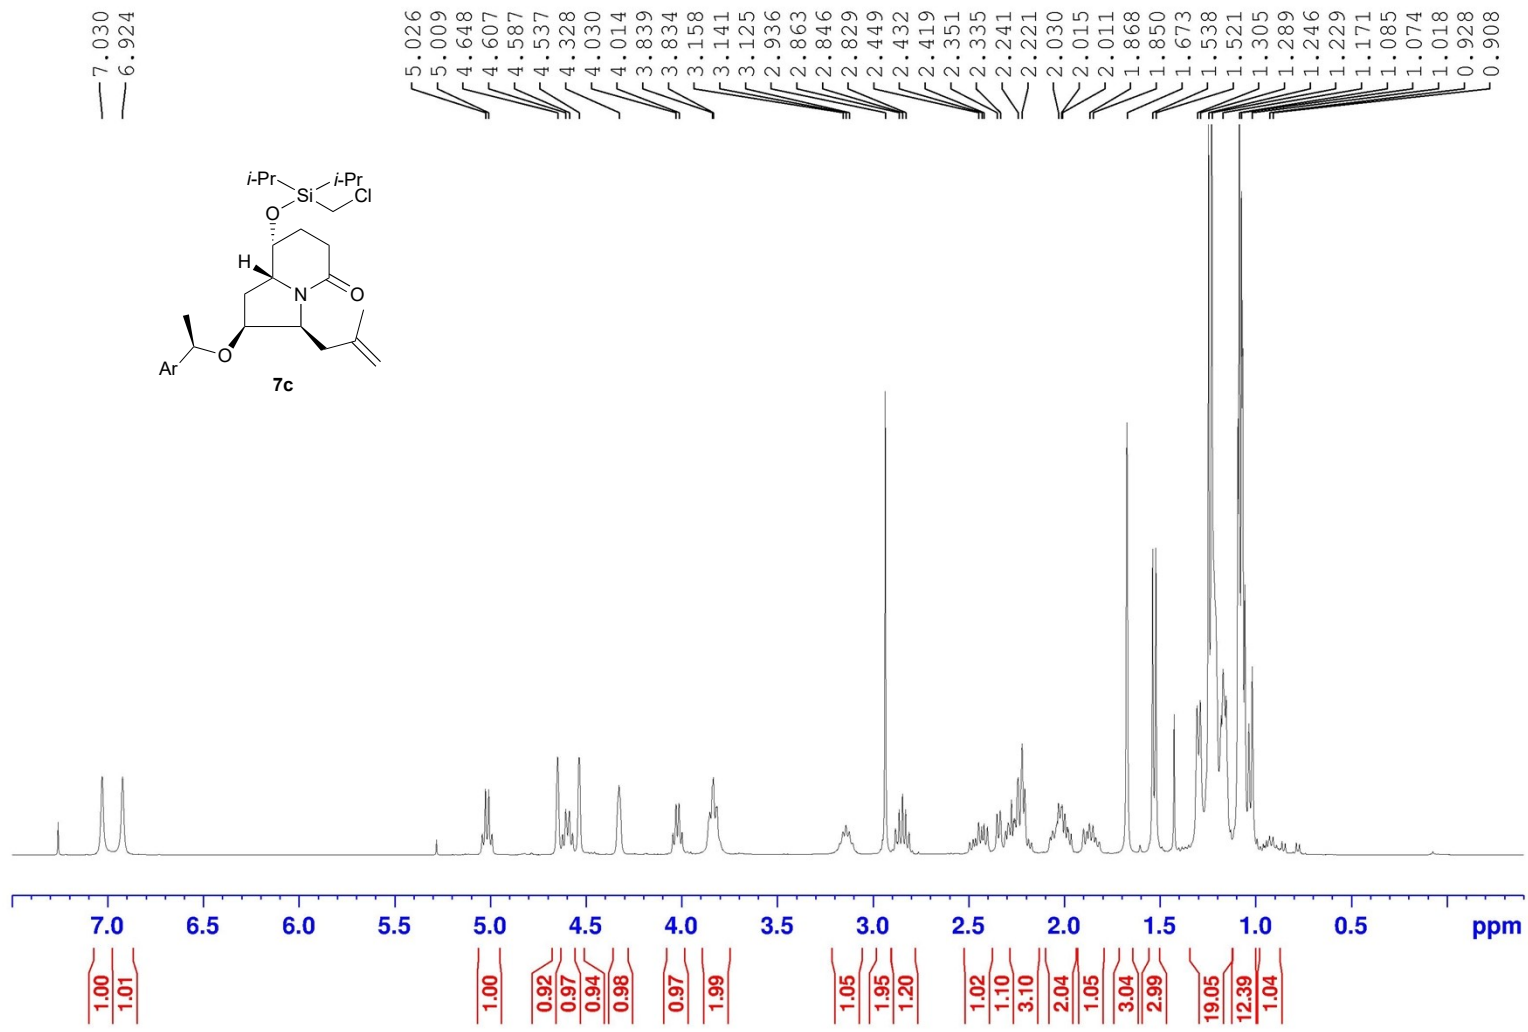

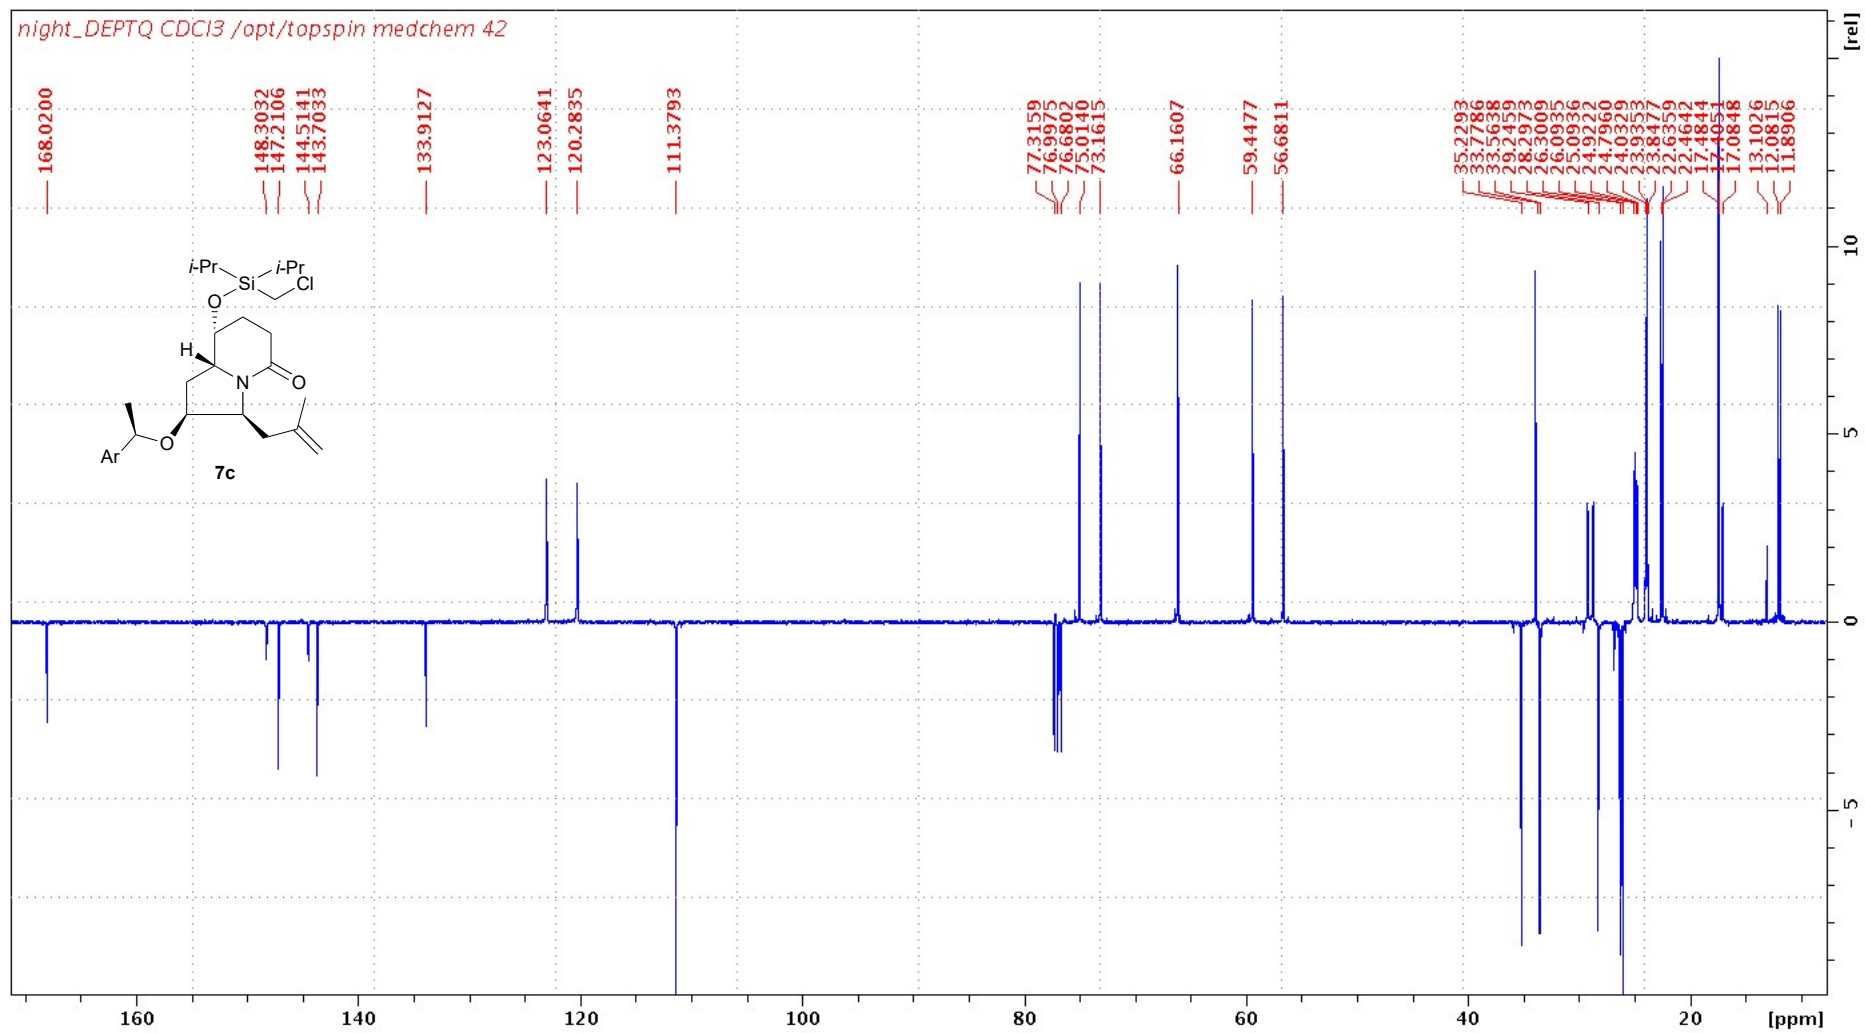



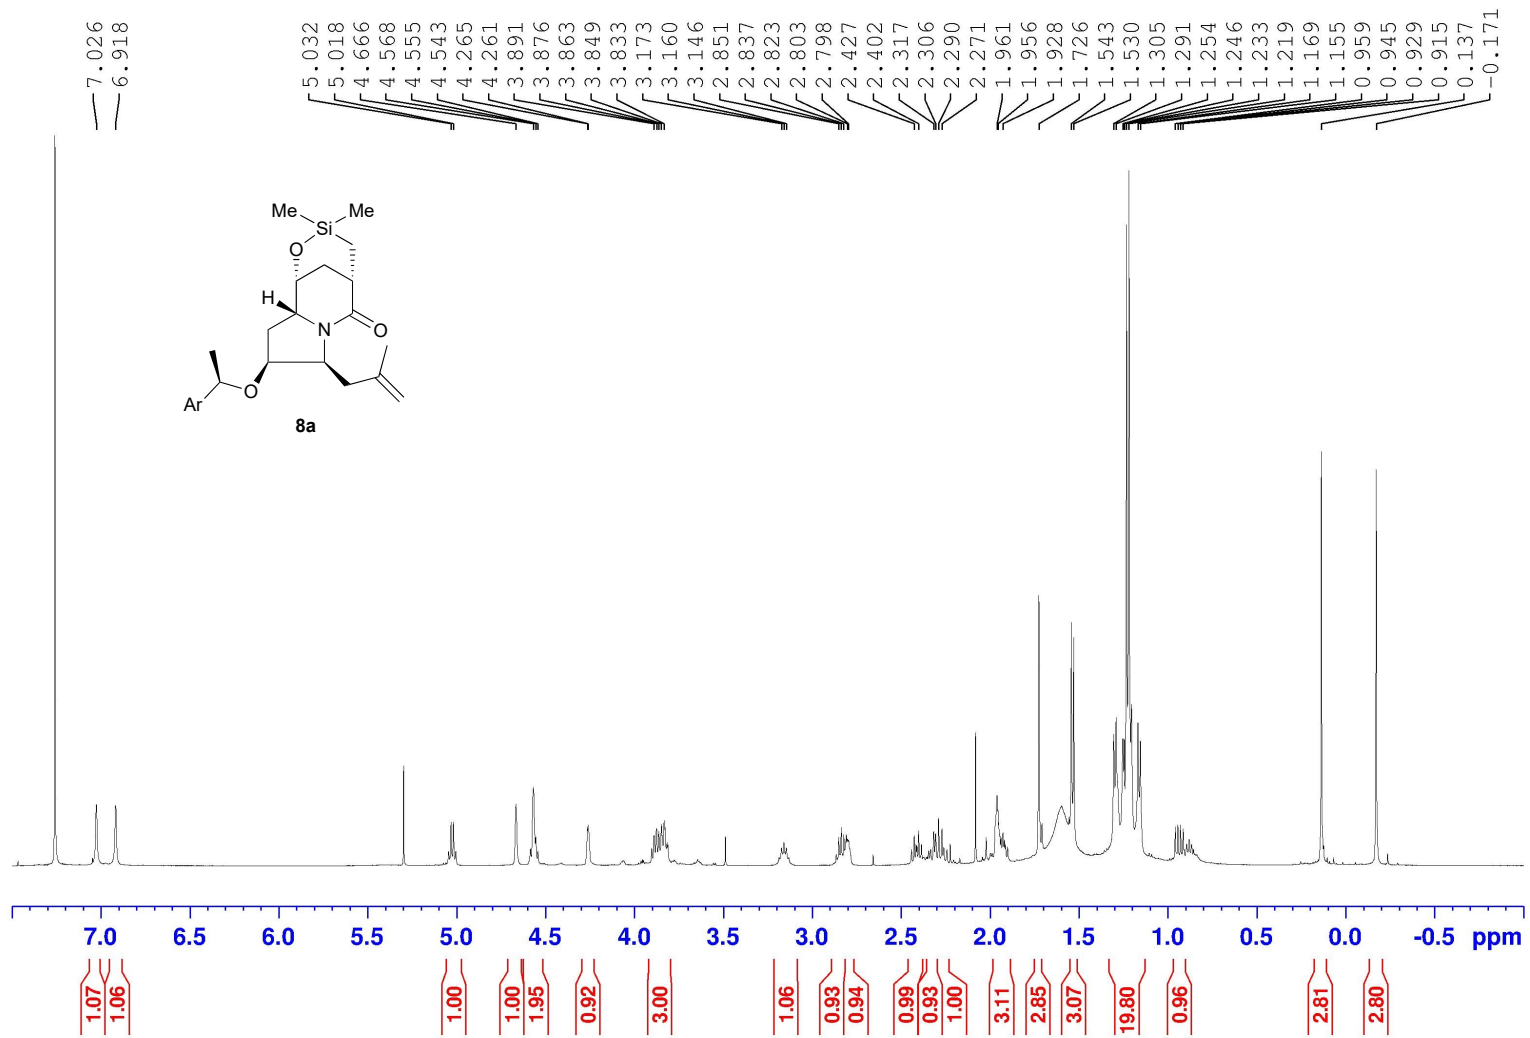

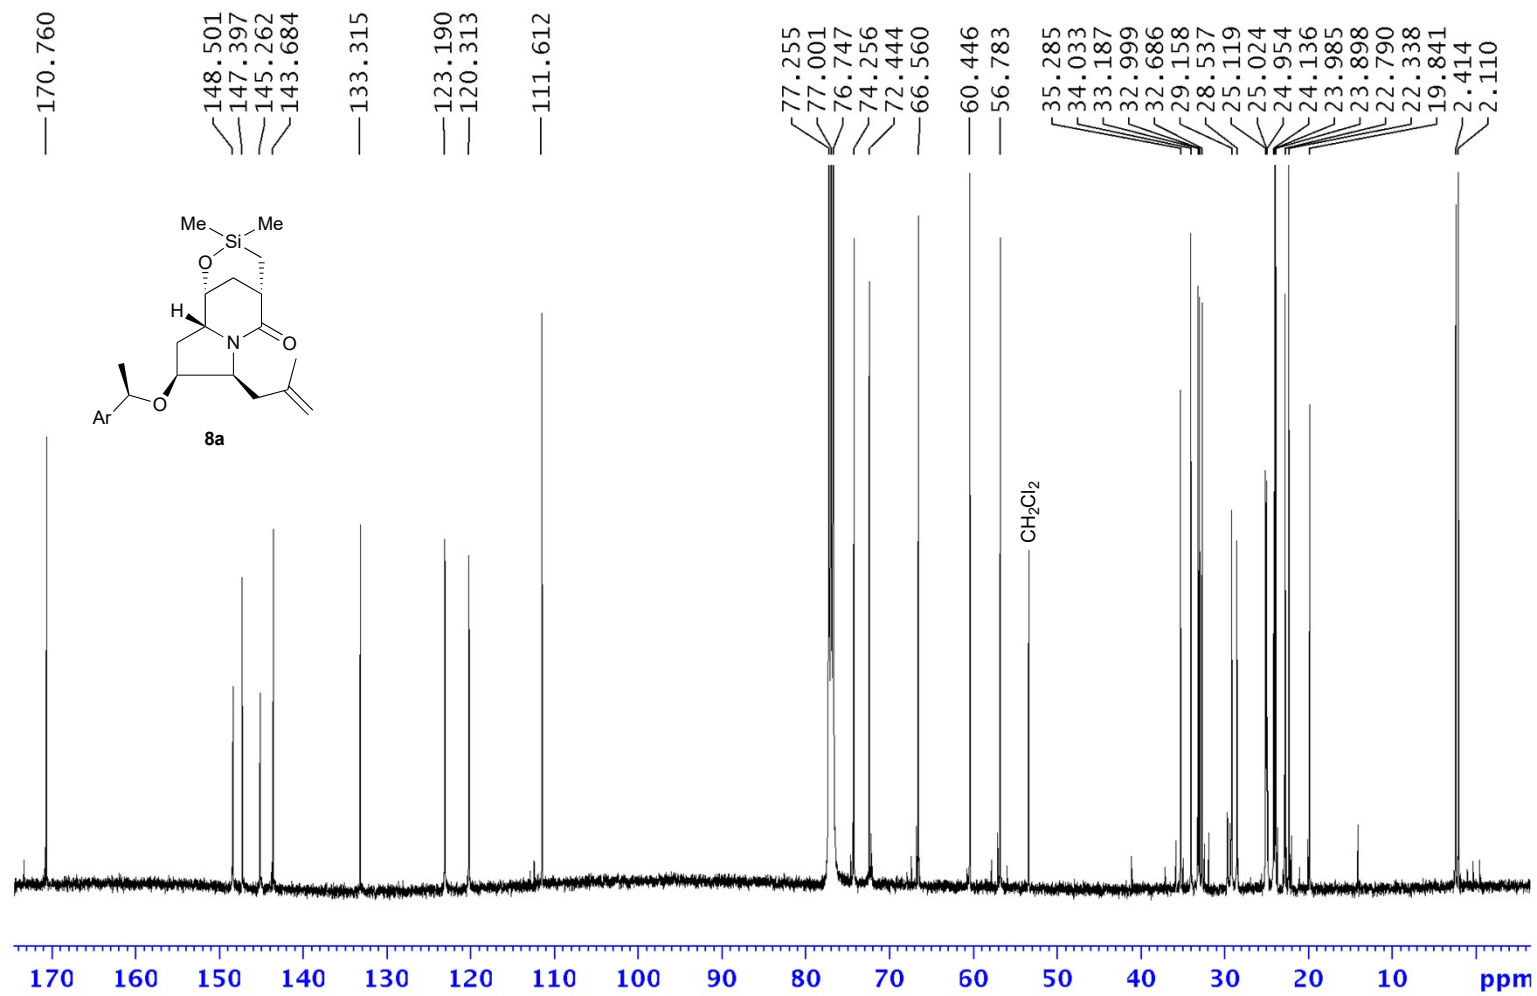

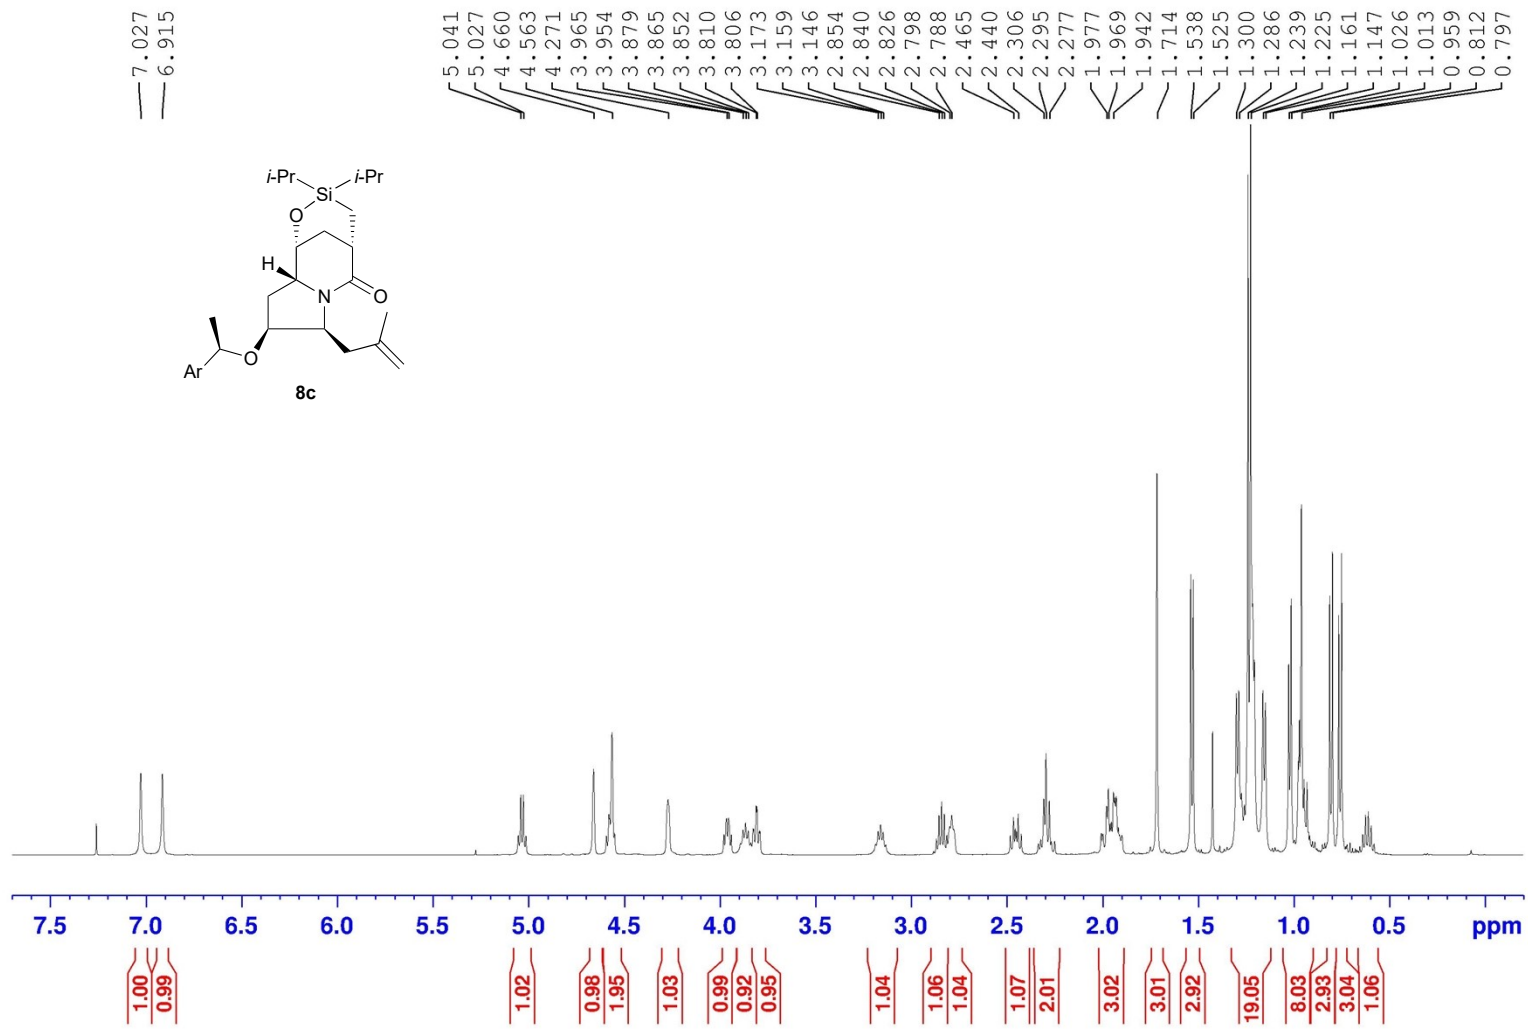

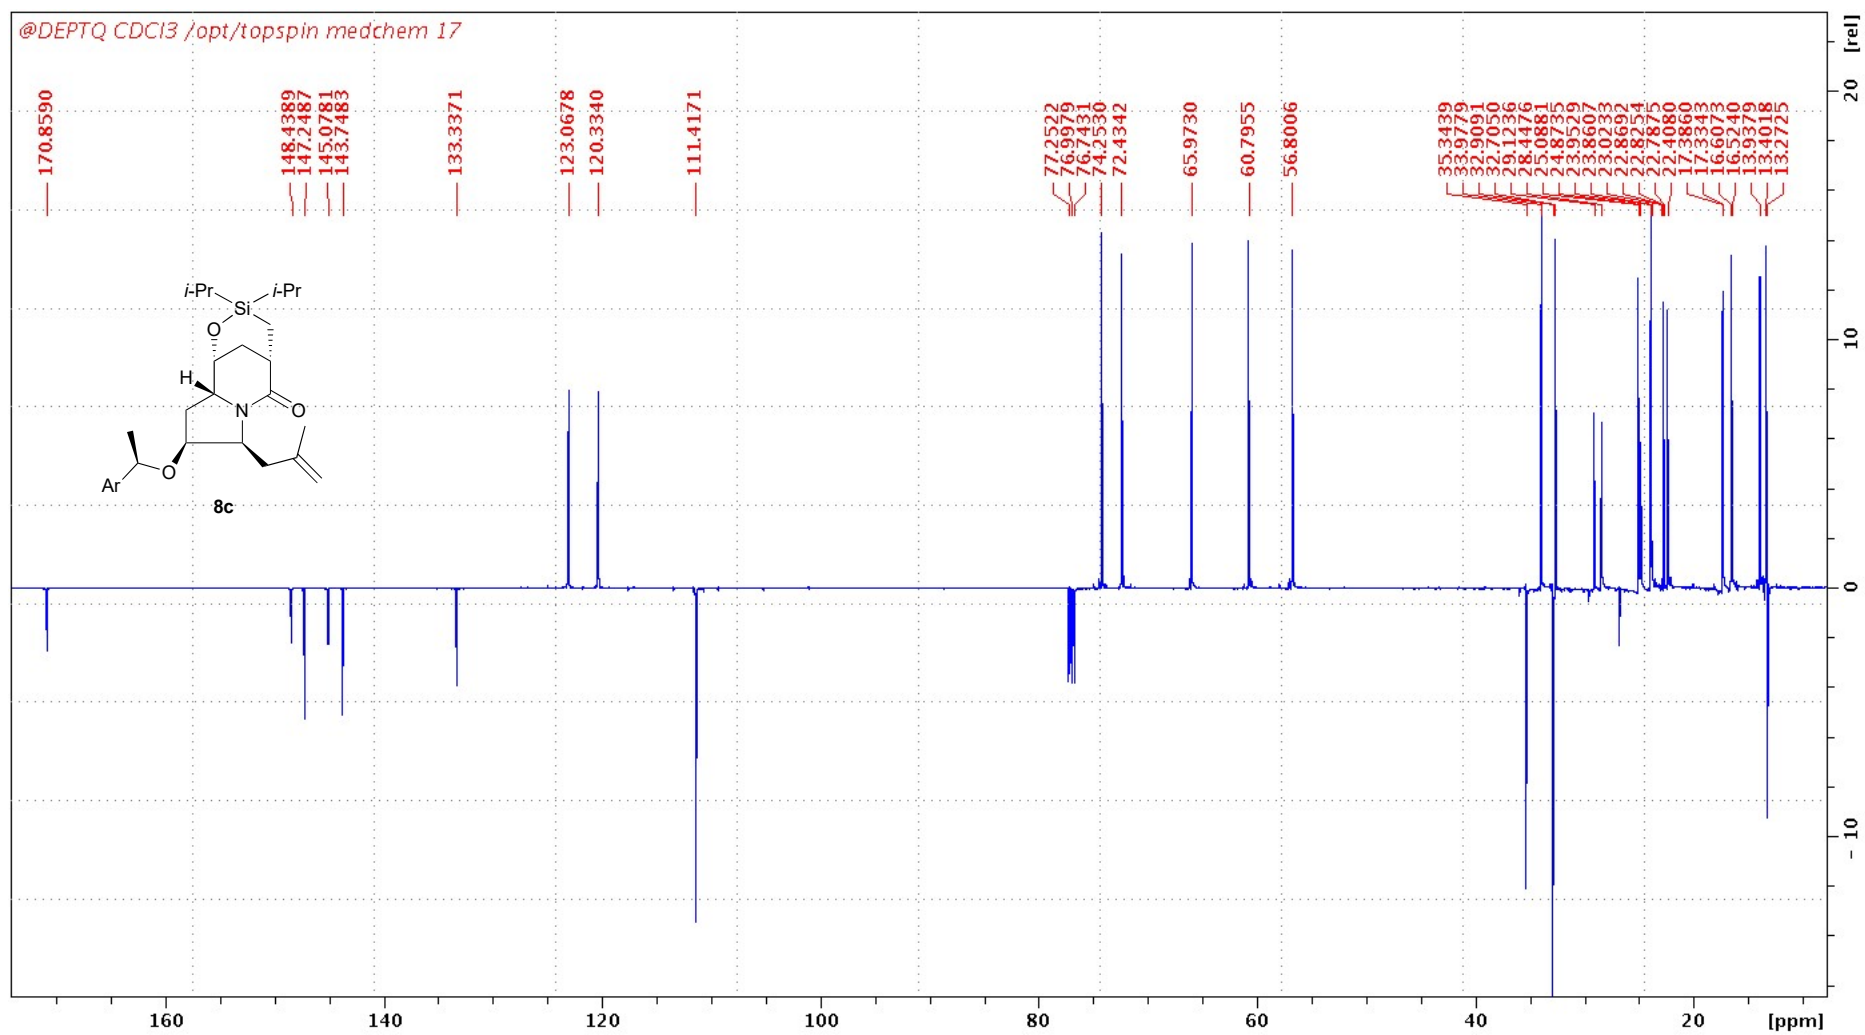

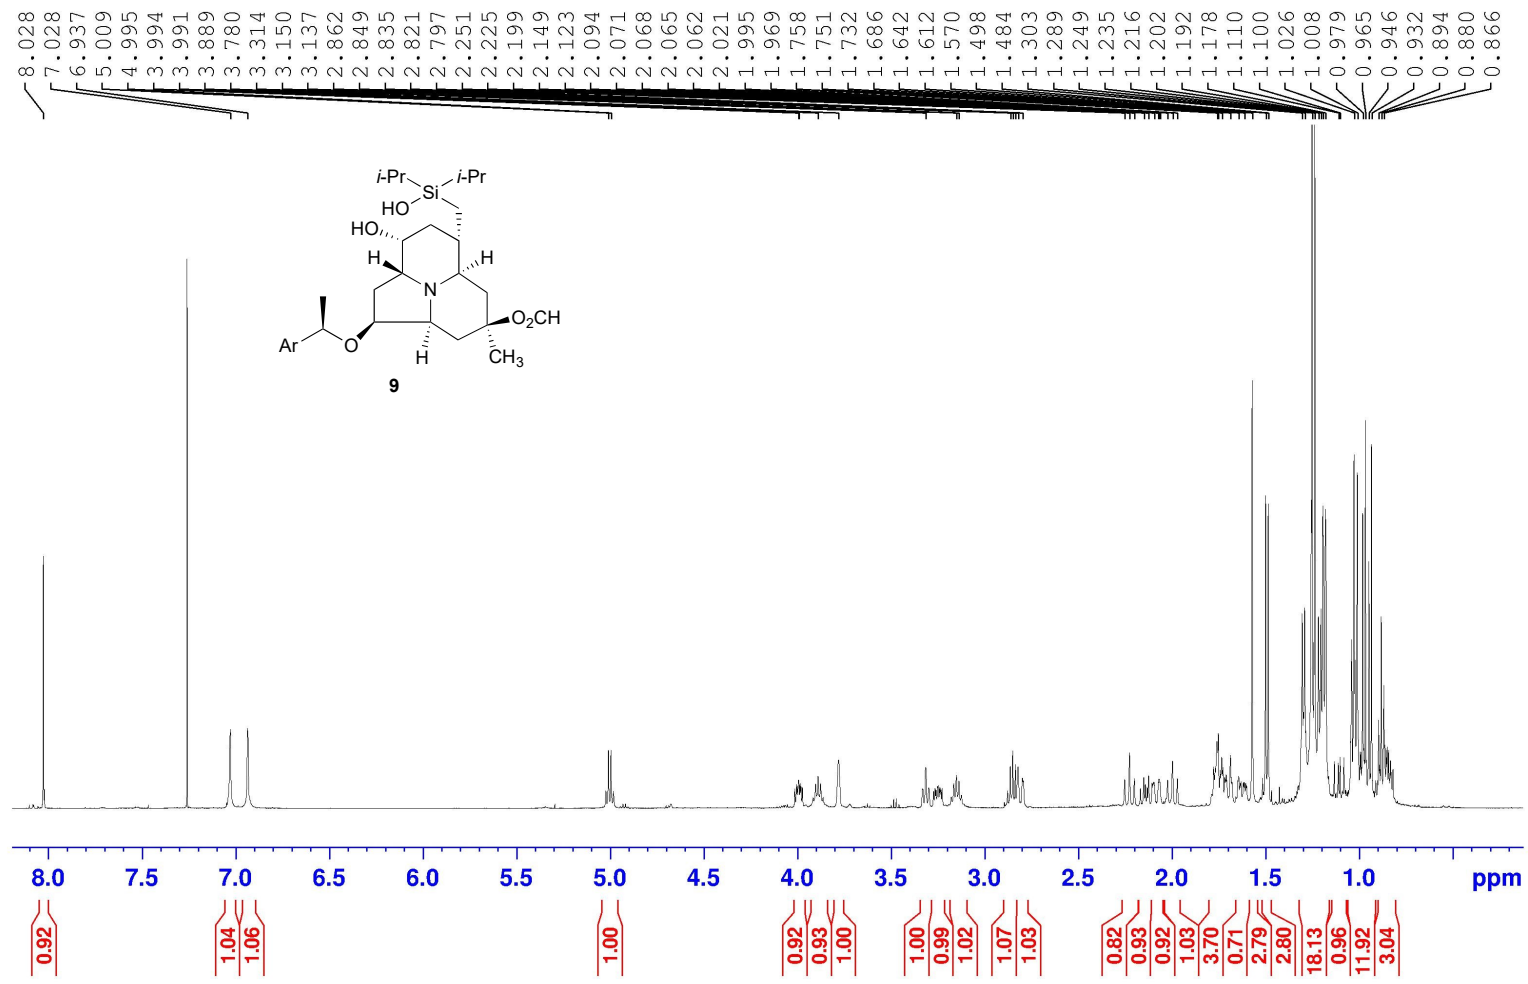

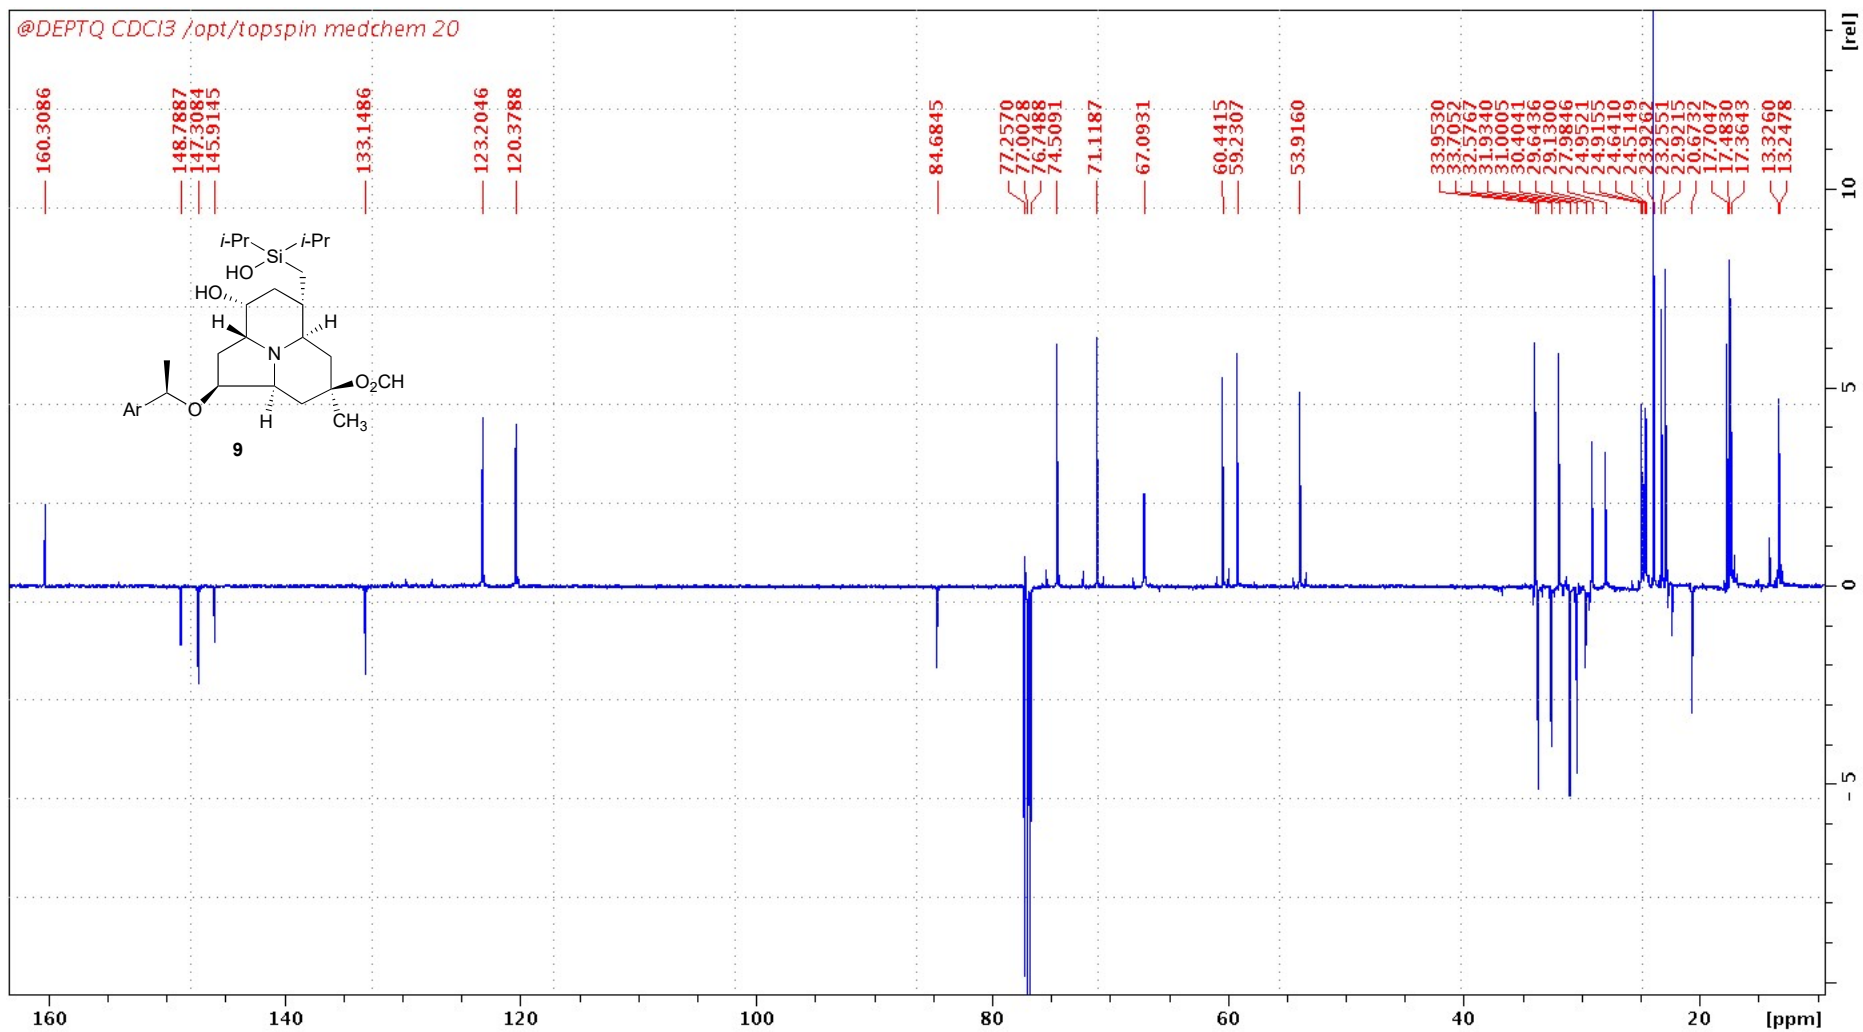

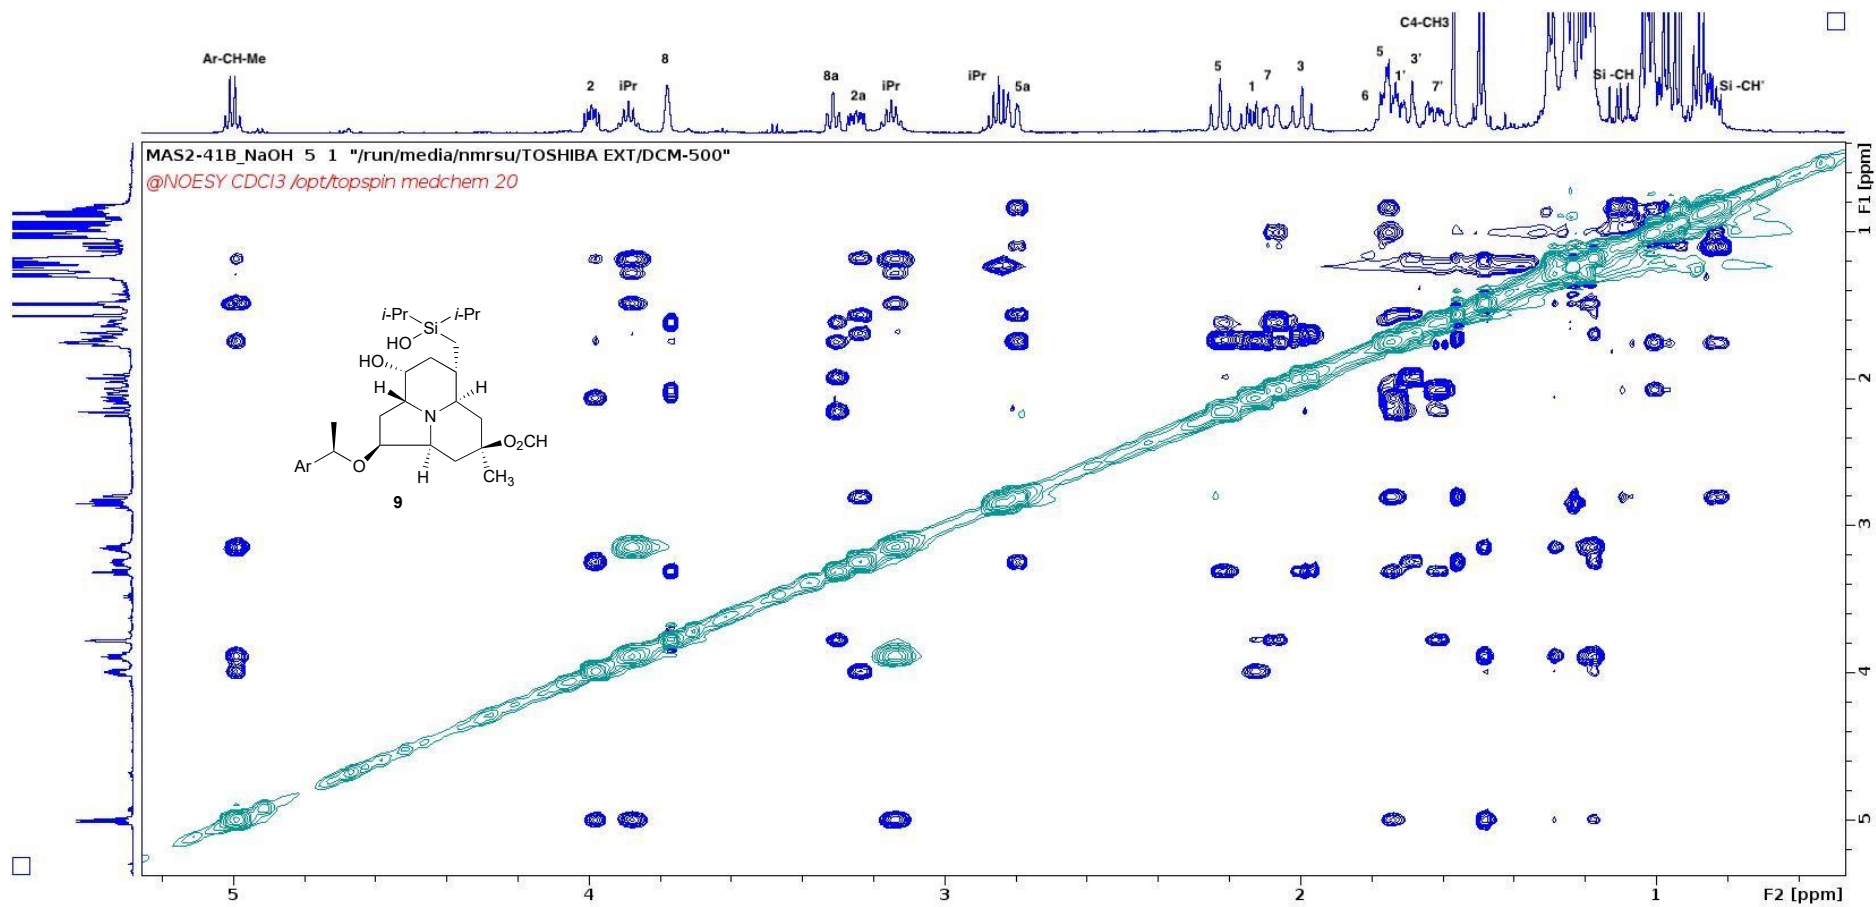

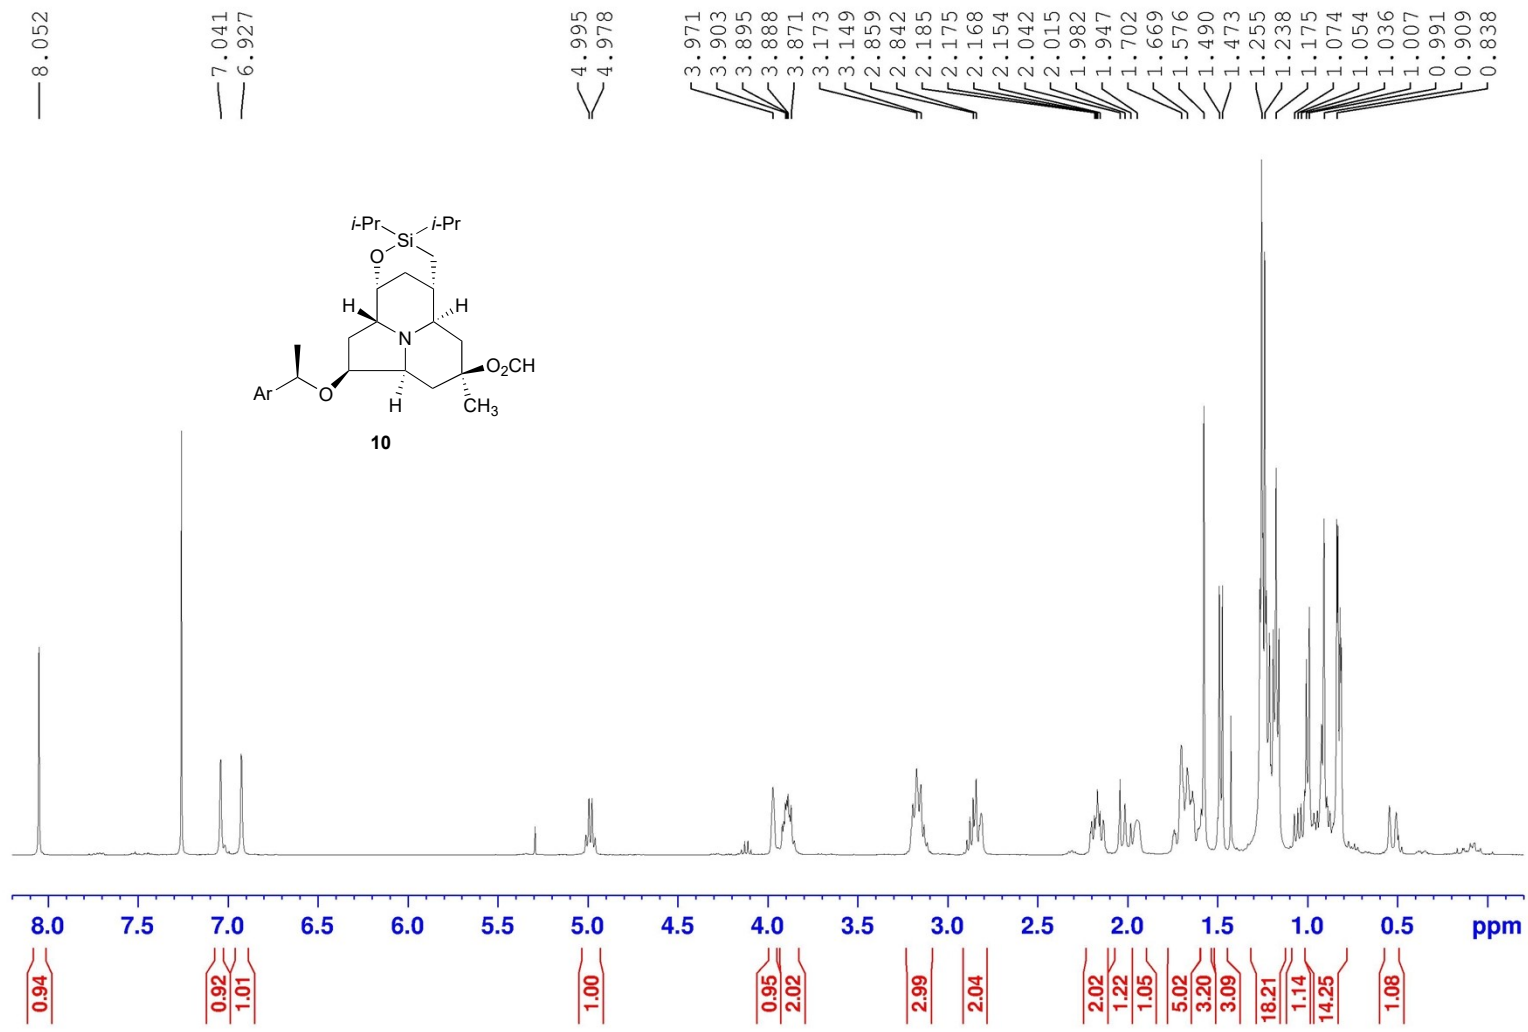



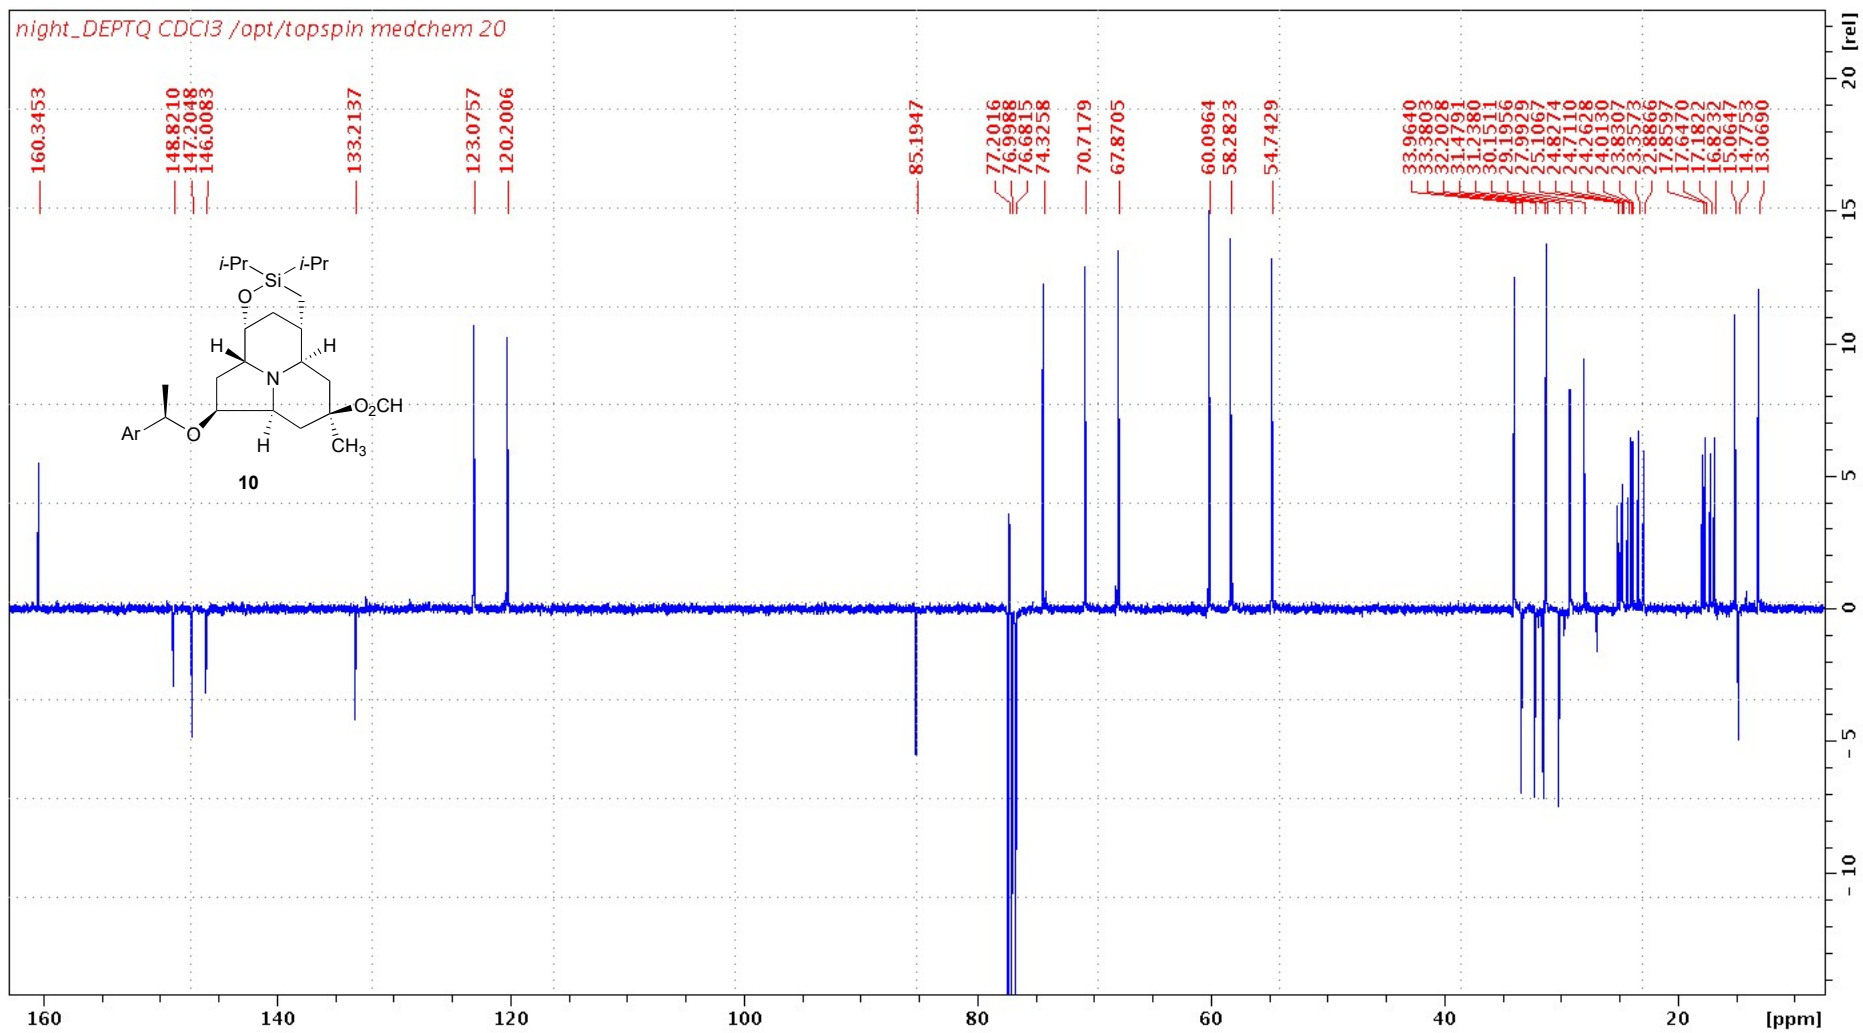

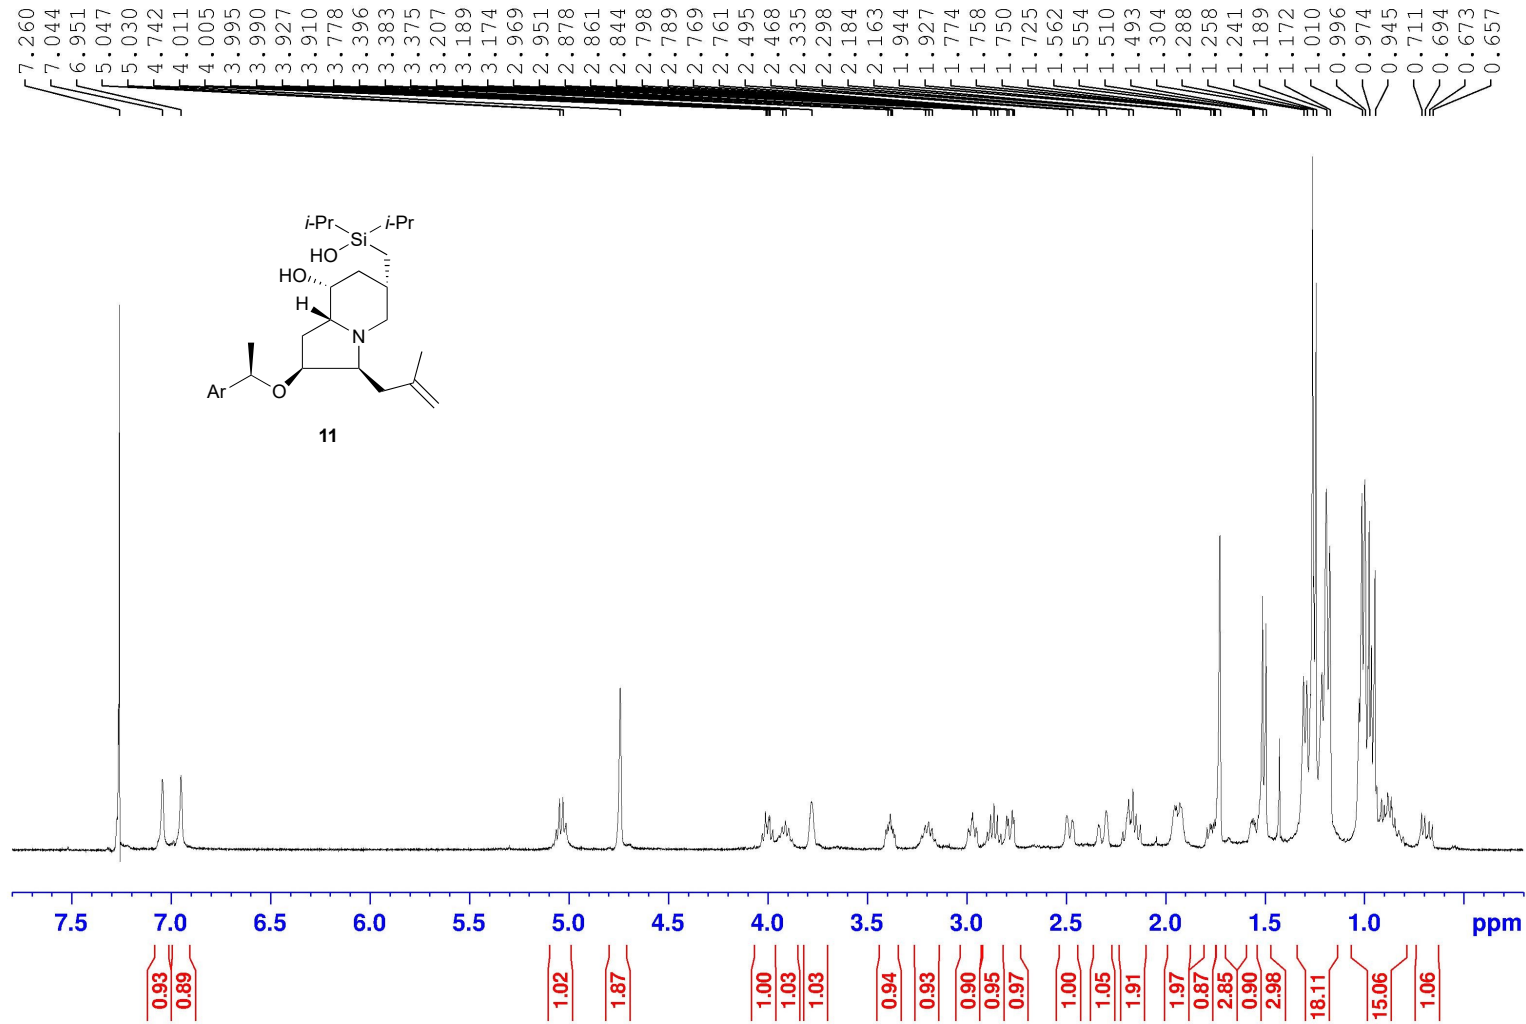

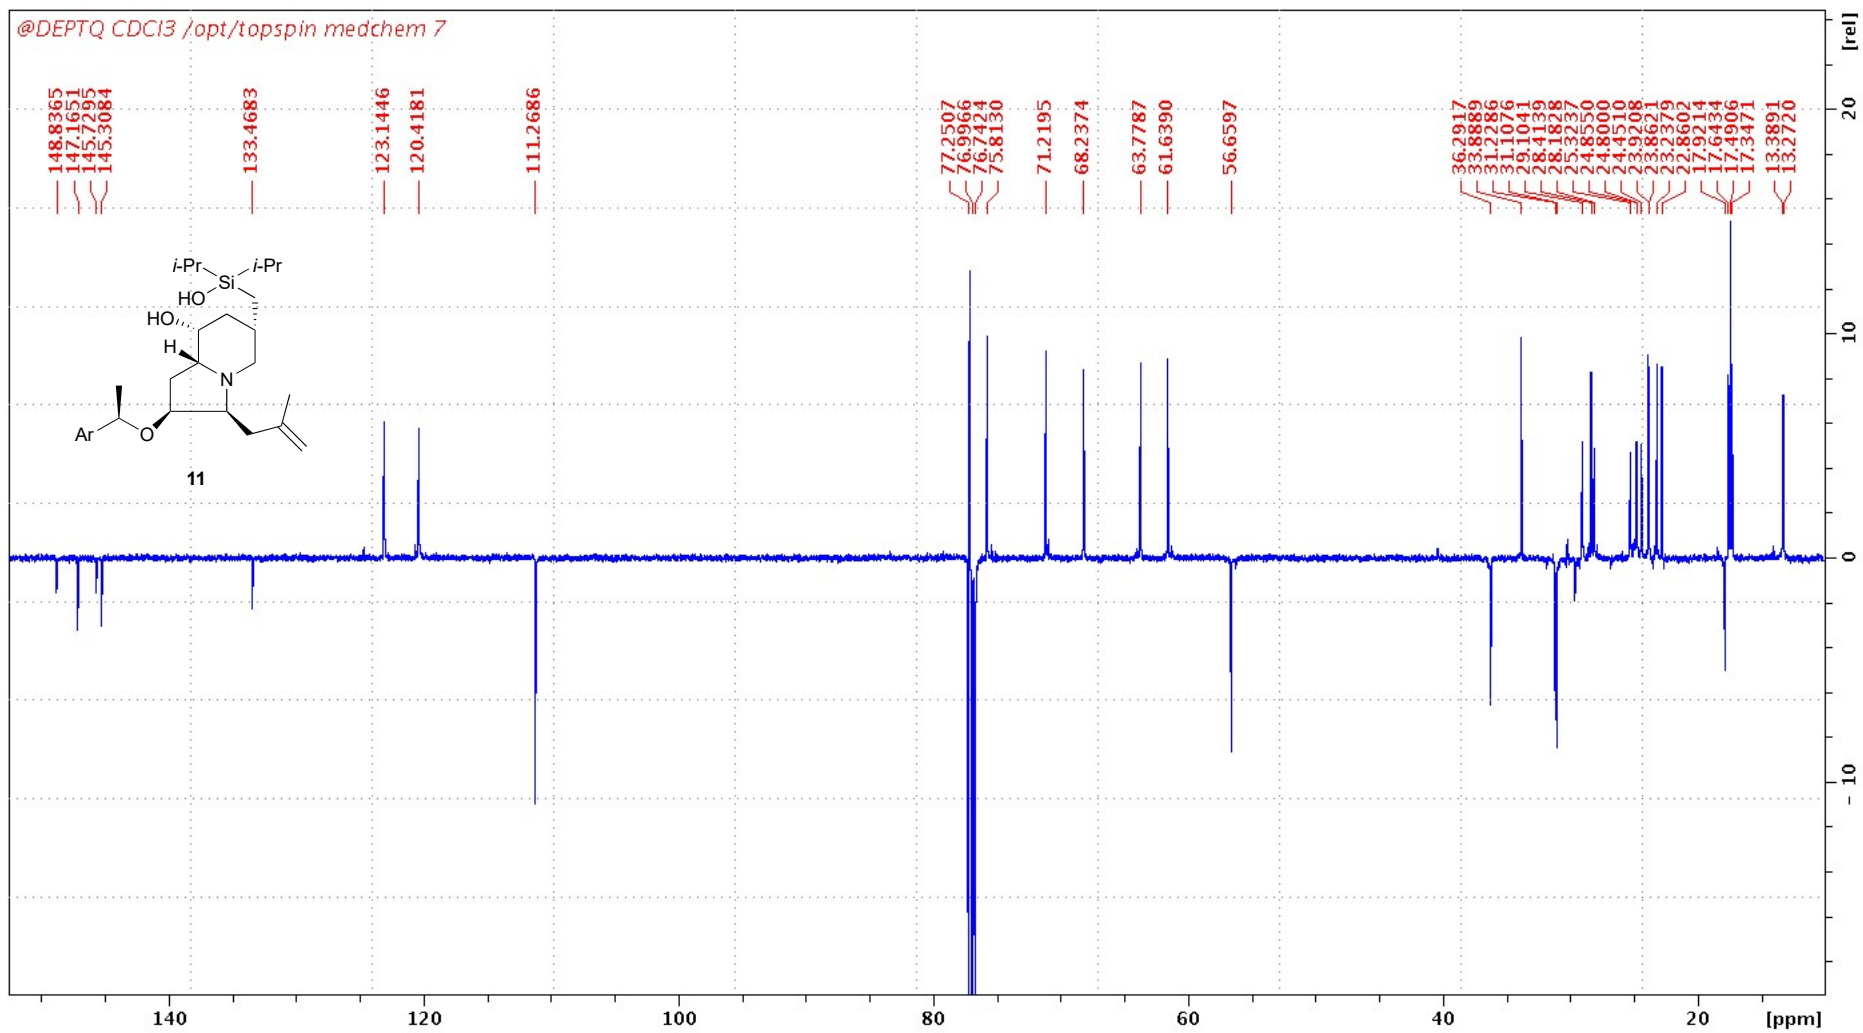

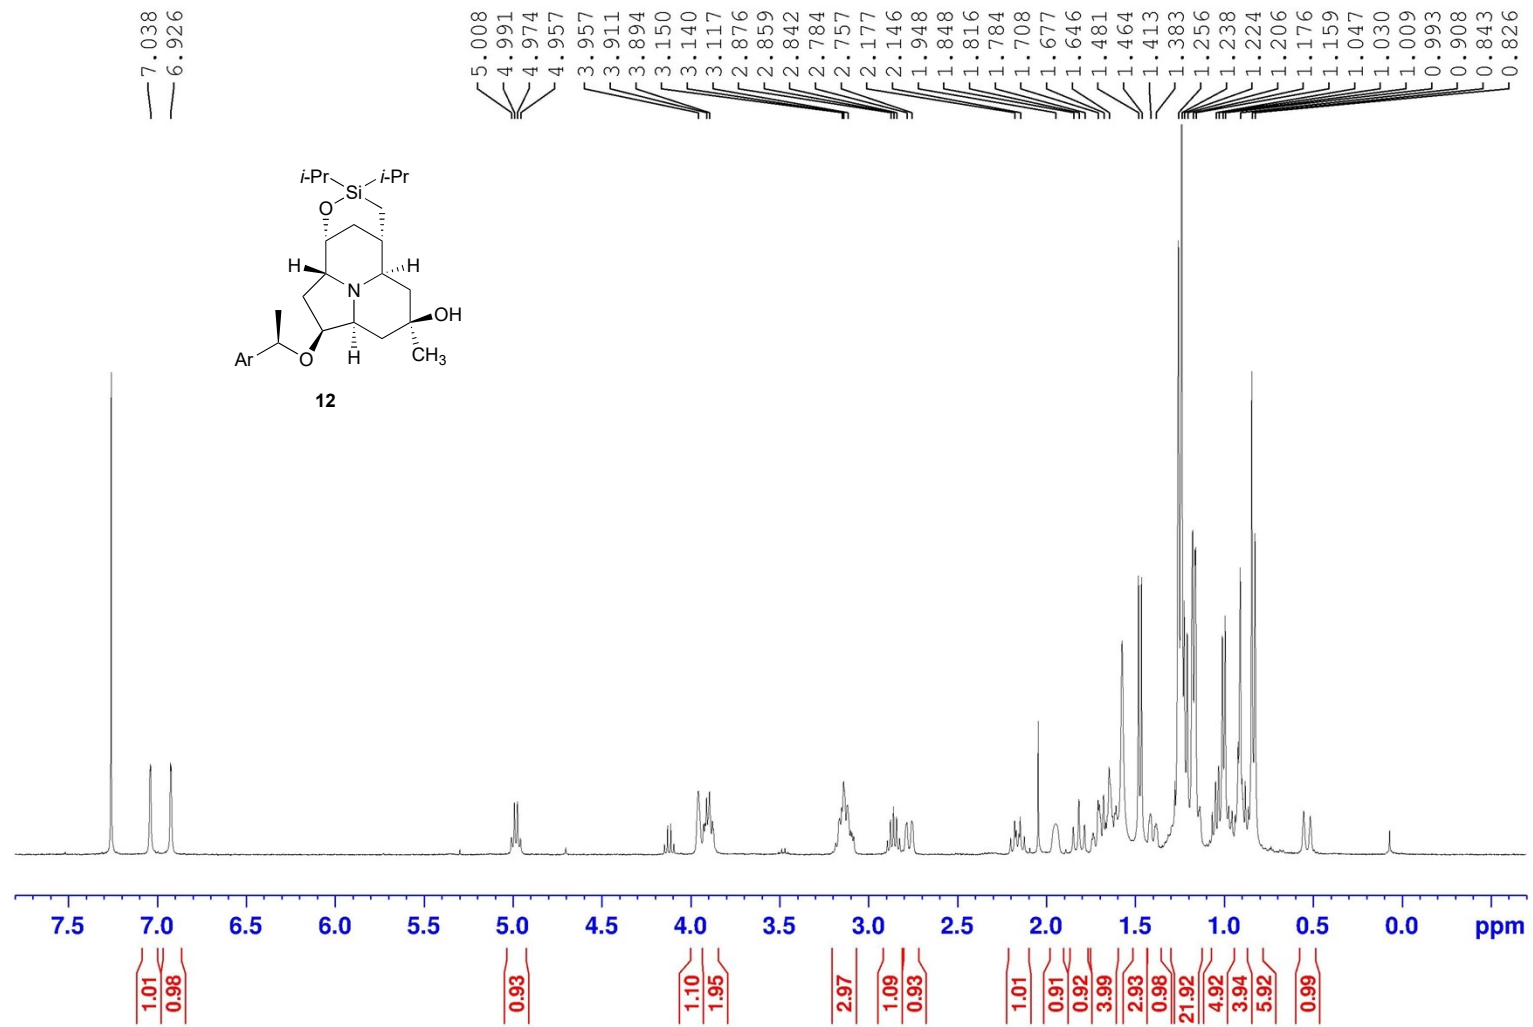

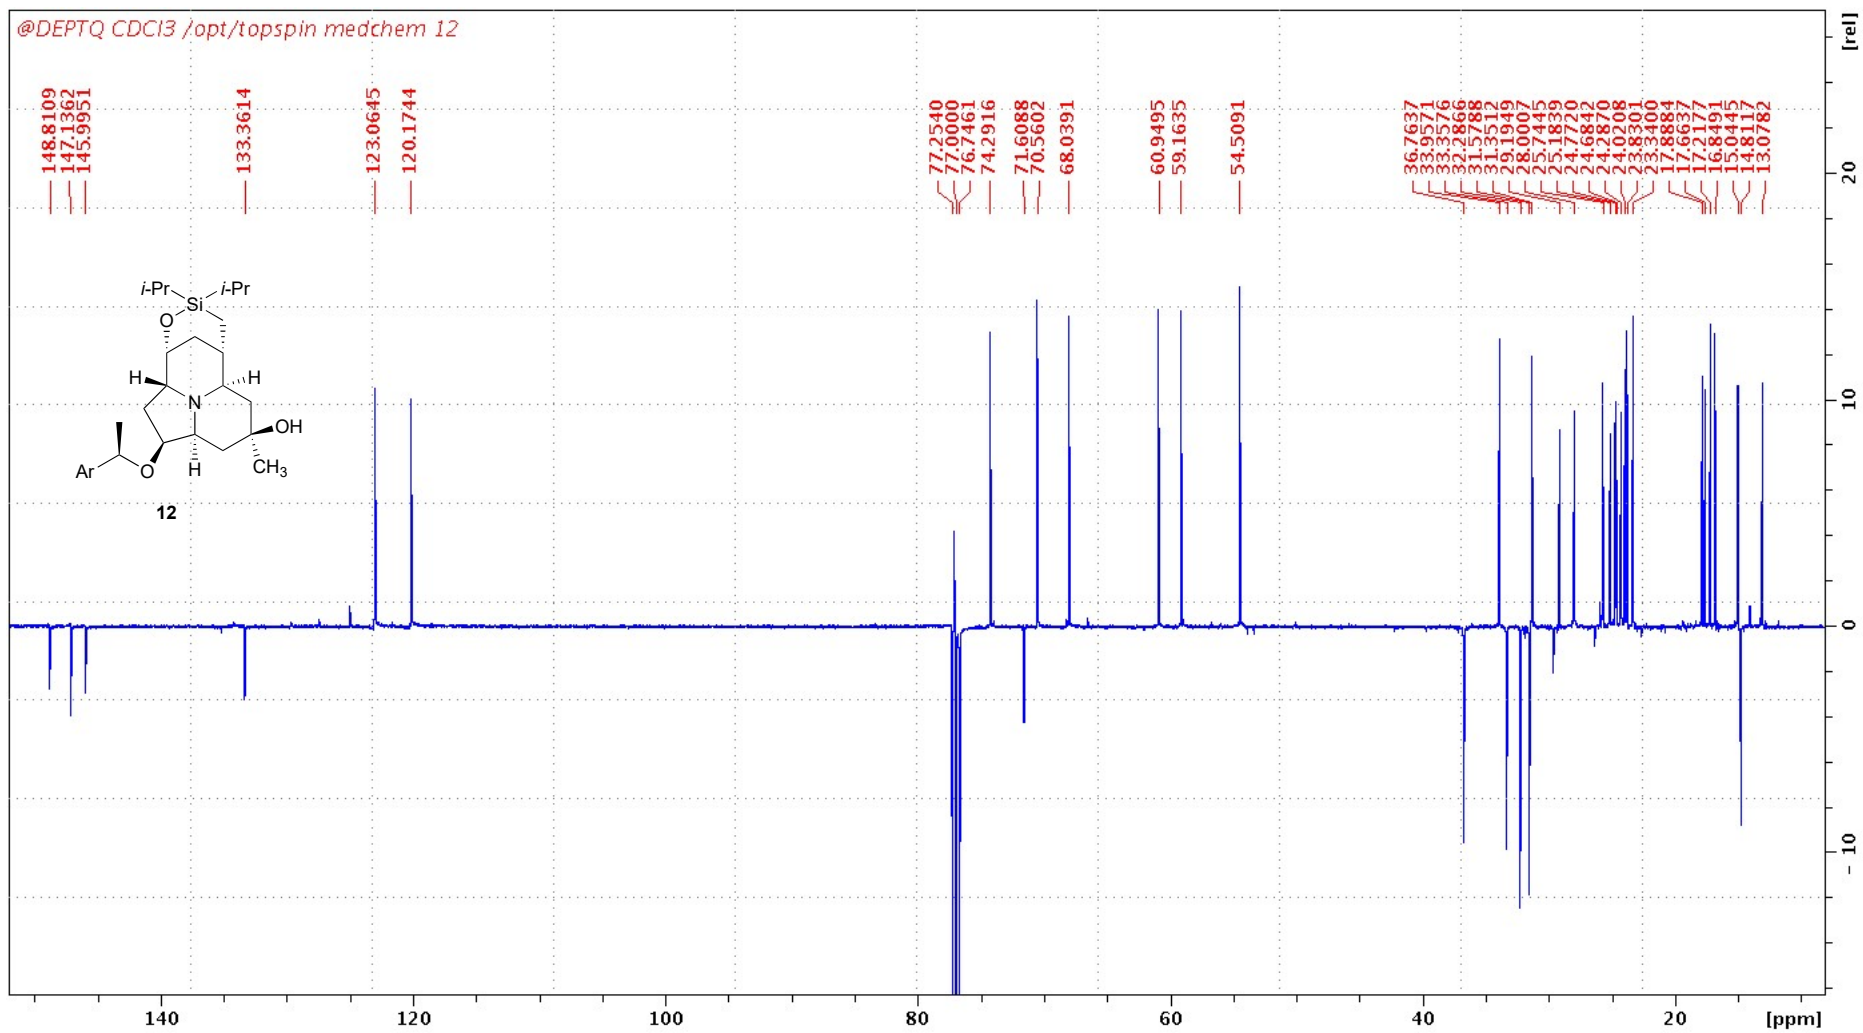

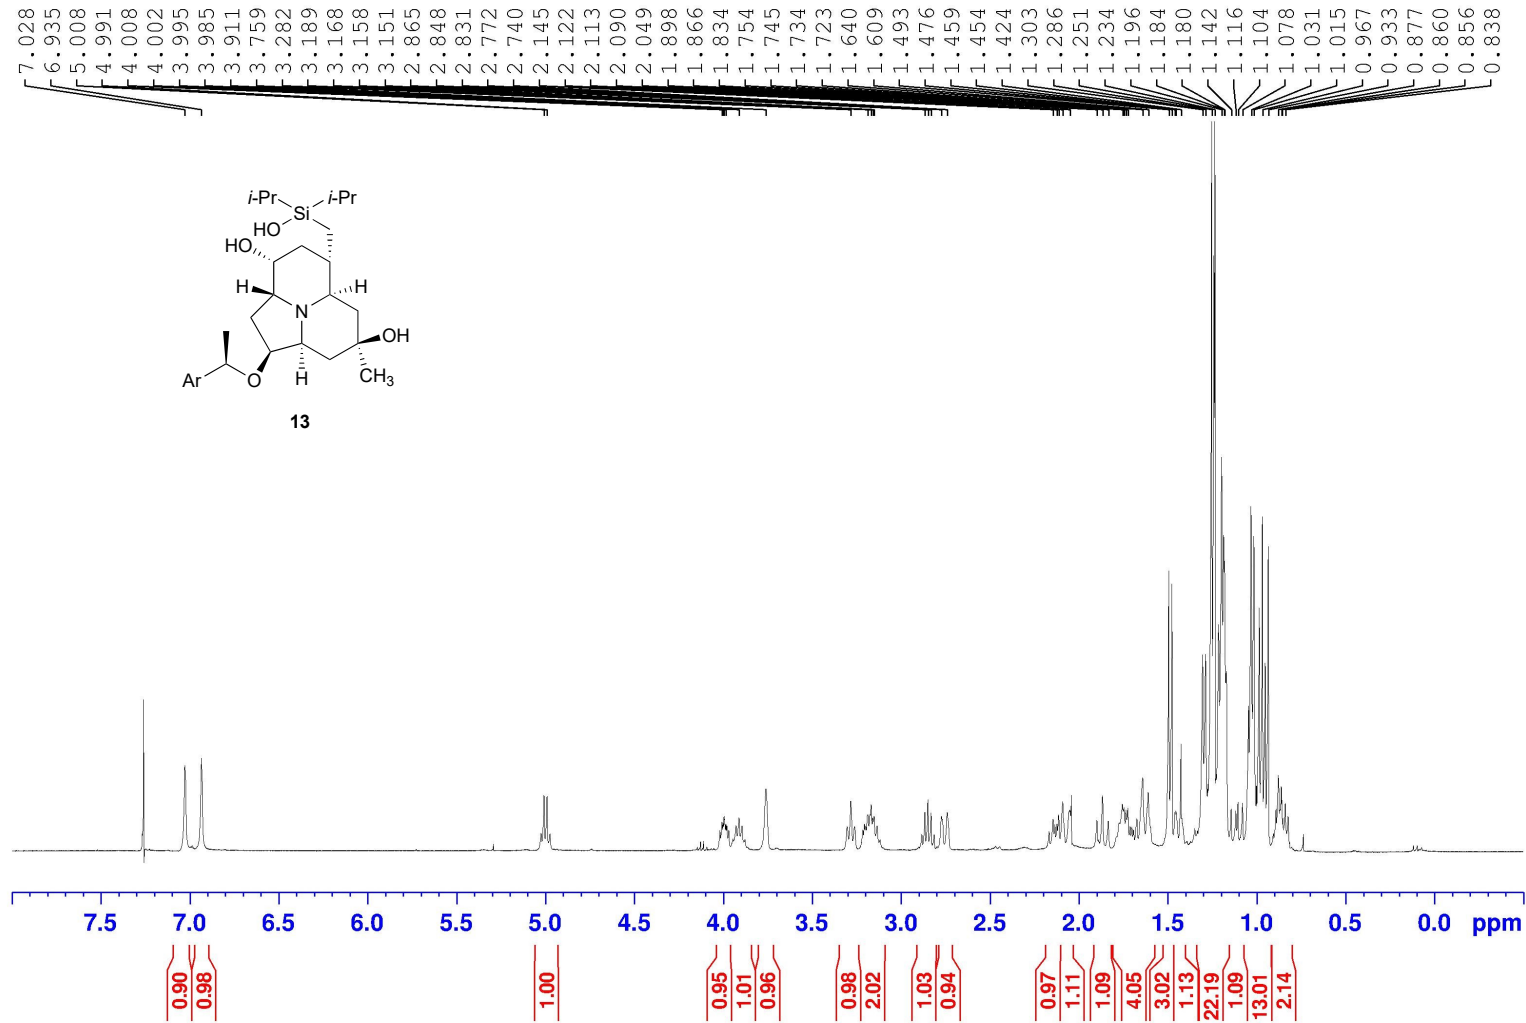

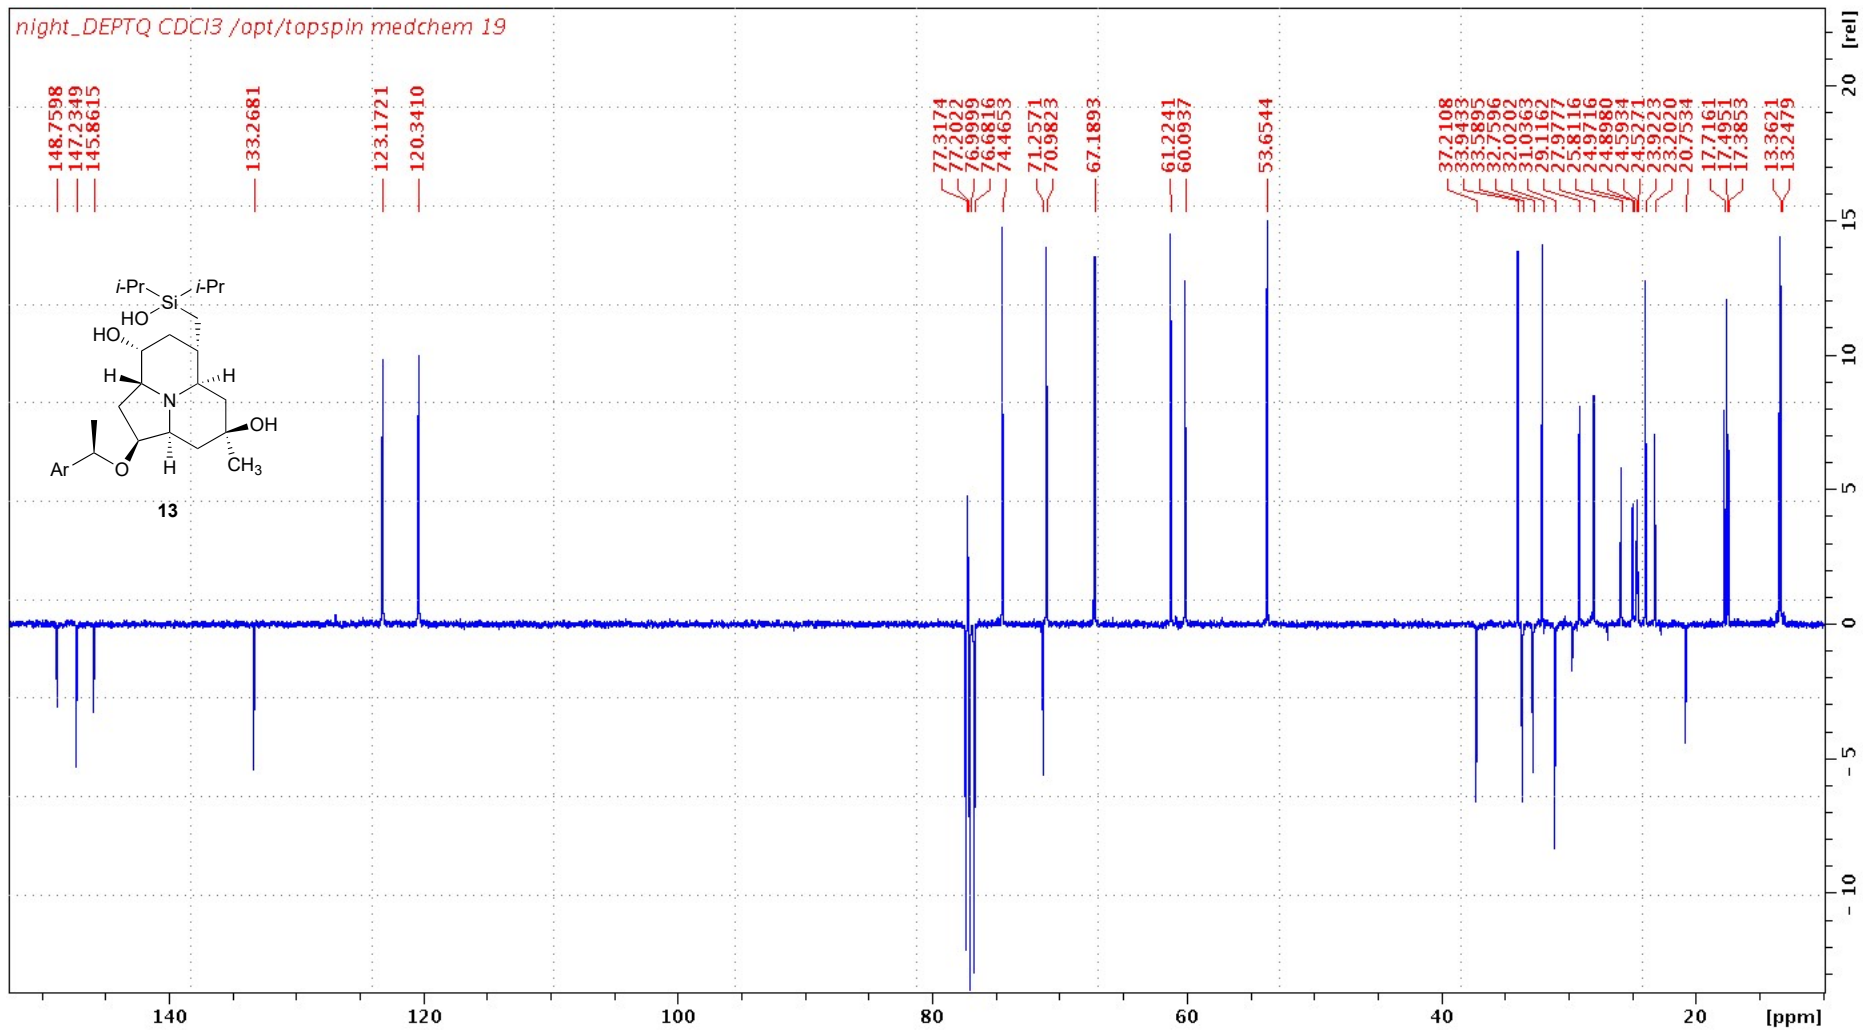

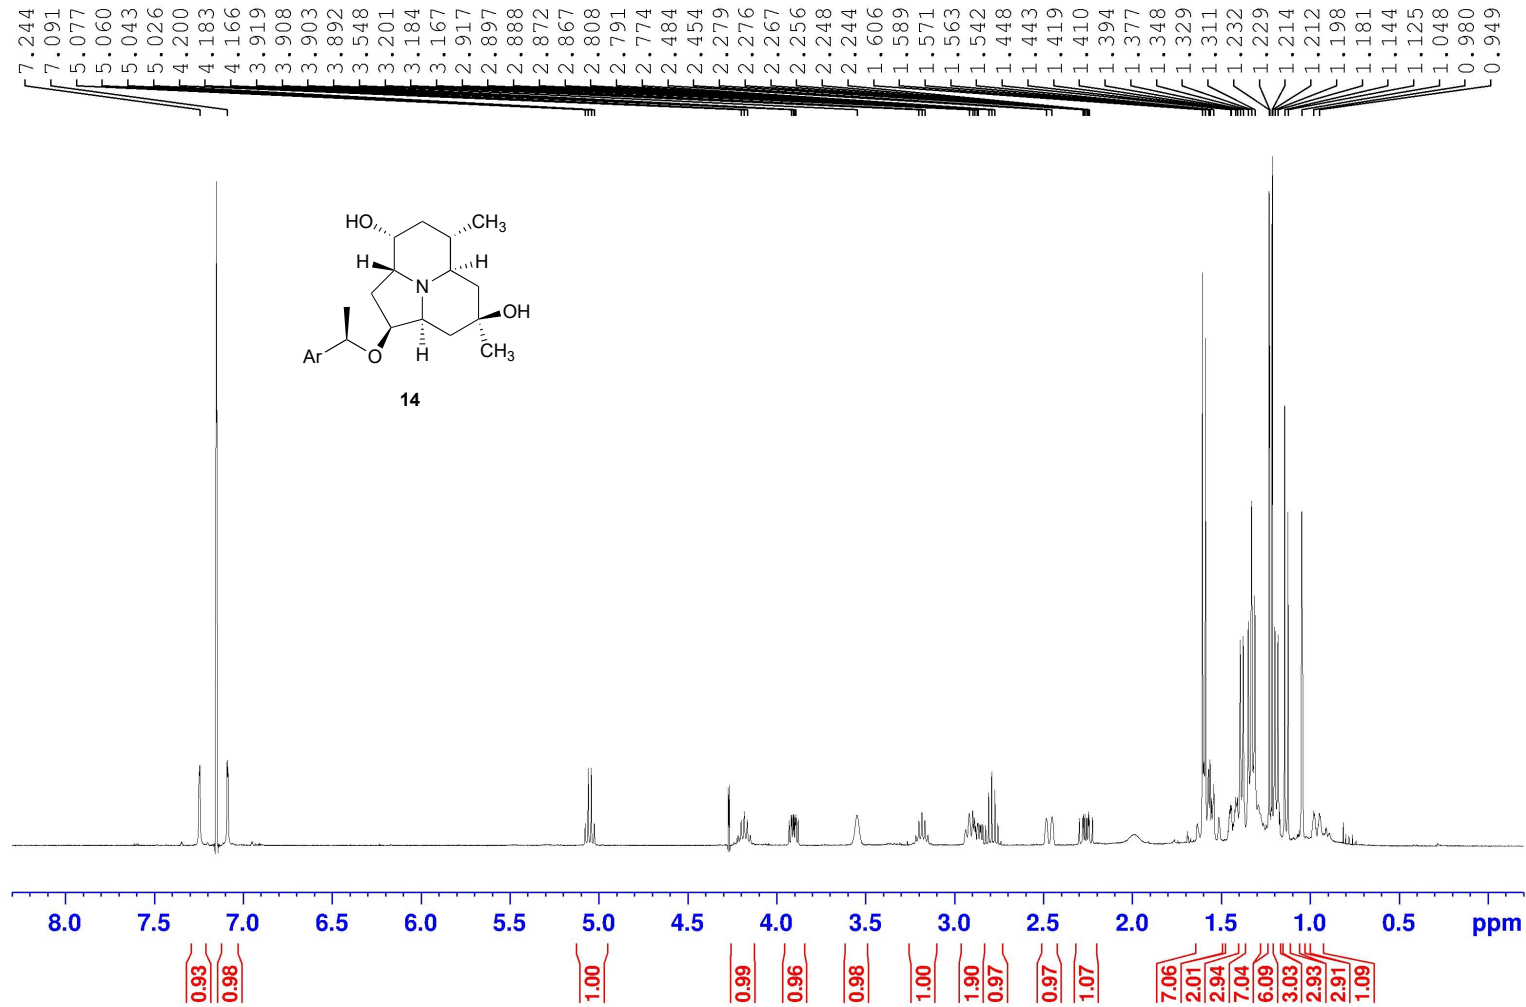



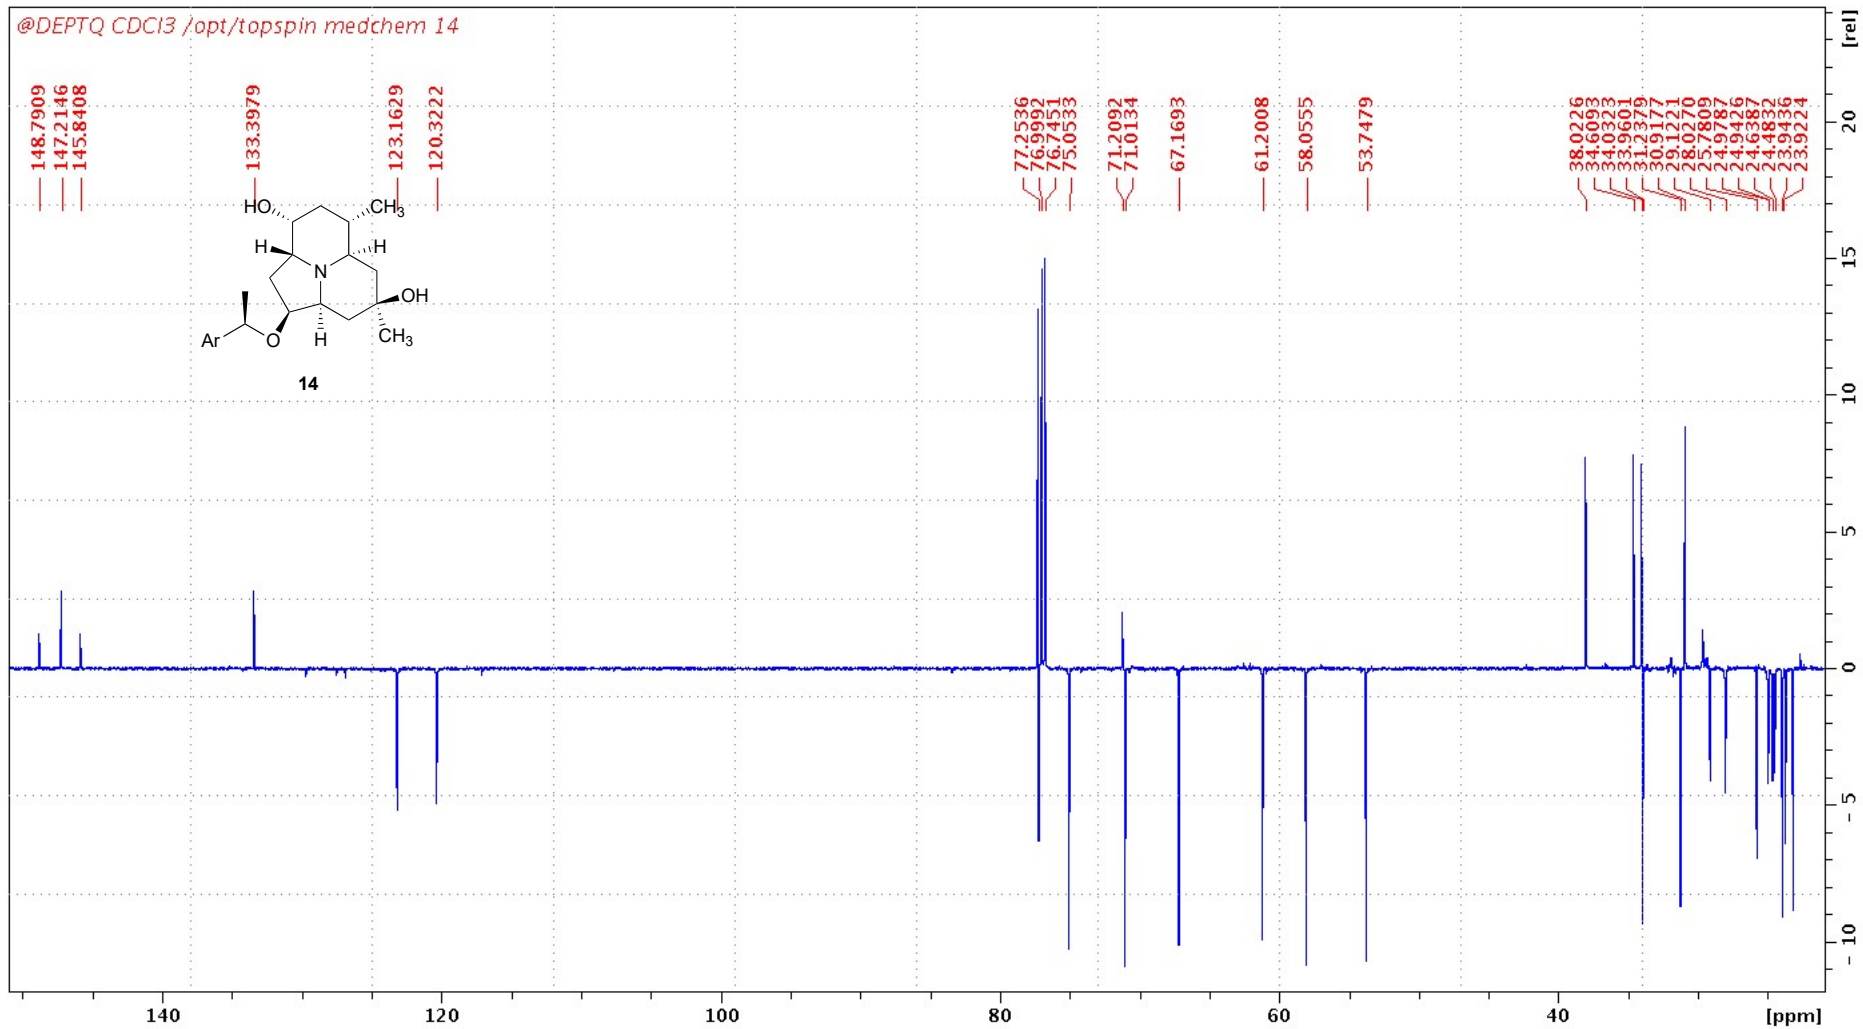

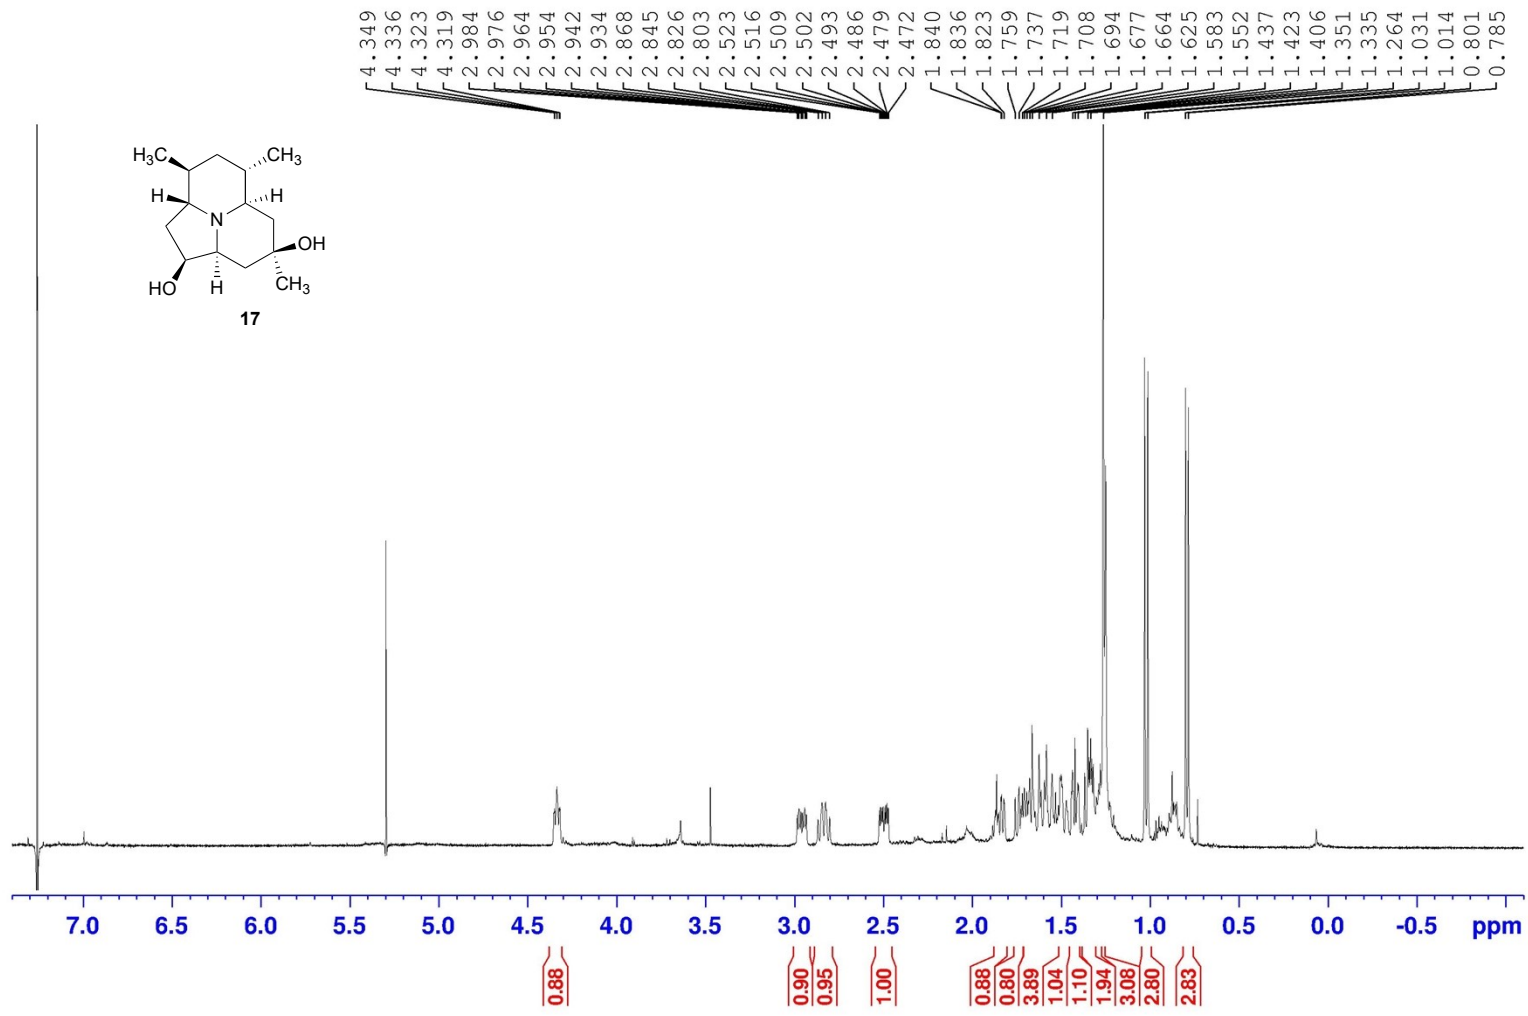

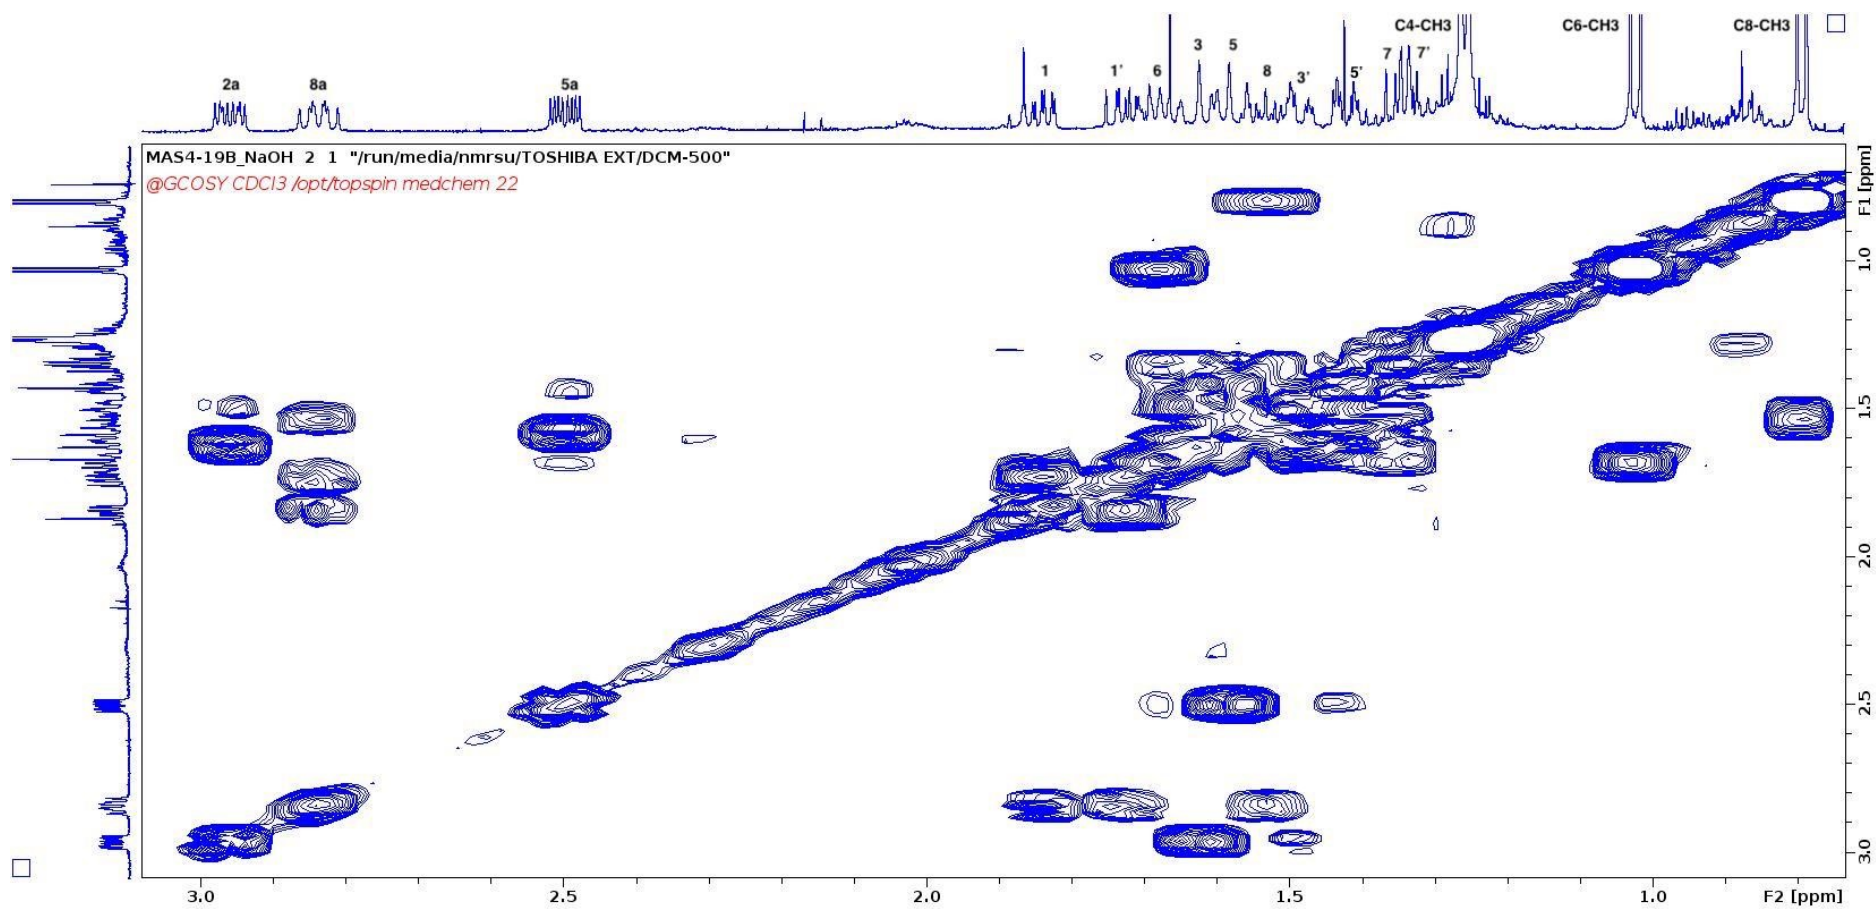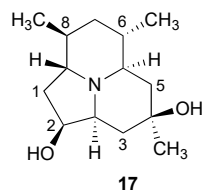

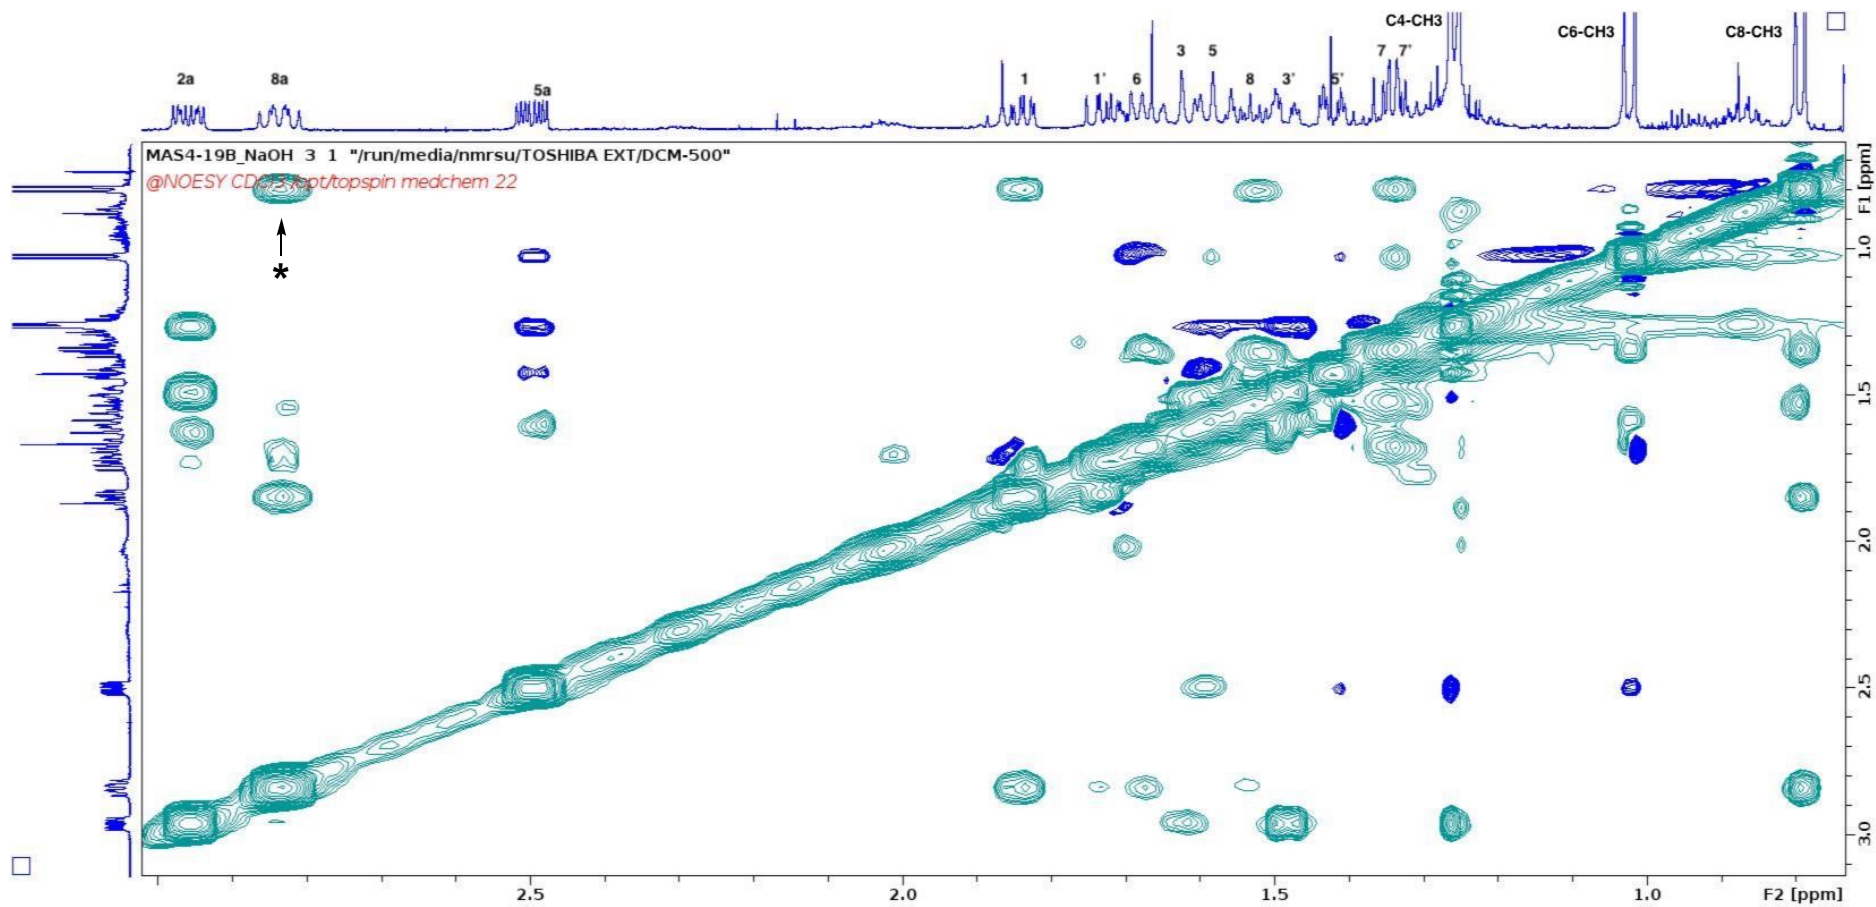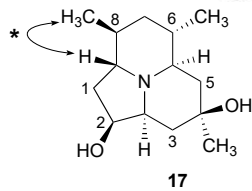

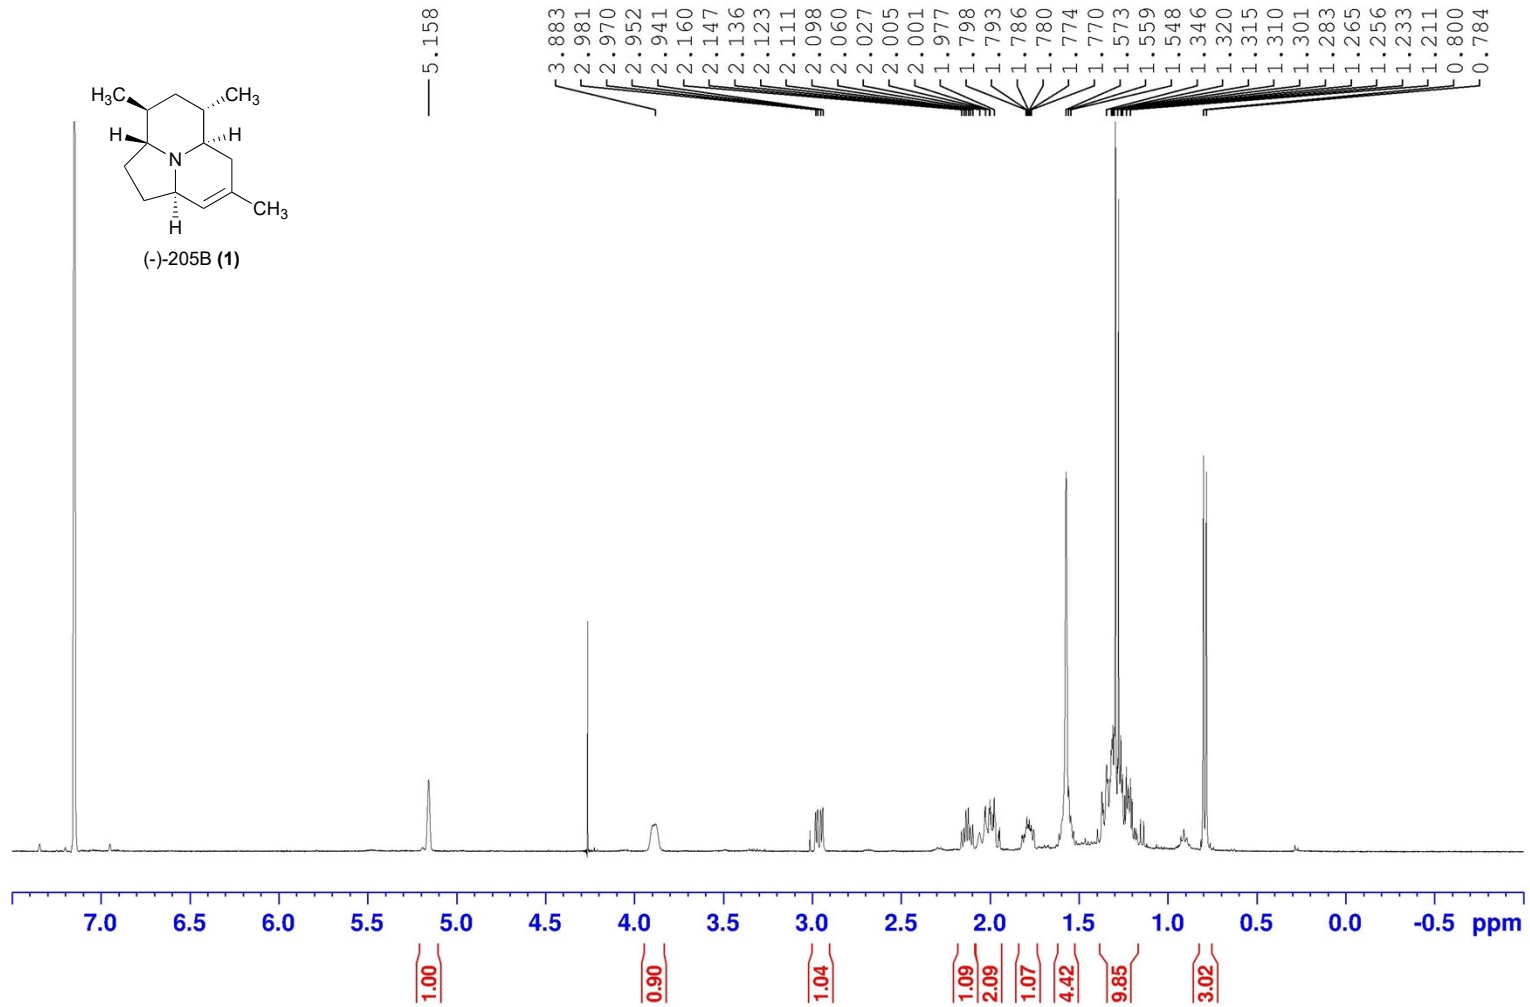

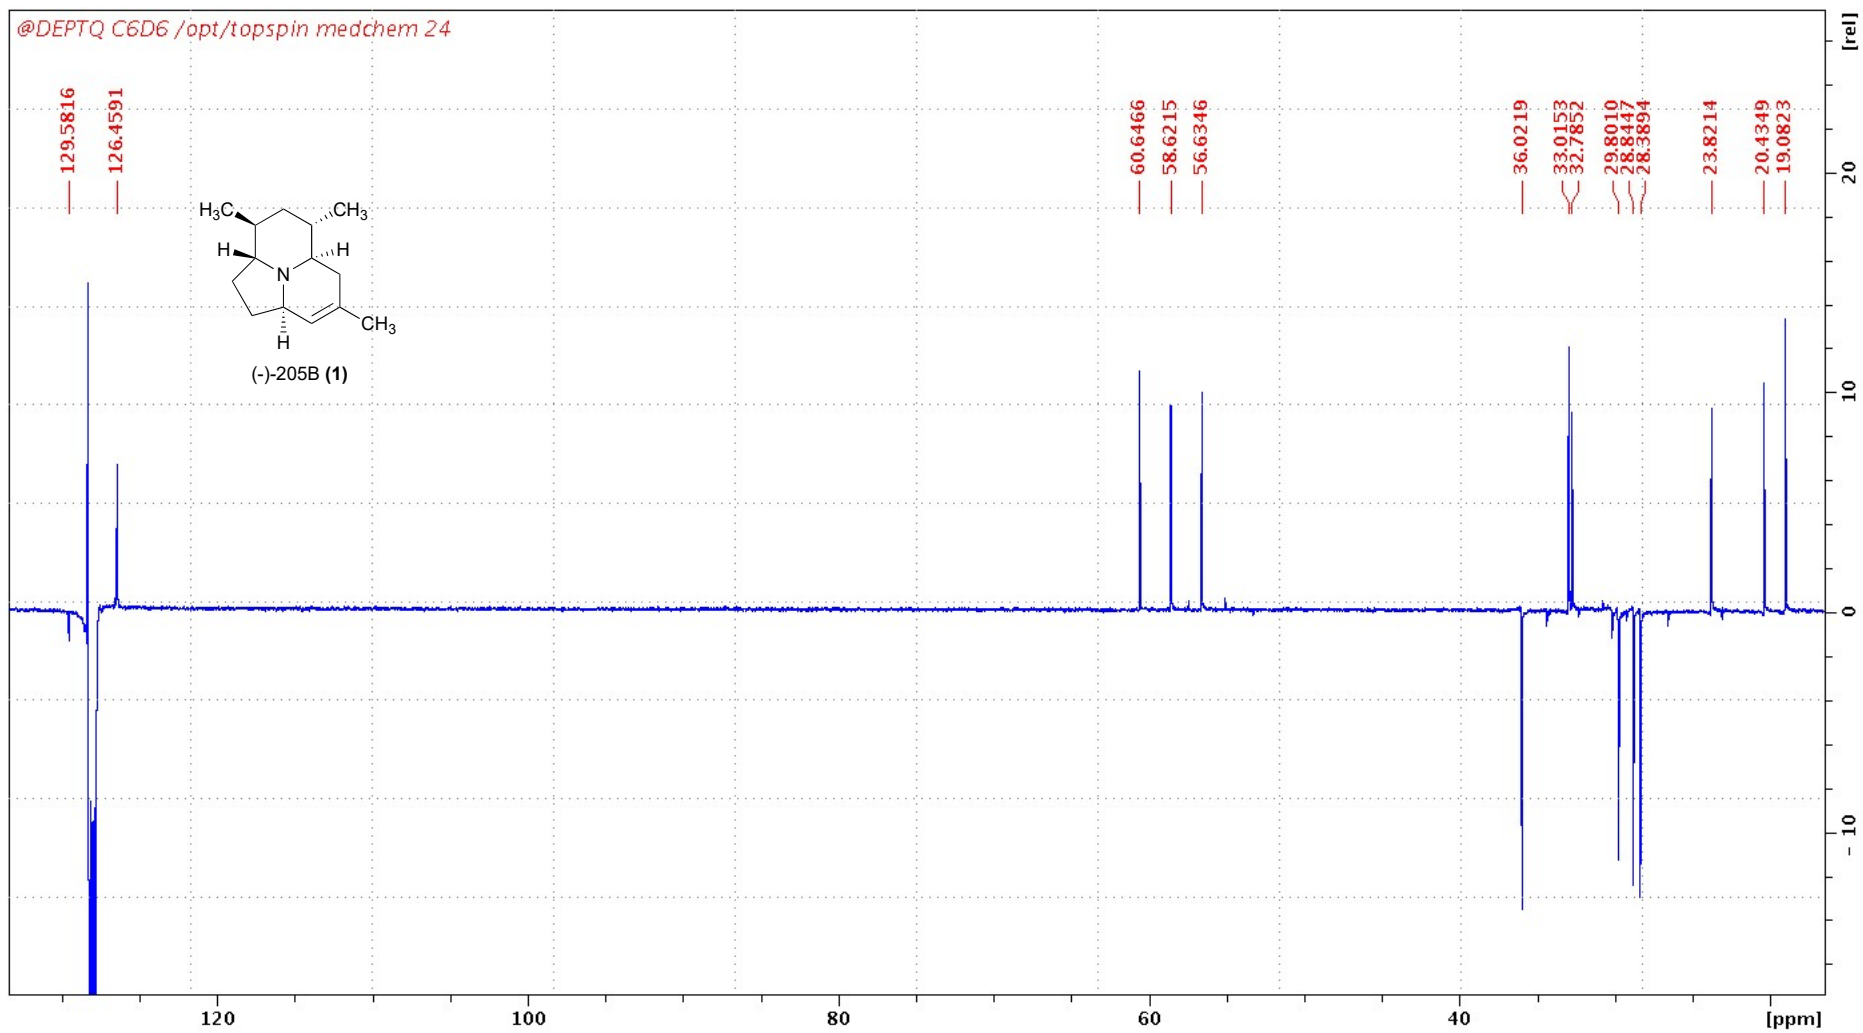

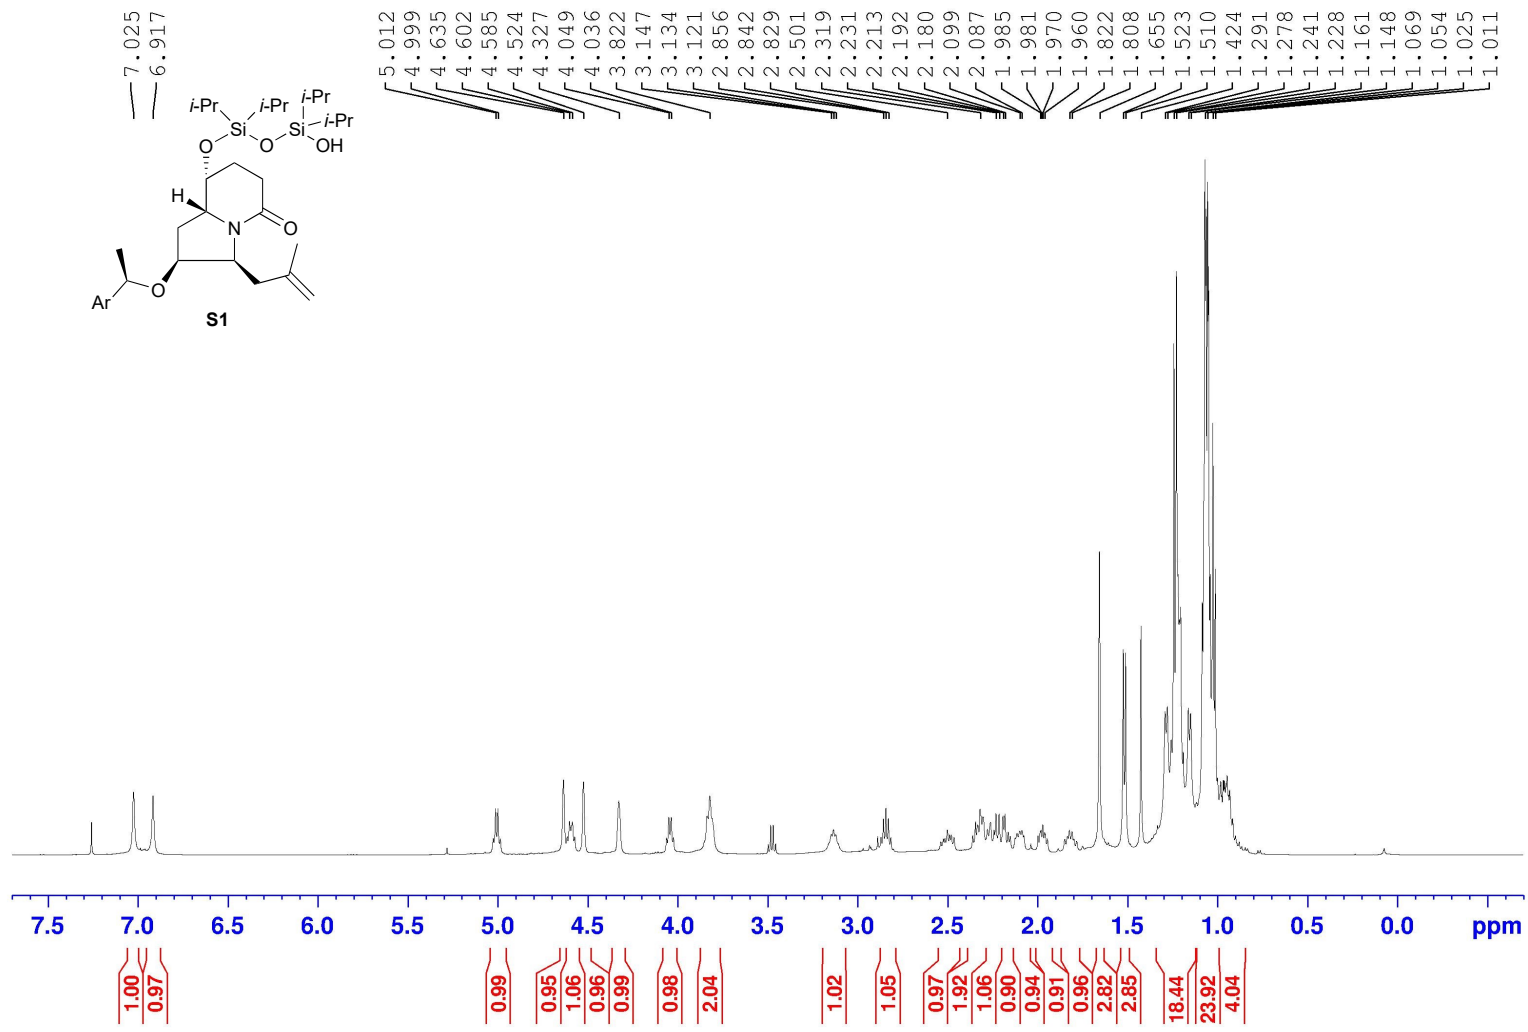

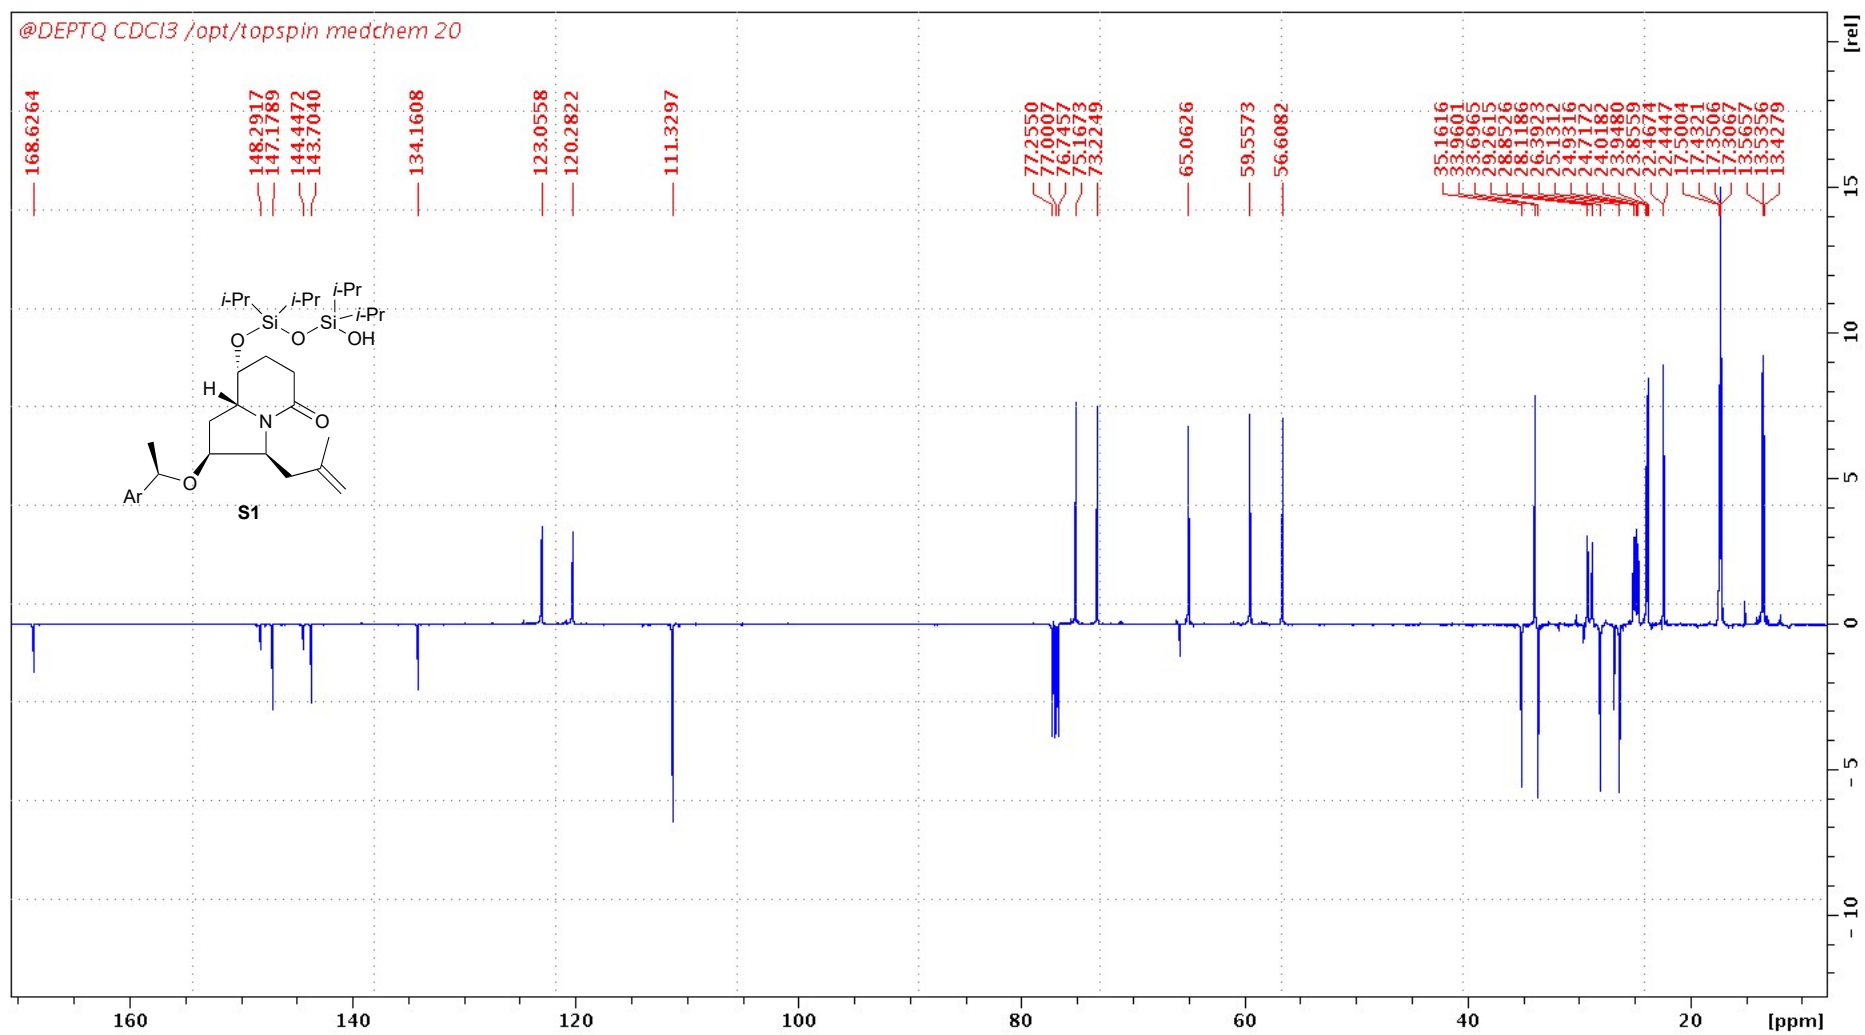

Supplement: d2ob01723g1.pdf [file d2ob01723g1.pdf]
